# Supplementary material for: CEACAM1 Orchestrates Lipid Raft Dynamics and B-cell Receptor Signaling in Mantle Cell Lymphoma
Source: Research Square preprint supplement (doi:10.21203/rs.3.rs-5321424/v1), 2024-11-01
Supplement: Supplementary file 1 [file 03e6654d7071bdd66cd4574d.xlsx]

## Sheet: Fig. 6B-Signal counts
Fig. 6B: Signal counts/cell
PLA: CEACAM1-CD79B									PLA: CEACAM1-LYN									PLA: CEACAM1-SYK									PLA: CEACAM1-SHP-1
4L				Delta N					4L				Delta N					4L				Delta N					4L				Delta N
4L: 0'	4L: 5'	4L: 15'	4L: 30'	dN: 0'	dN: 5'	dN: 15'	dN: 30'		0'	5'	15'	30'	0'	5'	15'	30'		4L: 0'	4L: 5'	4L: 15'	4L: 30'	dN: 0'	dN: 5'	dN: 15'	dN: 30'		4L: 0'	4L: 5'	4L: 15'	4L: 30'	dN: 0'	dN: 5'	dN: 15'	dN: 30'
3	12	3	2	0	2	2	1		0	0	0	0	0	4	2	1		1	8	0	1	14	2	2	1		0	0	0	0	1	1	1	0
7	24	6	0	1	2	1	1		0	0	0	0	0	3	0	0		0	13	5	0	1	1	3	0		0	0	0	0	0	0	1	0
4	18	19	3	0	5	2	1		0	0	0	0	0	4	1	5		2	5	1	4	1	6	0	1		0	0	0	0	0	0	1	0
3	20	17	8	0	2	0	0		0	0	0	0	1	0	0	1		2	11	5	1	14	1	3	0		0	0	0	0	0	0	1	0
2	14	10	10	0	2	0	0		0	0	0	0	0	10	0	1		0	4	11	1	0	25	1	0		0	0	0	0	1	0	1	1
1	14	30	2	0	2	0	4		0	0	0	0	1	7	4	12		2	10	1	5	0	11	0	4		0	0	0	0	0	0	0	0
10	11	23	10	0	3	0	4		0	0	0	0	0	1	1	2		0	5	1	1	1	3	11	1		0	0	0	0	0	1	3	0
8	35	19	6	2	1	3	3		0	0	0	0	0	17	2	0		2	29	14	1	0	5	22	2		0	0	0	0	0	0	0	0
8	13	15	9	0	4	1	4		0	0	0	0	2	6	1	2		0	11	6	2	8	16	15	1		0	0	0	0	8	0	1	1
1	44	31	4	2	2	0	4		0	0	0	0	1	20	18	9		1	15	9	2	0	4	0	2		0	0	0	0	0	1	0	0
7	19	15	18	0	1	9	2		0	0	0	0	0	3	5	3		3	10	14	3	3	1	3	0		0	0	0	0	0	0	1	0
11	7	15	14	0	3	2	0		0	0	0	0	4	3	1	1		2	3	14	5	0	1	2	2		0	0	0	0	0	1	1	0
3	10	20	7	1	2	0	5		0	0	0	0	1	6	1	0		2	10	18	1	4	2	0	4		0	0	0	0	0	1	0	0
1	17	14	6	2	0	1	1		0	0	0	0	0	2	18	3		3	18	6	2	0	0	15	0		0	0	0	0	0	1	0	1
2	6	14	13	0	2	1	2		0	0	0	0	2	5	14	0		3	12	5	0	0	0	0	2		0	0	0	0	0	0	0	0
5	24	31	6	0	0	2	2		0	0	0	0	1	2	10	6		0	1	2	6	0	23	0	0		0	0	0	0	0	1	0	0
6	33	23	3	0	0	0	1		0	0	0	0	0	2	4	1		1	7	4	4	5	0	2	0		0	0	0	0	0	3	0	0
3	34	25	8	2	3	2	2		0	0	0	0	0	2	1	0		1	23	6	1	0	17	5	1		0	0	0	0	0	0	1	0
3	26	26	19	2	7	1	2		0	0	0	0	6	3	0	0		1	15	19	0	1	3	0	0		0	0	0	0	0	0	0	0
7	36	17	6	1	4	0	0		0	0	0	0	2	1	10	1		0	7	15	5	8	0	2	0		0	0	0	0	0	1	2	0
5	26	27	4	1	5	1	1		0	0	0	0	0	2	2	13		5	6	6	1	16	2	1	0		0	0	0	0	0	1	1	1
5	19	19	4	1	0	0	2		0	0	0	0	2	0	0	6		3	28	8	4	13	3	4	0		0	0	0	0	0	0	2	0
5	20	35	19	0	0	0	2		0	0	0	0	8	6	0	1		2	12	12	1	1	0	9	0		0	0	0	0	1	1	2	1
2	30	14	22	1	4	0	1		0	0	0	0	4	1	1	0		1	15	8	4	0	2	1	0		0	0	0	0	0	1	0	0
6	22	14	5	0	8	0	0		0	0	0	0	1	1	12	3		4	17	19	0	0	21	0	1		0	0	0	0	0	0	1	0
9	22	14	6	1	5	0	3		0	0	0	0	2	19	0	1		2	16	9	1	0	1	4	0		0	0	0	0	0	2	0	0
4	20	27	8	1	0	1	1		0	0	0	0	16	9	1	9		0	7	18	3	0	26	3	1		0	0	0	0	0	2	1	0
4	11	24	7	0	1	0	2		0	0	0	0	1	1	2	0		4	15	17	3	0	0	15	4		0	0	0	0	1	0	0	0
6	10	12	1	0	3	1	0		0	0	0	0	0	3	2	3		0	9	7	1	0	2	2	1		0	0	0	0	0	2	0	0
9	22	10	6	0	0	0	2		0	0	0	0	1	0	4	1		2	15	1	1	0	0	4	0		0	0	0	0	0	1	4	2
8	24	18	5	0	4	0	2		0	0	0	0	0	0	2	6		4	9	21	1	3	4	3	0		0	0	0	0	0	3	0	0
6	17	21	2	0	4	3	0		0	0	0	0	0	33	12	0		4	16	4	4	0	0	12	2		0	0	0	0	0	0	0	0
11	22	25	1	0	0	1	0		0	0	0	0	0	9	0	9		4	7	7	6	0	0	0	0		0	0	0	0	0	0	1	0
3	21	3	5	1	1	2	5		0	0	0	0	1	4	0	21		2	11	11	1	0	0	0	0		0	0	0	0	0	0	2	1
3	26	24	7	0	2	0	1		0	0	0	0	0	0	0	0		2	2	13	2	0	0	1	3		0	0	0	0	0	0	0	0
9	20	8	8	1	0	2	2		0	0	0	0	0	1	0	1		0	13	7	1	0	0	0	0		0	0	0	0	0	1	6	1
10	17	16	2	0	0	0	2		0	0	0	0	1	0	2	0		7	8	4	1	0	0	0	1		0	0	0	0	0	0	0	0
9	28	16	13	0	0	0	1		0	0	0	0	0	0	0	0		0	12	15	1	0	1	0	0		0	0	0	0	0	1	3	0
4	23	21	2	0	1	1	2		0	0	0	0	1	0	0	0		3	12	7	1	0	0	1	0		0	0	0	0	0	1	0	0
3	23	12	2	0	0	0	1		0	0	0	0	0	1	1	1		4	10	8	2	1	1	2	0		0	0	0	0	0	0	1	0
5	15	18	8	0	7	5	2		0	0	0	0	0	17	18	0		4	10	14	0	0	0	6	1		0	0	0	0	0	0	3	1
3	14	24	8	0	0	1	1		0	0	0	0	5	11	0	0		3	14	3	1	0	1	9	1		0	0	0	0	0	0	0	0
1	6	30	3	2	1	3	0		0	0	0	0	1	4	0	9		3	5	8	5	0	0	0	3		0	0	0	0	0	0	0	0
9	8	36	9	1	0	0	2		0	0	0	0	1	6	0	0		2	10	7	0	1	0	2	1		0	0	0	0	0	0	0	0
5	27	10	4	0	0	0	2		0	0	0	0	0	8	2	0		3	19	14	2	0	0	0	0		0	0	0	0	0	1	3	0
11	14	27	1	0	8	0	0		0	0	0	0	1	1	1	0		1	7	7	3	0	0	1	0		0	0	0	0	0	2	1	0
14	6	26	9	0	0	0	1		0	0	0	0	0	1	0	1		1	10	5	4	0	0	1	1		0	0	0	0	0	0	1	0
3	8	17	3	2	2	1	3		0	0	0	0	0	2	0	3		3	6	7	2	0	3	5	0		0	0	0	0	0	0	0	1
7	31	19	3	0	1	2	4		0	0	0	0	0	1	12	0		0	11	8	1	0	0	14	0		0	0	0	0	0	1	2	0
3	19	27	12	0	2	0	1		0	0	0	0	2	7	9	0		3	7	11	1	0	0	0	0		0	0	0	0	0	0	3	0
7	18	13	13	0	1	2	2		0	0	0	0	0	0	2	0		2	6	10	5	0	1	0	1		0	0	0	0	0	3	1	0
2	13	17	8	0	0	1	0		0	0	0	0	1	0	1	0		3	7	5	3	1	0	3	0		0	0	0	0	0	2	0	0
8	11	21	11	0	4	0	0		0	0	0	0	0	3	12	1		2	5	13	1	0	2	0	1		0	0	0	0	0	2	2	0
2	28	27	6	0	0	0	0		0	0	0	0	0	5	0	0		1	3	10	0	0	1	1	1		0	0	0	0	0	1	2	0
7	22	12	8	0	5	0	1		0	0	0	0	7	8	0	1		0	6	9	3	0	6	1	2		0	0	0	0	4	1	0	0
4	11	18	4	1	1	1	0		0	0	0	0	0	6	13	11		0	6	15	3	0	14	1	1		0	0	0	0	0	0	3	0
15	20	20	1	0	2	1	2		0	0	0	0	0	1	4	2		2	3	7	1	0	18	1	0		0	0	0	0	0	0	2	0
5	5	12	6	0	6	0	0		0	0	0	0	0	3	14	0		1	4	1	1	1	1	0	12		0	0	0	0	0	0	0	0
4	38	6	2	1	2	1	5		0	0	0	0	0	0	2	0		4	7	13	2	0	23	2	2		0	0	0	0	0	0	0	2
3	4	7	9	0	1	0	4		0	0	0	0	0	5	6	2		4	13	8	2	0	9	0	0		0	0	0	0	0	1	2	0
8	3	10	4	0	2	0	3		0	0	0	0	16	14	10	1		0	10	5	4	0	2	1	4		0	0	0	0	1	1	2	0
1	27	19	3	0	0	0	3		0	0	0	0	1	1	0	9		1	2	16	3	0	1	2	0		0	0	0	0	0	1	0	0
5	9	13	14	0	1	1	1		0	0	0	0	0	2	0	13		2	33	6	2	0	1	3	0		0	0	0	0	0	0	0	1
14	6	14	16	0	4	0	5		0	0	0	0	0	0	3	0		0	11	9	3	0	1	2	1		0	0	0	0	4	1	0	1
3	9	26	15	0	2	0	3		0	0	0	0	0	7	3	1		2	10	9	2	6	11	2	0		0	0	0	0	0	0	0	1
14	7	18	6	0	1	0	0		0	0	0	0	0	1	1	0		3	5	11	2	4	1	0	1		0	0	0	0	0	2	0	6
24	9	13	14	0	4	0	3		0	0	0	0	1	0	9	3		1	10	6	3	3	1	0	1		0	0	0	0	0	0	1	1
9	6	25	3	0	1	0	1		0	2	0	0	11	6	0	8		2	3	4	0	0	3	8	0		0	0	0	0	1	0	2	0
7	3	9	6	1	0	0	2		0	7	0	0	0	2	0	9		3	18	2	0	0	0	3	10		0	0	0	0	3	0	3	0
1	5	11	11	1	0	1	2		0	8	0	0	0	1	7	11		1	3	5	1	1	0	0	6		0	0	0	0	0	0	4	1
6	13	28	1	0	1	0	1		0	7	0	0	2	1	0	4		2	6	5	1	0	0	5	1		0	0	0	0	0	0	1	0
9	23	34	21	0	4	1	6		0	14	0	0	0	9	11	1		1	5	4	1	0	4	1	4		0	0	0	0	1	0	1	1
2	14	17	11	1	1	0	5		0	5	0	0	0	3	2	3		0	12	2	2	1	1	1	0		0	0	0	0	1	1	0	3
7	11	19	3	1	2	0	2		1	15	0	2	0	0	3	1		0	11	10	0	17	0	1	1		0	0	0	0	0	0	3	1
5	24	21	7	0	2	1	0		4	9	0	2	0	3	0	0		0	14	5	2	5	0	0	2		0	0	0	0	1	0	1	0
8	4	17	24	1	0	1	3		5	9	0	9	1	0	6	1		2	0	12	3	1	1	5	1		0	0	0	0	0	1	1	1
6	14	8	9	0	2	3	2		3	11	2	2	0	6	1	3		1	4	12	0	0	5	2	1		0	0	0	0	5	2	3	0
9	27	37	11	0	0	1	3		11	13	10	5	0	6	2	1		0	18	3	3	1	3	0	2		0	0	0	0	0	0	2	8
5	18	9	10	0	0	0	0		6	17	14	6	5	0	0	0		1	10	8	2	0	1	13	0		0	0	0	0	2	0	1	0
9	16	4	10	0	2	0	4		9	7	1	7	0	0	0	0		3	8	5	6	1	0	6	1		0	2	0	0	1	2	1	1
1	15	5	8	0	1	1	3		4	12	4	2	2	2	1	0		0	13	10	5	0	1	2	0		0	3	0	0	0	0	0	0
3	20	9	9	3	0	1	2		3	11	13	2	0	2	2	2		1	8	8	2	0	0	1	5		1	4	0	0	1	0	0	0
1	24	14	13	0	1	4	3		6	7	8	3	0	0	1	1		3	15	18	5	0	0	2	1		3	1	0	0	0	1	2	2
5	20	35	9	0	2	0	4		9	14	12	2	0	2	2	2		0	12	4	1	1	1	0	2		9	2	0	0	0	2	0	0
6	20	7	16	1	0	1	1		15	1	14	5	0	0	5	9		1	7	11	1	0	1	18	15		1	1	0	0	0	0	3	0
9	16	6	11	0	0	0	2		4	8	7	2	0	3	7	1		1	5	11	1	2	0	9	5		1	6	0	0	0	2	4	1
5	17	32	18	0	0	0	1		12	5	14	5	0	4	0	2		1	5	13	6	0	0	10	3		0	3	0	0	1	0	3	0
4	13	14	11	0	3	5	2		2	17	11	5	0	7	1	1		1	9	5	2	0	1	14	0		2	2	0	0	0	0	1	2
6	16	19	0	1	0	1	0		1	9	11	5	0	2	0	2		2	11	18	4	8	0	0	0		2	4	0	0	0	0	2	1
6	23	28	9	0	3	1	1		2	13	5	7	1	0	2	22		1	8	20	3	4	6	2	1		2	1	0	2	1	0	0	0
10	20	5	9	0	0	0	0		3	12	15	8	0	2	0	0		2	11	13	2	0	0	17	0		1	2	0	6	0	1	0	0
6	16	20	5	0	3	1	0		15	9	9	2	0	0	5	0		0	6	4	1	1	0	0	0		2	3	0	4	3	0	2	0
3	27	11	9	0	2	2	2		5	22	3	9	0	6	0	5		3	13	5	6	0	2	4	1		1	11	0	6	0	0	1	0
2	19	13	8	0	4	0	3		2	27	12	4	1	1	0	0		0	7	8	2	0	0	27	0		2	8	0	10	0	0	2	0
7	9	20	6	0	5	0	0		6	3	7	1	0	1	1	1		2	8	14	3	0	0	7	0		2	5	1	5	1	1	7	0
6	18	35	8	0	4	1	2		8	21	7	7	0	22	0	1		1	9	5	4	0	3	2	0		15	3	4	7	9	1	1	0
5	10	10	8	1	8	1	0		6	7	11	2	2	6	0	0		1	5	12	5	0	0	4	0		0	11	3	2	0	0	0	3
0	11	39	12	0	4	1	0		6	14	12	8	0	0	4	11		2	22	25	3	0	1	0	1		5	4	1	2	0	0	0	0
16	8	16	5	0	1	0	3		4	2	5	3	0	16	2	0		4	4	9	3	6	0	4	2		8	5	1	9	1	1	0	2
9	17	23	15	0	0	1	3		8	12	8	3	0	1	0	1		1	15	8	5	4	2	1	0		1	1	2	6	0	0	1	0
5	7	12	6	0	1	4	3		2	10	8	2	1	8	0	1		0	6	4	7	0	1	0	0		2	14	1	6	0	2	2	2
12	14	26	11	0	3	0	0		7	13	12	0	2	0	6	15		0	12	9	4	0	1	1	9		11	4	2	3	0	2	0	1
10	23	31	9	0	2	2	2		7	16	4	0	4	2	0	0		2	15	11	2	4	0	1	0		4	3	3	2	1	0	1	1
15	5	34	9	0	4	0	2		10	3	5	4	0	7	0	2		0	2	11	7	1	1	0	0		3	5	0	9	0	1	0	3
2	17	17	13	0	3	0	0		5	15	8	3	0	4	1	0		0	10	8	2	0	1	2	0		4	1	7	9	0	2	0	1
5	9	14	12	1	1	3	4		11	12	11	5	0	18	0	1		1	9	3	7	1	17	0	1		1	1	0	11	2	0	0	2
3	26	15	8	0	1	2	0		7	13	8	8	0	2	11	0		0	11	17	1	1	2	1	1		4	2	3	7	0	0	1	0
5	6	10	8	1	0	0	0		8	14	3	4	0	0	8	0		2	5	14	7	0	3	0	1		4	5	1	3	0	0	2	0
7	2	11	9	0	4	1	1		4	4	10	2	2	0				3	1	13	3	0	0	1	0		4	6	3	4	0	0	1	0
5	13	21	7	0	1	0	0		3	16	5	4	0	1				2	2	33	2	6	0	11	0		6	1	0	6	1	0	1	4
5	31	22	3	0	1	1	1		5	13	10	0	0	1				2	5	17	3	0	3	0	3		3	4	4	0	0	9	1	1
6	17	33	8	0	1	0	2		8	13	7	3	0	0				2	17	5	7	0	0	0	0		2	7	3	7	0	1	0	0
13	4	17	6	0	0	0	0		4	22	11	2	0	8				0	7	5	10	7	10	2	0		1	0	4	7	1	0	0	0
4	24	22	8	0	1	1	0		5	9	12	1	0	4				2	18	19	0	0	0	0	0		14	2	2	1	0	2	1	1
1	29	19	7	1	0	1	1		7	16	11	7	0	0				6	13	6	8	0	0	0	1		1	4	4	0	0	0	0	0
1	24	12	4	0	2	3	0		6	11	9	2	1					4	20	6	3	0	4	1	0		1	3	1	10	0	0	2	0
	9	23	6	0	1	0	0		4	11	7	3	0					3	2	4	5	1	1	1	1		7	3	0	7	0	0	0	0
	18	6		0	1	2	0		6	8	6	1	0					4	8	8	7	0	18		0		3	6	6	5	0	1	0
	26	22		0	2	0	1		4	15	15	3	0					2	5	12	7		0		0		1	3	2	4		1	2
	18	13		1	1	0	0		7	16	8	7	0					9	9	12	5		2		0		1	4	2	8		0	0
	28	6		1	0	0	0		6	6	9	2						2	6	5	5		0				6	0	3	17		1	0
	17	29		0	0	0	0		7	10	13	9						1	12	12	0		0				1	7	4	8		3	2
	9	19		0	0	5	2		2	10	8	7						4	6	23	4		0				0	3	0	3		0	0
	32	23		0	1	1			4	11	10	6						4	13	19	7		8				6	4	2	1		0	0
	27	13		0	2	3			7	18	3	3						3	10	14	0		1				2	3	3	1		0	2
	14	13		0	0	0			3	8	9	4						5	4	6	8		0				0	2	3	4		0	1
	11	6		1	0	1			6	16	9	3						3	24	7	4		0				4	4	9	9		0	2
	20	10		0	0	0			5	15	4	5						5	15	11	3		7				7	1	4	7		0	0
	11	7		0	0	0			4	6	17	2						5	5	2	1		4				1	2	3	6		2
	15				0	5			15	7	15	4						1	3	9	3		28				5	2	2	4
	20					0			3	14	5	5						2	3	6	1		1				0	1	2	3
	8					1			3	8	6	6						3	13	8	1		0				6	4	0	4
	38					1			4	2	18	1						2		6	2		0				1	0	2	3
	26					1			6	3	4	3						1		3	3		1				3	4	4	6
	23					3			2	0	8	3						2			4		1				11	1	1	3
	10					0			7	0	5	1						2			1		0				3	0	4	1
	16					2			5	0	9	2						0			3		1				2	0	3	4
	8					0			1	0	8	0						0			9		2				0	4	1	4
	12					1			5	0	9	0						6			1		0				2	1	0	11
									1	0	4	3						4			0						2	5	11	2
									4	0	4	4						1			2						1	1	4	10
									3	0	5	2						3			5						3	1	3	10
									0	0	6	3						7			1						2	1	2	1
									0	0	13	6						1			2						0	9	3	8
									0	0	12	2						1									3	3	10	19
									0	0	10	4						0									1	6	1	3
									0	0	6	6						1									4	0	6	5
									0	0	8	6						3									4	1	0	8
									0	0	9	5						3									3	0	9	1
									0	0	3	7						1									1	4	2	0
									0	0	7	4						0									1	5	5	8
									0	0	2	4						2									8	3	0	6
									0	0	1	6															1	7	2	6
									0	0	0	3															1	1	0	8
									0	0	0	4															6	0	11	3
									0	0	0	4															2	1	3	3
									0	0	0	4															3	2	1	2
									0	0	0	2															4	0	4	9
									0	0	0	1															2	0	3	7
									0	0	0	5															1	0	1	11
									0	0	0	5															2	0	1	7
									0	0	0	4															4	0	1	3
									0	0	0	4															0	0	2	1
									0	0	0	12															0	0	2	1
									0	0	0	4															0	0	0	2
									0	0	0	3															0	0	7	4
									0	0	0	4															0	0	2	7
									0	0	0	2															0	0	0	9
									0	0	0	4															0	0	1	6
									0	0	0	4															0	0	3	4
									0	0	0	11															0	0	3	8
									0	0	0	7															0	0	6	7
									0	0	0	3															0	0	7	4
									0	0	0	11															0	0	1	7
									0	0	0	11															0	0	3	7
									0	0	0	6															0	0	1	6
									0	0	0	3															0	0	5	2
									0	0	0	5															0	0	10	1
									0	0	0	6															0	0	1	0
									0	0	0	2															0	0	3	0
									0	0	0	4															0	0	6	0
									0	0	0	5															0	0	4	0
									0	0	0	4															0	0	5	0
									0	0	0	9															0	0	0	0
									0	0	0	5															0	0	5	0
									0	0	0	6															0	0	3	0
									0	0	0	3															0	0	3	0
									0	0	0	3															0	0	1	0
									0	0	0	5															0	0	0	0
									0	0	0	1															0	0	0	0
									0	0	0	8															0	0	0	0
									0	0	0	3															0	0	0	0
									0	0	0	0															0	0	0	0
									0	0	0	0															0	0	0	0
									0	0	0	3															0	0	0	0
									0	0	0	5															0	0	0	0
									0	0	0	4															0	0	0	0
									0	0	0	7															0	0	0	0
									0	0	0	6															0	0	0	0
									0	0	0	4															0	0	0	0
									0	0	0	1															0	0	0	0
									0	3	0	2															0	0	0	0
									0	6	0	4															0	0	0	0
									0	6	0	0															0	0	0	0
									0	7	0																0	0	0	0
									0	10	0																0	0	0	0
									0	6	0																0	0	0	0
									0	13	0																0	0	0	0
									0	10	0																0	0	0	0
									0	10	0																0	0	0	0
									5	11	0																0	0	0	0
									0	7	0																0	0	0	0
									3	4	0																0	0	0	0
									11	3	0																0	0	0	0
									1	3	0																0	0	0	0
									1	11	0																0	0	0	0
									12	15	0																0	0	0	0
									7	16	0																0	0	0	0
									3	1	0																0	0	0	0
									4	4	0																0	0	0	0
									2	7	0																0	0	0	0
									9	4	0																0	0	0	0
									8	13	0																0	0	0	0
									6	4	0																0	0	0	0
									10	3	0																0	0	0	0
									6	10	0																0	0	0	0
									4	16	0																0	0	0	0
									10	3	0																0	0	0	0
									6	12	0																0	0	0	0
									13	4	0																0	0	0	0
									20	6	4																0	0	0	0
									4	7	10																0	0	0	0
									9	21	4																0	0	0	0
									10	11	2																0	0	0	0
									9	11	0																0	0	0	0
									9	13	9																0	0	0	0
									8	11	8																0	0	0	0
									7	19	8																0	0	0	0
									6	20	9																0	0	0	0
									1	10	8																0	0	0	0
									9	11	8																0	0	0	0
									7	7	6																0	0	0	0
									6	11	6																0	0	0	0
									5	19	17																0	0	0	0
									4	17	9																0	0	0	0
									5	9	4																0	0	0	0
									3	14	8																0	0	0	0
									9	11	9																0	1	0	0
									11	23	10																0	2	0	0
									4	8	11																0	2	0	0
									13	12	9																0	7	0	0
									8	8	16																0	1	0	0
									6	17	9																0	6	0	0
									3	2	6																0	10	0	0
									15	14	17																0	3	0	0
									6	4	21																0	5	0	0
									8	4	10																0	2	0	0
									10	3	3																0	3	0	0
									10	11	12																3	3	0	0
									4	11	15																1	6	0	0
									3	13	11																12	6	0	0
									6	8	4																5	0	0	0
									4	12	10																2	2	0	0
									4	8	11																4	1	0	0
									7	6	11																4	2	0	0
									5	8	8																6	2	0	0
									5	2	5																5	1	0	0
									2	2	19																1	1	0	0
									4		12																0	10	0	0
									6		9																3	4	0	0
									7		13																7	5	1	0
									2		18																2	5	5	0
									10		4																1	1	2	1
									0		14																11	3	5	4
									0		12																0	6	6	2
									5		9																3	3	2	1
											15																7	5	8	1
											13																5	7	3	2
											12																1	2	3	3
											8																5	2	5	3
											4																7	2	0	1
											10																3	3	0	8
											8																3	6	0	4
											7																0	1	2	13
											14																0	2	1	10
											14																1	6	2	2
											6																2	1	4	6
											9																5	1	3	4
											21																9	6	1	5
											11																6	0	6	7
											5																10	3	4	6
											11																4	2	0	2
											6																4	4	6	3
											7																6	0	1	1
											10																3	0	1	1
											10																7	3	2	2
											17																8	7	7	3
											10																12	1	8	17
											8																2	5	3	6
											8																7	5	3	10
											10																3	1	3	2
											5																1	1	0	16
											7																0	3	2	1
											5																0	1	2	19
											4																2	3	5	0
											3																0	6	2	4
																											6	1	2	4
																											3	2	0	3
																											4	1	2	2
																											3	5	3	1
																											0	5	3	5
																											4	0	4	2
																											5	1	2	1
																											4	1	1	1
																											3	2	3	2
																											3	8	3	1
																											18	1	2	2
																											9	0	1	0
																											2	5	4	4
																											3	3	3	3
																											3	3	3	0
																											2	2	0	4
																											1	2	0	5
																											3	9	0	0
																											2	12	4	8
																											0	3	0	7
																											1	4	13	5
																											7	3	3	1
																											4	6	3	0
																											3	9	1	6
																											3	2	0	3
																											11	3	3	2
																											8	3	1	10
																											3	1	3	0
																											3		0	16
																											8		5	1
																											2		2	6
																											8		1	3
																											2		3	7
																											3		0	0
																											3		5	12
																											1		1	15
																											6		4	5
																											7		1	2
																											3		4	1
																											5		0	4
																											10		4	2
																											9		3	0
																											0		3	14
																											6		0	3
																											2			3
																											2			11
																											3			3
																											0			6
																														1
																														5
																														3
																														3
																														4
																														3
																														6
																														6
																														10
																														4
																														5
																														1
																														0
																														0
																														0
																														0
																														0
																														0
																														0
																														0
																														0
																														0
																														0
																														0
																														0
																														0
																														0
																														0
																														0
																														0
																														0
																														0
																														0
																														0
																														0
																														0
																														0
																														0
																														0
																														0
																														0
																														0
																														0
																														0
																														0
																														0
																														0
																														0
																														0
																														0
																														0
																														0
																														0
																														0
																														0
																														0
																														0
																														0
																														0
																														0
																														0
																														0
																														0
																														0
																														0
																														0
																														0
																														0
																														0
																														0
																														0
																														0
																														0
																														0
																														0
																														0
																														0
																														0
																														0
																														0
																														0
																														0
																														0
																														0
																														0
																														0
																														0
																														0
																														0
																														0
																														0
																														0
																														0
																														0
																														0
																														0
																														0
																														0
																														0
																														0
																														4
																														1
																														3
																														6
																														1
																														4
																														0
																														2
																														0
																														9
																														1
																														8
																														12
																														10
																														8
																														3
																														11
																														4
																														0
																														2
																														3
																														1
																														5
																														2
																														2
																														5
																														4
																														7
																														2
																														5
																														1
																														0
																														1
																														2
																														3
																														7
																														3
																														1
																														1
																														0
																														1
																														11
																														2
																														4
																														2
																														4
																														4
																														6
																														5
																														1
																														4
																														6
																														2
																														15
																														5
																														2
																														6
																														12
																														3
																														2
																														2
																														1
																														13
																														3
																														6
																														3
																														10
																														9
																														1
																														2
																														8
																														0
																														3
																														4
																														2
																														0
																														1
																														5
																														8
																														2
																														8
																														7
																														2
																														11
																														3
																														2
																														5
																														10

## Sheet: Fig. 6B,C-statistics
	Figure 6B: Representative confocal IF images
	Figure 6C: Statistics
	PLA: CC1-CD79B, 0'			PLA: CC1-CD79B, 5'			PLA: CC1-CD79B, 15'			PLA: CC1-CD79B, 30'
	Table Analyzed	CC1-79B 4L,Doppel,dN,itim		Table Analyzed	CC1-79B 4L,Doppel,dN,itim		Table Analyzed	CC1-79B 4L,Doppel,dN,itim		Table Analyzed	CC1-79B 4L,Doppel,dN,itim
	Column I	dN: 0'		Column J	dN: 5'		Column K	dN: 15'		Column L	dN: 30'
	vs.	vs.		vs.	vs.		vs.	vs.		vs.	vs.
	Column A	4L: 0'		Column B	4L: 5'		Column C	4L: 15'		Column D	4L: 30'
	Mann Whitney test			Mann Whitney test			Mann Whitney test			Mann Whitney test
	P value	<0.0001		P value	<0.0001		P value	<0.0001		P value	<0.0001
	Exact or approximate P value?	Approximate		Exact or approximate P value?	Approximate		Exact or approximate P value?	Approximate		Exact or approximate P value?	Approximate
	P value summary	****		P value summary	****		P value summary	****		P value summary	****
	Significantly different (P < 0.05)?	Yes		Significantly different (P < 0.05)?	Yes		Significantly different (P < 0.05)?	Yes		Significantly different (P < 0.05)?	Yes
	One- or two-tailed P value?	Two-tailed		One- or two-tailed P value?	Two-tailed		One- or two-tailed P value?	Two-tailed		One- or two-tailed P value?	Two-tailed
	Sum of ranks in column A,I	21409 , 8726		Sum of ranks in column B,J	27563 , 8753		Sum of ranks in column C,K	26270 , 9777		Sum of ranks in column D,L	20099 , 8822
	Mann-Whitney U	341		Mann-Whitney U	237.5		Mann-Whitney U	46.5		Mann-Whitney U	1196
	Difference between medians			Difference between medians			Difference between medians			Difference between medians
	Median of column A	5.000, n=116		Median of column B	17.00, n=139		Median of column C	17.00, n=129		Median of column D	8.000, n=117
	Median of column I	0.000, n=129		Median of column J	1.000, n=130		Median of column K	1.000, n=139		Median of column L	1.000, n=123
	Difference: Actual	-5		Difference: Actual	-16		Difference: Actual	-16		Difference: Actual	-7
	Difference: Hodges-Lehmann	-5		Difference: Hodges-Lehmann	-15		Difference: Hodges-Lehmann	-17		Difference: Hodges-Lehmann	-6
	PLA: CC1-LYN, 0'			PLA: CC1-LYN, 5'			PLA: CC1-LYN, 15'			PLA: CC1-LYN, 30'
	Table Analyzed	CC1-LYN, 4L,doppel,delN		Table Analyzed	CC1-LYN, 4L,doppel,delN		Table Analyzed	CC1-LYN, 4L,doppel,delN		Table Analyzed	CC1-LYN, 4L,doppel,delN
	Column I	dN: 0'		Column J	dN: 5'		Column K	dN: 15'		Column L	dN: 30'
	vs.	vs.		vs.	vs.		vs.	vs.		vs.	vs.
	Column A	4L: 0'		Column B	4L: 5'		Column C	4L: 15'		Column D	4L: 30'
	Mann Whitney test			Mann Whitney test			Mann Whitney test			Mann Whitney test
	P value	<0.0001		P value	<0.0001		P value	<0.0001		P value	0.3669
	Exact or approximate P value?	Approximate		Exact or approximate P value?	Approximate		Exact or approximate P value?	Approximate		Exact or approximate P value?	Approximate
	P value summary	****		P value summary	****		P value summary	****		P value summary	ns
	Significantly different (P < 0.05)?	Yes		Significantly different (P < 0.05)?	Yes		Significantly different (P < 0.05)?	Yes		Significantly different (P < 0.05)?	No
	One- or two-tailed P value?	Two-tailed		One- or two-tailed P value?	Two-tailed		One- or two-tailed P value?	Two-tailed		One- or two-tailed P value?	Two-tailed
	Sum of ranks in column A,I	24642 , 15828		Sum of ranks in column B,J	20555 , 10322		Sum of ranks in column C,K	25890 , 11786		Sum of ranks in column D,L	17207 , 16204
	Mann-Whitney U	5388		Mann-Whitney U	3767		Mann-Whitney U	4526		Mann-Whitney U	7754
	Difference between medians			Difference between medians			Difference between medians			Difference between medians
	Median of column A	5.000, n=140		Median of column B	9.000, n=134		Median of column C	7.500, n=154		Median of column D	3.000, n=137
	Median of column I	2.000, n=144		Median of column J	4.500, n=114		Median of column K	3.500, n=120		Median of column L	3.000, n=121
	Difference: Actual	-3		Difference: Actual	-4.5		Difference: Actual	-4		Difference: Actual	0
	Difference: Hodges-Lehmann	-3		Difference: Hodges-Lehmann	-4		Difference: Hodges-Lehmann	-3		Difference: Hodges-Lehmann	0
	PLA: CC1-SYK, 0'			PLA: CC1-SYK, 5'			PLA: CC1-SYK, 15'			PLA: CC1-SYK, 30'
	Table Analyzed	CC1-SYK 4L,Doppel,dN,itim		Table Analyzed	CC1-SYK 4L,Doppel,dN,itim		Table Analyzed	CC1-SYK 4L,Doppel,dN,itim		Table Analyzed	CC1-SYK 4L,Doppel,dN,itim
	Column I	dN: 0'		Column J	dN: 5'		Column K	dN: 15'		Column L	dN: 30'
	vs.	vs.		vs.	vs.		vs.	vs.		vs.	vs.
	Column A	4L: 0'		Column B	4L: 5'		Column C	4L: 15'		Column D	4L: 30'
	Mann Whitney test			Mann Whitney test			Mann Whitney test			Mann Whitney test
	P value	<0.0001		P value	<0.0001		P value	<0.0001		P value	<0.0001
	Exact or approximate P value?	Approximate		Exact or approximate P value?	Approximate		Exact or approximate P value?	Approximate		Exact or approximate P value?	Approximate
	P value summary	****		P value summary	****		P value summary	****		P value summary	****
	Significantly different (P < 0.05)?	Yes		Significantly different (P < 0.05)?	Yes		Significantly different (P < 0.05)?	Yes		Significantly different (P < 0.05)?	Yes
	One- or two-tailed P value?	Two-tailed		One- or two-tailed P value?	Two-tailed		One- or two-tailed P value?	Two-tailed		One- or two-tailed P value?	Two-tailed
	Sum of ranks in column A,I	24119 , 12467		Sum of ranks in column B,J	24720 , 12136		Sum of ranks in column C,K	22181 , 9446		Sum of ranks in column D,L	23561 , 11419
	Mann-Whitney U	5446		Mann-Whitney U	2406		Mann-Whitney U	2543		Mann-Whitney U	4159
	Difference between medians			Difference between medians			Difference between medians			Difference between medians
	Median of column A	2.000, n=152		Median of column B	9.000, n=132		Median of column C	8.000, n=134		Median of column D	2.000, n=144
	Median of column I	0.000, n=118		Median of column J	1.000, n=139		Median of column K	1.000, n=117		Median of column L	1.000, n=120
	Difference: Actual	-2		Difference: Actual	-8		Difference: Actual	-7		Difference: Actual	-1
	Difference: Hodges-Lehmann	-1		Difference: Hodges-Lehmann	-7		Difference: Hodges-Lehmann	-6		Difference: Hodges-Lehmann	-1
	PLA: CC1-SHP-1, 0'			PLA: CC1-SHP-1, 5'			PLA: CC1-SHP-1, 15'			PLA: CC1-SHP-1, 30'
	Table Analyzed	CC1-SHP1 4L,Doppel,dN,itim		Table Analyzed	CC1-SHP1 4L,Doppel,dN,itim		Table Analyzed	CC1-SHP1 4L,Doppel,dN,itim		Table Analyzed	CC1-SHP1 4L,Doppel,dN,itim
	Column I	dN: 0'		Column J	dN: 5'		Column K	dN: 15'		Column L	dN: 30'
	vs.	vs.		vs.	vs.		vs.	vs.		vs.	vs.
	Column A	4L: 0'		Column B	4L: 5'		Column C	4L: 15'		Column D	4L: 30'
	Mann Whitney test			Mann Whitney test			Mann Whitney test			Mann Whitney test
	P value	<0.0001		P value	0.0189		P value	0.3362		P value	<0.0001
	Exact or approximate P value?	Approximate		Exact or approximate P value?	Approximate		Exact or approximate P value?	Approximate		Exact or approximate P value?	Approximate
	P value summary	****		P value summary	*		P value summary	ns		P value summary	****
	Significantly different (P < 0.05)?	Yes		Significantly different (P < 0.05)?	Yes		Significantly different (P < 0.05)?	No		Significantly different (P < 0.05)?	Yes
	One- or two-tailed P value?	Two-tailed		One- or two-tailed P value?	Two-tailed		One- or two-tailed P value?	Two-tailed		One- or two-tailed P value?	Two-tailed
	Sum of ranks in column A,I	89350 , 22278		Sum of ranks in column B,J	80242 , 27174		Sum of ranks in column C,K	82648 , 31834		Sum of ranks in column D,L	186517 , 30954
	Mann-Whitney U	15257		Mann-Whitney U	18789		Mann-Whitney U	21223		Mann-Whitney U	24051
	Difference between medians			Difference between medians			Difference between medians			Difference between medians
	Median of column A	0.000, n=354		Median of column B	0.000, n=334		Median of column C	0.000, n=350		Median of column D	0.000, n=542
	Median of column I	0.000, n=118		Median of column J	0.000, n=129		Median of column K	1.000, n=128		Median of column L	0.000, n=117
	Difference: Actual	0		Difference: Actual	0		Difference: Actual	1		Difference: Actual	0
	Difference: Hodges-Lehmann	0		Difference: Hodges-Lehmann	0		Difference: Hodges-Lehmann	0		Difference: Hodges-Lehmann	0
