# Supplementary material for: CEACAM1 Orchestrates Lipid Raft Dynamics and B-cell Receptor Signaling in Mantle Cell Lymphoma
Source: Research Square preprint supplement (doi:10.21203/rs.3.rs-5321424/v1), 2024-11-01
Supplement: Supplementary file 2 [file 1201927dc670245a173d48fe.xlsx]

## Sheet: Suppl. Table 2
Supplementary Table 2:
Gene symbol	Entrez Gene ID for Human	#gRNA with >2-fold depleted
CEACAM1	634	4
CDC25B	994	3
DDIT3	1649	3
MLLT11	10962	3
SLC20A1	6574	3
YWHAQ	10971	3
BCL7B	9275	2
CDKN1C	1028	2
DYRK4	8798	2
TUBA1A	7846	2
PASK	23178	2
VBP1	7411	2
DCTD	1635	2
HADH	3033	2
HCFC1	3054	2
HSPA1A/HSPA1B		2
PGRMC2	10424	2
POLG	5428	2
RABIF	5877	2
STK24	8428	2
IMPDH1	3614	1
