# Supplementary material for: CEACAM1 Orchestrates Lipid Raft Dynamics and B-cell Receptor Signaling in Mantle Cell Lymphoma
Source: Research Square preprint supplement (doi:10.21203/rs.3.rs-5321424/v1), 2024-11-01
Supplement: Supplementary file 3 [file 243cc0fe5be281b7265acf5f.xlsx]

## Sheet: Sheet1
Densitometry		Area	Mean	Min	Max				Mean	minus blank	divide gapdh		Expt1	Expt2	Expt3	Expt4	Expt5	Expt6	Expt7	Avg=	Expt1	Expt2	Expt3	Expt4	Expt5	Expt6	Expt7	Avg=
	1	319	101.834	31	214		pSYK Y352	ST468	101.834	75.234	2.9283	ST468	2.9283	1.00205	0.723839	0.248555	0.507127	0.272709	0.243443	0.846576	3.459	1.18365	0.855019	0.293601	0.599033	0.322132	0.287562	1
	2	319	47.185	24	75			ST468+4L	47.185	20.585	0.87895	ST468+4L	0.87895	0.850811	0.579563	0.0812902	0.332049	0.151489	0.130601	0.42925	1.03824	1.005	0.684596	0.0960224	0.392226	0.178943	0.15427	0.507043
	3	225	26.6	24	29			blank	26.6	0
	4	338	46.553	21	82		GAPDH	ST468	46.553	25.692
	5	338	44.281	19	82			ST468+4L	44.281	23.42
	6	208	20.861	18	27			blank	20.861	0
	7	364	142.769	43	254		pSYK Y352	ST468	142.769	113.192	1.00205
	8	364	127.393	41	239			ST468+4L	127.393	97.816	0.850811				Table Analyzed	ST486+4L pSYK Y352 normalized
	9	208	29.577	22	40			blank	29.577	0
	10	345	132.299	29	255		GAPDH	ST468	132.299	112.96					Column B	ST486+4L
	11	345	134.307	30	255			ST468+4L	134.307	114.968					vs.	vs.
	12	330	19.339	17	30			blank	19.339	0					Column A	ST486
	13	312	102.609	37	219		pSYK Y352	ST468	102.609	72.567	0.723839
	14	312	80.843	37	157			ST468+4L	80.843	50.801	0.579563				Wilcoxon matched-pairs signed rank test
	15	260	30.042	23	40			blank	30.042	0					P value	0.0156
	16	312	118.663	29	255		GAPDH	ST468	118.663	100.253					Exact or approximate P value?	Exact
	17	312	106.064	32	255			ST468+4L	106.064	87.654					P value summary	*
	18	234	18.41	5	24			blank	18.41	0					Significantly different (P < 0.05)?	Yes
	19	325	43.637	26	71		pSYK Y352	ST468	43.637	17.332	0.248555				One- or two-tailed P value?	Two-tailed
	20	325	36.348	25	100			ST468+4L	36.348	10.043	0.0812902				Sum of positive, negative ranks	0.000 , -28.00
	21	275	26.305	21	32			blank	26.305	0					Sum of signed ranks (W)	-28
	22	275	98.844	33	255		GAPDH	ST468	98.844	69.731					Number of pairs	7
	23	275	152.658	51	255			ST468+4L	152.658	123.545					Number of ties (ignored)	0
	24	150	29.113	23	40			blank	29.113	0
	25	312	56.135	22	124		pSYK Y352	ST468	56.135	34.51	0.507127				Median of differences
	26	312	49.122	23	106			ST468+4L	49.122	27.497	0.332049				Median	-0.1787
	27	312	21.625	18	27			blank	21.625	0
	28	350	92.103	26	255		GAPDH	ST468	92.103	68.05					How effective was the pairing?
	29	350	106.863	28	255			ST468+4L	106.863	82.81					rs (Spearman)	0.9643
	40	225	24.053	19	38			blank	24.053	0					P value (one tailed)	0.0014
	30	325	56.828	29	93		pSYK Y352	ST468	56.828	22.949	0.272709				P value summary	**
	31	325	47.378	31	69			ST468+4L	47.378	13.499	0.151489				Was the pairing significantly effective?	Yes
	41	207	33.879	27	40			blank	33.879	0
	32	312	110.33	27	255		GAPDH	ST468	110.33	84.152
	33	338	115.287	28	255			ST468+4L	115.287	89.109
	42	208	26.178	20	41			blank	26.178	0
	34	312	57.554	32	92		pSYK Y352	ST468	57.554	24.877	0.243443
	35	312	47.766	30	69			ST468+4L	47.766	15.089	0.130601
	36	260	32.677	23	44			blank	32.677	0
	37	260	126.215	30	255		GAPDH	ST468	126.215	102.188
	38	260	139.562	38	255			ST468+4L	139.562	115.535
	39	182	24.027	12	35			blank	24.027	0
