# Supplementary material for: CEACAM1 Orchestrates Lipid Raft Dynamics and B-cell Receptor Signaling in Mantle Cell Lymphoma
Source: Research Square preprint supplement (doi:10.21203/rs.3.rs-5321424/v1), 2024-11-01
Supplement: Supplementary file 4 [file 3ab87c5e21bab29e33840bac.xlsx]

## Sheet: Fig 3G statistics
Median-centered mRNA expression				Fig. 3G: Statistics
CEACAM1				Table Analyzed	CEACAM1 median centered fr GSE70910 Saba etal
PB (n=17)	LN (n=4)
-0.148584	-0.098376			Column B	LN (n=4)
-0.750635	0.652666			vs.	vs.
-0.213195	1.22161			Column A	PB (n=17)
-1.2344	0.588864
-0.479664				Unpaired t test with Welch's correction
-0.342196				P value	0.0422
0.610313				P value summary	*
0.067133				Significantly different (P < 0.05)?	Yes
-2.08999				One- or two-tailed P value?	Two-tailed
-1.39571				Welch-corrected t, df	t=2.509, df=6.641
0.092512
0				How big is the difference?
0.066857				Mean of column A	-0.2465
-0.571279				Mean of column B	0.5912
0.569205				Difference between means (B - A) ± SEM	0.8377 ± 0.3339
1.20164				95% confidence interval	0.03946 to 1.636
0.426969				R squared (eta squared)	0.4866
				F test to compare variances
				F, DFn, Dfd	2.235, 16, 3
				P value	0.5549
				P value summary	ns
				Significantly different (P < 0.05)?	No
				Data analyzed
				Sample size, column A	17
				Sample size, column B	4

## Sheet: Fig 3H IC50
Fig. 3H: IC50 calculation
		Jeko-1	Mino	SP53	Maver-1	Z-138	K1718	SSK41
	Absolute IC50, X is concentration	Ambiguous	Ambiguous	Ambiguous	Ambiguous	Ambiguous	Ambiguous	Ambiguous
	Best-fit values
	Top	100.3	101.6	100	100.2	97.88	99.43	103
	Baseline	~ -0.4605	~ 2.412	~ -19.62	~ 27361600553	~ -2997	~ -1.429	~ 93.41
	Bottom	-0.2921	-21.65	-0.1215	~ 109.9	~ -9641437356340	-38.5	94
	AbsoluteIC50	~ 0.8534	~ 2.757	~ 0.09844	~ 15.92	~ 27.27	~ 2.193	~ 5.223
	HillSlope	-1.526	-1.338	-1.65	~ -109.5	~ -3.507	-0.9534	~ -18.85
	LogAbsoluteIC50	~ -0.06884	~ 0.4405	~ -1.007	~ 1.202	~ 1.436	~ 0.3410	~ 0.7179
	95% CI (profile likelihood)
	Top	???	???	???	???	???	???	???
	Baseline	(Very wide)	(Very wide)	(Very wide)	(Very wide)	(Very wide)	(Very wide)	(Very wide)
	Bottom	???	???	???	(Very wide)	(Very wide)	???	???
	AbsoluteIC50	(Very wide)	(Very wide)	(Very wide)	(Very wide)	(Very wide)	(Very wide)	(Very wide)
	HillSlope	???	???	???	(Very wide)	(Very wide)	???	(Very wide)
	LogAbsoluteIC50	(Very wide)	(Very wide)	(Very wide)	(Very wide)	(Very wide)	(Very wide)	(Very wide)
	Goodness of Fit
	Degrees of Freedom	1	1	1	1	1	1	1
	R squared	0.9927	0.9948	1	0	0.9951	0.9935	0.825
	Sum of Squares	53.25	37.74	0.06206	78.83	8.343	43.06	14
	Sy.x	7.297	6.143	0.2491	8.879	2.888	6.562	3.742
	Number of points
	# of X values	6	6	6	6	6	6	6
	# Y values analyzed	6	6	6	6	6	6	6
