# Supplementary material for: CEACAM1 Orchestrates Lipid Raft Dynamics and B-cell Receptor Signaling in Mantle Cell Lymphoma
Source: Research Square preprint supplement (doi:10.21203/rs.3.rs-5321424/v1), 2024-11-01
Supplement: Supplementary file 5 [file 3d658e011c11b0cc7263043d.xlsx]

## Sheet: Suppl. Table 1
Supplementary Table 1: Genes overexpressed in MCL compared to naïve B cells and essential in JEKO-1 CRISPR screen
Gene symbol	Entrez Gene ID for Human	Entrez Gene ID for Mouse	Entrez Gene ID for Rat
ACADM	34	11364	24158
ACD	65057	497652	307798
ACP2	53	11432	24162
ACVR1	90	11477	79558
ACYP1	97	66204	299203
ADAM17	6868	11491	57027
ADM	133	11535	25026
ADPRH	141	11544	25371
AGA	175	11593	290923
AHNAK	79026	66395	191572
AIM2	9447	383619	304987
AIMP2	7965	231872	288480
AIP	9049	11632	282827
AK1	203	11636	24183
AKT1	207	11651	24185
ALAD	210	17025	25374
AMACR	23600	17117	25284
ANAPC5	51433	59008	288671
ANG	283
ANKRD46	157567	68839	299982
ANKS1A	23294	224650	309639
ANXA2	302	12306	56611
ANXA5	308	11747	25673
AOAH	313	27052	498757
AP2M1	1173	11773	116563
AP2S1	1175	232910	65046
AP3B1	8546	11774	309969
ARHGAP4	393	171207	246249
ARL2BP	23568	107566	498910
ATG2A	23130	329015	689688
ATP5F1B	506	11947	171374
ATP6AP1	537	54411	83615
ATP6V0B	533	114143	298451
ATP6V1E1	529	11973	297566
ATRN	8455	11990	83526
ATRX	546	22589	246284
B4GALT2	8704	53418	313536
B4GALT4	8702	56375	303923
BAZ1B	9031	22385	368002
BCL2	596	12043	24224
BCL7B	9275	12054	368001
BICD2	23299	76895	306809
BNIP2	663	12175	300811
BTN3A1	11119
C2CD2	25966	207781	304055
CAMKK2	10645	207565	83506
CAPN1	823	12333	29153
CAPN3	825	12335	29155
CAPNS1	826	12336	29156
CASC3	22794	192160	259170
CASP9	842	12371	58918
CAT	847	12359	24248
CBR4	84869	234309	359725
CCDC130	81576	67736	304656
CCND1	595	12443	58919
CCNT2	905	72949	304758
CCR7	1236	12775	287673
CD5	921	12507	54236
CD27	939	21940	500318
CD46	4179	17221	29333
CD63	967	12512	29186
CD68	968	12514	287435
CD70	970	21948	301132
CDA	978	72269	362638
CDC16	8881	69957	290875
CDC25B	994	12531	171103
CDC42EP3	10602	260409	313838
CDK8	1024	264064	498140
CDK19	23097	78334	309804
CDKN1C	1028	12577	246060
CDR2	1039	12585	308958
CEACAM1	634
CEP57	9702	74360	315423
CEP164	22897	214552	363055
CETN2	1069	26370	84593
CFP	5199	18636	299314
CHAF1A	10036	27221	363333
CLASP1	23332	76707	304740
CLK3	1198	102414	171305
CLMN	79789	94040	299285
CLPTM1	1209	56457	292696
CLSTN1	22883	65945	313717
CNPY2	10330	56530	685814
CNR1	1268	12801	25248
CNTN1	1272	12805	117258
COG2	22796	76332	690961
COG4	25839	102339	361407
COL9A3	1299	12841	362285
COX11	1353	69802
COX6A2	1339	12862	25278
CPOX	1371	12892	304024
CREBL2	1389	232430	362453
CRIP1	1396	12925	691657
CRYM	1428	12971	117024
CTDP1	9150	67655	291414
CTDSP2	10106	52468
CYB5R3	1727	109754	25035
CYC1	1537	66445	300047
CYP2E1	1571	13106	25086
DAG1	1605	13138	114489
DAPK3	1613	13144	64391
DCAF8	50717	98193	364050
DCAF11	80344	28199	305895
DCTD	1635	320685	290741
DDIT3	1649	13198	29467
DDX42	11325	72047	303607
DELE1	9812	66839	307480
DFFB	1677	13368	84359
DGKZ	8525	104418	81821
DHCR24	1718	74754	298298
DHODH	1723	56749	65156
DHX8	1659	217207	287727
DHX16	8449	69192	294232
DLST	1743	78920	299201
DMD	1756	13405	24907
DNAJB6	10049	23950	362293
DNAJC11	55735	230935	362666
DNAJC13	23317	235567	363127
DUT	1854	110074	497778
DVL3	1857	13544	303811
DYNC1H1	1778	13424	29489
DYRK4	8798	101320	312721
EIF1	10209	20918	287703
EIF2B4	8890	13667	117019
ELF2	1998	69257	361944
ELP1	8518	230233	140934
EMD	2010	13726	25437
ERH	2079	13877	681415
EXOSC10	5394	50912	313707
EXTL2	2135	58193	310803
EXTL3	2137	54616	56819
FAM114A1	92689
FAM131A	131408	78408
FAM168B	130074	214469	690188
FAM193A	8603	231128	305452
FAM50A	9130	108160	293862
FAM89B	23625	17826	309170
FBXO7	25793	69754	366854
FBXO9	26268	71538	300849
FCGR2B	2213
FNBP4	23360	55935	311183
FOSB	2354	14282
FOXJ3	22887	230700	313554
FTO	79068	26383	291905
FYN	2534	14360	25150
GAB2	9846	14389	84477
GCLC	2729	14629	25283
GGH	8836	14590	25455
GOLGA3	2802	269682	312077
GPATCH8	23131	237943	685233
GRN	2896	14824	29143
GRSF1	2926	231413	305256
GTF2E1	2960	74197	303918
GTF2H4	2968	14885	294236
GTF3C1	2975	233863	171063
GUSB	2990	110006	24434
HADH	3033	15107	113965
HADHB	3032	231086	171155
HBP1	26959	73389	27080
HCFC1	3054	15161	363519
HDAC3	8841	15183	84578
HDAC5	10014	15184	84580
HDAC6	10013	15185
HERPUD1	9709	64209	85430
HIVEP1	3096	110521	117140
HLX	3142	15284	364069
HMGXB3	22993	106894	361335
HMGXB4	10042	70823	307667
HSPA6	3310
HSPA1A/HSPA1B
HTT	3064	15194	29424
ICE1	23379	218333	306665
IDUA	3425	15932	360904
IFRD2	7866	15983	300994
IL10RA	3587	16154	117539
IL11RA
IMPA2	3613	114663	282636
IMPDH1	3614	23917	362329
ING1	3621	26356	306626
INPP4A	3631	269180	80849
IPO13	9670	230673	116458
IRF5	3663	27056	296953
ISCA1	81689	69046	290985
ISCU	23479	66383	288740
ITGA7	3679	16404	81008
ITGB7	3695	16421	25713
JADE2	23338	76901	303113
JPT2	90861	52009	360492
KANK1	23189	107351	309429
KAT5	10524	81601	192218
KCTD2	23510	70382	498024
KCTD7	154881	212919	688993
KDM2A	22992	225876	361700
KEAP1	9817	50868	117519
KIAA1109	84162	229227	294978
KIDINS220	57498	77480	116478
KIF3C	3797	16570	85248
KLC1	3831	16593	171041
KLF6	1316	23849	58954
KLHDC10	23008	76788	312199
KPNB1	3837	16211	24917
LAMC1	3915	226519	117036
LAMP2	3920	16784	24944
LAS1L	81887	76130	296865
LASP1	3927	16796	29278
LGALS1	3956	16852	56646
LILRA4	23547
LPCAT4	254531	99010	296048
LPGAT1	9926	226856	679692
LRPAP1	4043	16976	116565
LRPPRC	10128	72416	313867
LSS	4047	16987	81681
MAP1LC3B	81631	67443	64862
MAPK9	5601	26420	50658
MAPK8IP3	23162	30957	302983
MAPKAPK5	8550	17165	498183
MBD1	4152	17190	291439
MCM3AP	8888	54387	294339
MDM1	56890	17245	314859
MDN1	23195	100019	362498
MED12	9968	59024	679693
MED13L	23389	76199	360817
METTL7A
MKRN1	23608	54484	296988
MLLT11	10962	56772	295264
MLX	6945	21428	360631
MMD	23531	67468	303439
MOAP1	64112	64113	299261
MRPS11	64963	67994	499185
MSL1	339287	74026	303514
MT1A	4489
MTERF4	130916	69821	363289
MTMR1	8776	53332	317296
MTMR3	8897	74302	305482
MTSS1	9788	211401	362918
MVD	4597	192156	81726
MXI1	4601	17859	25701
MYO1F	4542	17916	314654
MZF1	7593	109889	361508
NAA80	24142	56441	100910872
NBAS	51594	71169	690073
NCOR2	9612	20602	360801
NDRG1	10397	17988	299923
NDUFA9	4704	66108	362440
NDUFAB1	4706
NEMP1	23306	210035	679504
NEU1	4758	18010	24591
NFE2L1	4779	18023	360610
NPEPPS	9520	19155	50558
NPTN	27020
NQO2	4835	18105	291084
NRDC	4898	230598	25499
NSF	4905	18195	60355
NSL1	25936	381318	498310
NXF1	10482	53319	59087
OGDH	4967	18293	360975
OSBPL3	26031	71720	362360
OTUD3	23252	73162	500572
OVGP1	5016	12659
PACS2	23241	217893	691631
PAIP1	10605	218693	365684
PAN2	9924	103135	408200
PARN	5073	74108	360464
PASK	23178	269224	301617
PBXIP1	57326	229534	310644
PCCA	5095	110821	687008
PCF11	51585	74737	361605
PDCD6	10016	18570	308061
PDE1B	5153	18574	29691
PEG10	23089	170676
PFKM	5213	18642	65152
PGM1	5236	72157	24645
PGRMC2	10424	70804	361940
PHF8	23133	320595	317425
PHKG2	5261	68961	140671
PIAS3	10401	229615	83614
PIM1	5292	18712	24649
PIN1	5300	23988	298696
PJA2	9867	224938	192256
PLA2G6	8398	53357	360426
PLA2G15	23659	192654	361401
PLAAT4	5920
PMM1	5372	29858	300089
PNPLA6	10908	50767	360753
POFUT2	23275	80294	309686
POLD3	10714	67967	293144
POLG	5428	18975	85472
POLR2E	5434	66420	690966
POLRMT	5442	216151	299604
PPID	5481
PPIP5K1	9677	327655	311355
PPP1R13B	23368	21981	314465
PPP1R15A	23645	17872	171071
PPP2CA	5515	19052	24672
PPP2R5B	5526	225849	309179
PRKCZ	5590	18762	25522
PRMT1	3276	15469	60421
PRPF18	8559	67229	171552
PRPS1L1	221823	75456	298954
PRUNE1	58497	229589	310664
PSME4	23198	103554	498433
PYGM	5837	19309	24701
RAB11A	8766	53869	81830
RABIF	5877	98710	304807
RANBP1	5902	19385	360739
RANBP3	8498	71810	501281
RARS1	5917	104458	287191
RASA4	10156
RASGRF1	5923	19417	192213
RBM14	10432	56275	170900
RBM19	9904	74111	304512
RBM42	79171	68035	361545
RBMX2	51634	209003	367930
RECQL4	9401	79456	300057
REEP5	7905	13476	364838
RENBP	5973	19703	81759
RETREG3	162427	67998	360632
RHOC	389	11853	295342
RNF10	9921	50849	288710
RNPEP	6051	215615	81761
RRAGB	10325	245670	117043
RRAS2	22800	66922	365355
RTF1	23168	76246	366169
RWDD3	25950	66568	65026
RYK	6259	20187	140585
RYR1	6261	20190	114207
S100A13	6284	20196	295213
SART3	9733	53890	304582
SCRN1	9805	69938	502776
SEC14L1	6397	74136	360668
SEC31B	25956	240667	309433
SF3A3	10946	75062	313583
SH2B1	25970	20399	89817
SH3GLB1	51100	54673	292156
SIAH1	6477	20437	140941
SLC12A3	6559	20497	54300
SLC16A3	9123	80879	80878
SLC20A1	6574	20515	81826
SLC22A18	5002	18400	309131
SLC23A2	9962	54338	50622
SLC25A12	8604	78830	362145
SLC35A2	7355	22232
SLC35D2	11046	70484	290959
SLC38A10	124565	72055	303740
SLC7A6	9057	330836	307811
SLC7A7	9056	20540	83509
SMARCB1	6598	20587	361825
SMG7	9887	226517	360855
SMNDC1	10285	76479	287768
SNN	8303	20621	29140
SNRNP70	6625	20637	361574
SNRPA	6626	53607	292729
SNTA1	6640	20648	362242
SNX27	81609	76742	260323
SOD1	6647	20655	24786
SON	6651	20658	304092
SOX11	6664	20666	84046
SPG7	6687	234847	353231
SPG11	80208	214585	311372
SPOUT1	51490	227695	499770
SQSTM1	8878	18412	113894
SRRM1	10250	51796	313620
SRRM2	23524	75956	302969
SRSF4	6429	57317	362612
SRSF6	6431	67996	362264
SS18L1	26039	269397	192352
SSRP1	6749	20833	81785
STAG2	10735	20843	313304
STAMBP	10617	70527	171565
STARD5	80765	170460	502348
STARD7	56910	99138	296128
STK24	8428	223255	361092
STRN3	29966	94186	114520
SUPT6H	6830	20926	303281
SYMPK	8189	68188	292683
TAF6	6878	21343	288533
TAF7	6879	24074	307485
TAF1C	9013	21341	361420
TAF5L	27097	102162	307927
TARBP1	6894	212728	679346
TBC1D9B	23061	76795	360520
TBCE	6905	70430	361255
TCEAL1	9338	237052	302593
THAP3	90326	69876	362667
THAP11	57215	59016	307806
TMED9	54732	67511	361207
TMEM151B	441151	210573	301253
TMEM8B	51754	242409	313490
TNFAIP2	7127	21928	299339
TNFRSF10B	8795	21933
TNFRSF13B	23495	57916
TP53I3	9540
TRAF4	9618	22032	303285
TRAPPC3	27095	27096	362599
TRIM16	10626	94092	303214
TRRAP	8295	100683	288471
TSC2	7249	22084	24855
TSG101	7251	22088	292925
TUBA1A	7846	22142	64158
TXN	7295	22166	116484
TYROBP	7305	22177	361537
UBE2E3	10477	22193	295686
UBE2G2	7327	22213	294331
UBOX5	22888	140629	296161
UBR4	23352	69116	313658
UBXN2B	137886	68053	312965
UFD1	7353	22230	84478
UNC50	25972	67387	192356
VBP1	7411	22327	681825
VDAC3	7419	22335	83532
VIM	7431	22352	81818
VOPP1	81552	232023	362374
VPS8	23355	209018	287990
VPS39	23339	269338	362199
VPS13D	55187	230895	313825
VPS26A	9559	30930	361846
WASF1	8936	83767	294568
WIPI2	26100	74781	288498
YIPF3	25844	28064	301245
YWHAQ	10971
ZBTB17	7709	22642	313666
ZBTB20	26137	56490	288105
ZBTB25	7597	109929	314245
ZBTB48	3104	100090	362668
ZC3H11A	9877	70579	360845
ZDHHC18	84243	503610	362613
ZFHX3	463	11906	307829
ZFPL1	7542	81909	684755
ZNF23	7571	234725	307839
ZNF101	94039
ZNF133	7692		499900
ZNF146	7705	26465
ZNF710	374655	209225	293044
ZNF354A	6940
ZNHIT3	9326	448850	497975
