# Supplementary material for: CEACAM1 Orchestrates Lipid Raft Dynamics and B-cell Receptor Signaling in Mantle Cell Lymphoma
Source: Research Square preprint supplement (doi:10.21203/rs.3.rs-5321424/v1), 2024-11-01
Supplement: Supplementary file 6 [file 4946256ff0d28e953fa77247.xlsx]

## Sheet: Fig. A,B-Signal counts
PLA signal counts/cell									PLA signal counts/cell
JEKO-1									MINO
PLA: CC1-SYK				PLA: CC1-SHP-1					PLA: CC1-SYK				PLA: CC1-SHP-1
0'	5'	15'	30'	0'	5'	15'	30'		0'	5'	15'	30'	0'	5'	15'	30'
0	0	0	0			0			0	0	0	0	0	0	0	0
0	2	0	0			3			0	0	0	0	0	0	0	0
0	2	0	0			0			0	0	0	0	0	0	0	0
0	2	0	0			0			0	0	0	0	0	0	0	0
0	2	0	0			7			0	0	0	0	0	0	0	0
0	3	0	1			1			0	0	0	0	0	0	0	0
0	3	0	1			1			0	0	0	0	0	0	0	0
0	3	0	1			0			0	0	0	0	0	0	0	0
0	3	0	1			4			0	0	0	0	0	0	0	0
1	3	0	1			0			0	0	0	0	0	0	0	0
1	4	0	1			16			0	0	0	0	0	0	0	0
1	4	0	1			7			0	0	0	0	0	0	0	0
1	4	0	1			1			0	0	0	0	0	0	0	0
1	4	0	1			5			0	0	0	0	0	0	0	0
1	4	1	1			4			0	0	0	0	0	0	0	0
1	4	1	1			4			0	0	0	0	0	0	0	0
1	4	1	1			12			0	0	0	0	0	0	0	0
1	4	2	1			18			0	0	0	0	0	0	0	0
1	4	2	2			4			0	0	0	0	0	0	0	0
1	4	2	2			0			0	0	0	0	0	0	0	0
1	4	2	2			5			0	0	0	0	0	0	0	0
1	4	2	2			15			0	0	0	0	0	0	0	0
1	4	2	2			12			0	0	0	0	0	0	0	0
1	4	2	2			0			0	0	0	0	0	0	0	0
1	4	2	2			11			0	0	0	0	0	0	0	0
1	4	2	2			3			0	0	0	0	0	0	0	0
1	4	3	2			2			0	0	0	0	0	0	0	0
1	4	3	2			4			0	0	0	0	0	0	0	0
1	4	3	2			7			0	0	0	0	0	0	0	0
1	4	3	2			1			0	0	0	0	0	0	0	0
1	4	3	2			12			0	0	0	0	0	0	0	0
2	4	3	3			2			0	0	0	0	0	0	0	0
2	4	3	3			0			0	0	0	0	0	0	0	0
2	4	3	3			3			0	0	0	0	0	0	0	0
2	4	3	3			1			0	0	0	0	0	0	0	0
2	4	3	3			3			0	0	0	0	0	0	0	0
2	4	4	3			17			0	0	0	0	0	0	0	0
2	4	4	4			15			0	0	0	0	0	0	0	0
2	5	4	4			19			0	0	0	0	0	0	0	0
2	5	4	4			7			0	0	0	0	0	0	0	0
2	5	4	4			0			0	0	0	0	0	0	0	0
2	5	4	4			1			0	0	0	0	0	0	0	0
2	5	4	4			21			0	0	0	0	0	0	0	0
2	5	4	4			10			0	0	0	0	0	0	0	0
2	5	4	4			5			0	0	0	0	0	0	0	0
2	5	4	4			17			0	0	0	0	0	0	0	0
3	5	4	4			3			0	0	0	0	0	0	0	0
3	5	4	4			2			0	0	0	0	0	0	0	0
3	6	4	4			7			0	0	0	0	0	0	0	0
3	6	4	4			12			0	0	0	0	0	0	0	0
3	6	4	4			6			0	0	0	0	0	0	0	0
3	6	4	4			6			0	0	0	0	0	0	0	0
4	6	4	4			0			0	0	20	0	0	0	0	0
4	6	4	4			0	11		0	0	8	0	0	0	0	0
4	6	4	5			11	11		0	0	9	0	0	0	0	0
4	6	4	5			10	12		0	0	1	0	0	0	0	0
4	7	4	5			0	10		0	0	15	0	0	0	0	0
4	7	4	5		11	6	6		0	8	16	0	0	0	0	0
5	7	4	5		16	4	32		0	6	36	0	0	0	9	11
5	7	4	5		5	8	17		0	1	6	0	0	1	2	2
5	7	4	5		8	0	16		0	20	8	0	0	2	1	10
5	7	4	5		13	3	6		0	19	24	0	0	5	9	3
5	8	4	5		2	0	9		0	13	18	0	0	1	5	3
5	8	4	5	8	22	0	17		0	21	17	0	0	6	13	7
5	8	5	5	26	10	7	24		0	26	29	0	0	2	3	8
5	9	5	6	19	14	1	24		0	9	20	0	4	1	18	15
5	9	5	6	7	6	1	11		0	26	18	0	3	7	4	1
5	9	5	6	12	20	0	4		6	25	28	0	6	2	8	1
5	9	5	6	5	16	4	21		4	18	14	0	1	5	1	10
5	9	5	6	10	30	0	13		3	9	32	0	3	2	9	3
5	9	5	6	19	22	16	17		3	19	16	0	2	0	6	17
5	9	5	6	22	22	7	19		3	10	24	0	4	6	0	3
5	9	5	6	9	12	1	18		2	32	24	0	5	4	7	14
5	9	5	6	19	22	5	9		1	20	8	0	0	4	3	13
5	9	5	6	12	18	4	15		5	14	16	0	5	7	9	5
5	9	6	6	15	15	4	18		1	17	6	2	1	7	7	4
5	9	6	6	8	26	12	1		7	10	14	1	2	19	7	14
5	9	6	6	24	28	18	23		4	19	8	6	2	18	6	5
5	9	6	6	7	25	4	10		5	10	19	0	5	1	1	11
5	9	6	7	13	14	0	10		11	5	23	2	2	1	0	8
5	9	6	7	17	21	5	12		10	10	20	4	1	12	10	10
5	9	6	7	6	15	15	0		1	12	17	7	1	4	3	2
5	9	6	7	19	10	12	18		4	20	13	6	1	9	4	6
6	9	6	7	21	24	0	16		3	12	19	0	2	7	11	5
6	10	6	7	14	13	11	15		13	28	22	1	2	0	5	11
7	10	7	7	8	19	3	11		2	18	14	1	3	6	2	12
7	10	7	7	16	24	2	22		8	16	27	2	3	8	14	1
7	10	7	7	15	21	4	13		4	2	19	10	6	7	6	4
7	10	7	7	17	10	7	21		2	16	20	2	1	11	12	2
7	10	7	7	14	20	1	8		2	13	14	9	0	7	6	5
7	10	7	8	28	14	12	7		4	0	14	0	3	11	1	10
7	10	7	8	6	8	2	4		1	8	24	3	10	6	5	10
7	10	7	8	4	7	0	26		6	8	8	8	6	5	12	6
7	10	7	8	13	24	3	25		2	12	12	2	4	16	3	9
7	10	7	8	19	14	1	11		5	16	29	8	0	11	3	2
7	10	7	8	7	8	3	29		6	8	20	18	5	9	4	5
7	10	7	8	11	8	17	18		4	10	17	9	4	1	10	13
8	10	8	8	11	24	15	2		0	1	22	10	0	10	2	5
8	10	8	8	8	16	19	17		2	0	8	5	3	9	2	6
8	10	8	8	14	14	7	18		0	10	13	5	2	3	7	14
8	10	8	8	8	19	0	16		2	0	10	6	6	5	5	8
8	10	8	8	5	9	1	14		3	11	7	8	4	10	3	18
8	10	8	8	15	24	21	15		2	11	6	3	3	8	5	6
8	11	8	8	22	17	10	10		2	10	1	4	3	5	8	10
8	11	8	9	5	25	5	21		7	16	0	9	6	21	6	15
8	11	8	9	14	14	17	6		4	13	0	18	5	15	0	10
8	12	8	9	10	15	3	1		7	14	0	4	6	3	3	10
8	12	8	9	9	0	2	17		1	1	0	7	5	5	6	7
9	12	8	9	16	8	7	14		3	10	0	8	2	0	4	3
9	12	8	9	11	11	12	12		10	0	0	0	4	10	7	1
9	12	8	9	20	36	6	1		6	0	0	3	1	1	6	4
9	12	8	9	8	19	6	10		4	4	0	14	4	4	16	6
9	12	8	9	18	15	0	7		4	8	0	5	3	10	9	3
9	12	8	9	16	14	0	28		2	4	0	16	3	5	12	1
9	12	9	9	9	13	11	0		2	0	0	3	2	5	2	1
9	12	9	10	11	10	10	50		6	0	0	4	0	7	3	2
9	13	9	10	18	0	0	19		6	0	0	7	0	2	0	0
9	13	9	10	1	2	6	7		0	0	0	6	3	4	0	0
9	13	9	10	24	5	4	13		5	0	0	4	1	0	0	0
9	13	10	10	7	0	8	19		8	0	0	12	2	0	0	0
9	13	10	10	4	7	0	42		2	0	0	2	2	0	0	0
10	13	10	11	13	4	3	16		4	0	0	1	9	0	0	0
10	13	10	11	8	2	0	33		2	0	0	1	1	0	0	0
10	13	10	11	14	4	0	6		5	0	0	2	2	0	0	0
10	13	10	11	4	6	7	10		0	0	0	1	2	0	0	0
10	13	10	11	13	9	1	2		2	0	0	2	1	0	0	0
10	13	10	11	2	9	1	5		3	0	0	16	0	0	0	0
10	13	10	11	8	11	0	0		2	0	0	6	1	0	0	0
10	14	10	12	16	9	4	30		0	0	0	10	0	0	0	0
10	14	10	12	14	9	0	16		0	0	0	11	0	0	0	0
10	14	10	12	1	9	16	1		0	0	0	7	0	0	0	0
10	14	10	12	7	1	7	37		0	0	0	5	0	0	0	0
10	14	10	12	20	5	1	6		0	0	0	15	0	0	0	0
10	14	10	12	10	4	5	3		0	0	0	10	0	0	0	0
11	14	10	12	11	4	4	43		0	0	0	12	0	0	0	0
12	14	10	12	2	8	4	2		0	0	0	6	0	0	0	0
12	14	11	12	4	1	12	18		0	0	0	3	0	0	0	0
12	14	12	13	1	11	18	27		0	0	0	4	0	0	0	0
12	14	12	13	1	1	4	9		0	0	0	7	0	0	0	0
12	14	12	13	4	2	0	21		0	0	0	21	0	0	0	0
12	14	12	13	7	10	5	0		0	0	0	4	0	0	0	0
12	14	12	13	0	8	15	14		0	0	0	3	0	0	0	0
12	14	12	14	13	12	12	8		0	0	0	6	0	0	0	0
12	14	12	14	0	4	0	28		0	0	0	6	0	0	0	0
12	14	12	14	1	4	11	9		0	0	0	4	0	0	0	0
12	14	12	14	16	18	3	10		0	0	0	6	0	0	0	0
13	14	12	14	9	8	2	11		0	0	0	1	0	0	0	0
13	14	12	14	3	18	4	2		0	0	0	1	0	0	0	0
13	14	12	14	0	18	7	8		0	0	0	3	0	0	0	0
13	14	12	14	15	7	1	30		0	0	0	3	0	0	0	0
13	15	13	14	6	6	12	18		0	0	0	0	0	0	0	0
13	15	13	14	14	0	2	10		0	0	0	0	0	0	0	0
13	15	13	14	3	17	0	20		0	0	0	0	0	0	0	0
13	15	13	14	12	5	3	3		0	0	0	0	0	0	0	0
13	15	13	14	0	8	1	18		0	0	0	0	0	0	0	0
13	15	13	14	0	26	3	2		0	0	0	0	0	0	0	0
13	15	13	14	3	9	17	24		0	0	0	0	0	0	0	0
13	15	13	14	18	6	15	7		0	0	0	0	0	0	0	0
14	15	13	14	1	10	19	19		0	0	0	0	0	0	0	0
14	15	13	14	1	6	7	1		0	0	0	0	0	0	0	0
14	16	13	14	5	7	0	8		0	0	6	0	0	0	0	0
14	16	13	14	1	10	1	12		0	0	7	0	0	0	0	0
14	16	13	15	1	10	21	5		0	0	9	0	0	0	0	0
14	16	13	15	0	20	10	1		0	0	12	0	0	0	0	0
14	16	13	15	3	0	5	13		0	0	6	0	0	0	0	0
14	16	13	15	2	33	17	6		0	0	9	0	0	0	0	0
14	16	14	16	1	11	3	15		0	0	12	0	0	0	0	0
14	16	14	16	0	12	2	0		0	0	22	0	0	0	0	0
14	16	14	16	4	11	7	19		0	0	23	0	0	0	0	0
14	16	14	16	5	12	12	18		0	0	6	0	0	0	0	0
14	16	14	17	2	2	6	7		0	0	8	0	0	0	0	0
14	16	14	17	8	4	6	9		0	0	31	0	0	0	0	0
14	16	14	17	2	10	0	13		0	0	12	0	0	0	0	0
14	16	14	17	6	0	0	25		0	0	18	0	0	0	0	0
14	16	14	18	0	2	11	9		0	0	18	0	0	0	0	0
15	16	15	18	21	5	10	21		0	0	31	0	0	0	0	0
15	16	15	18	9	0	0	6		0	10	16	0	0	0	0	0
15	16	15	18	0	6	6	9		0	13	20	0	0	2	0	0
15	17	15	18	11	5	4	2		0	7	21	0	0	3	0	0
15	17	15	18	3	2	8	4		0	8	30	0	0	10	0	8
15	17	15	19	0	3	0	1		0	32	16	0	0	3	0	2
15	17	15	19	3	5	3	21		1	19	26	0	0	5	0	6
16	17	15	19	0	8	0	8		1	18	15	0	0	3	0	6
16	17	15	19	2	6	0	2		12	28	22	0	0	2	0	3
16	17	16	19	7	9	5	17		10	1	31	0	0	2	4	9
16	17	16	19	1	8	1	5		4	11	20	0	0	11	2	1
17	17	16	19	6	7	1	4		11	11	12	0	0	15	2	2
17	17	16	20	1	10	0	10		6	12	22	0	0	5	16	10
17	17	16	20	1	1	3	2		7	21	22	0	0	3	10	9
17	17	16	20	2	5	0	10		7	12	24	0	0	4	14	5
17	17	16	20	6	4	10	9		12	12	17	0	0	4	21	7
17	17	16	20	9	5	4	9		7	5	21	0	0	4	9	8
17	19	16	21	7	11	1	11		6	3	22	0	0	5	5	7
17	19	16	21	1	2	5	0		9	4	11	0	1	3	5	8
17	19	16	21	4	13	2	9		3	11	6	0	1	2	7	3
17	19	17	21	9	1	3	7		9	12	20	0	4	3	7	4
17	19	17	21	10	5	4	20		1	9	7	0	4	7	8	10
17	19	17	22	9	9	6	6		4	4	4	0	2	5	5	5
17	20	17	22	3	7	4	10		11	4	11	0	6	19	10	17
19	20	17	22	4	7	0	10		6	25	24	0	1	14	2	10
19	20	18	22	2	5	3	2		2	4	11	0	5	12	8	4
19	20	18	22	1	3	12	10		2	7	1	0	3	2	6	2
19	20	18	24	3	3	6	10		4	30	11	0	7	17	6	5
19	20	18	24	8	8	0	1		4	2	3	0	4	19	7	6
19	20	18	24	0	6	11	11		12	16	12	0	7	7	6	2
19	20	18	24	9	7	2	18		6	12	6	0	5	0	17	8
19	20	18	25	0	3	2	3		1	12	6	0	5	7	3	6
19	20	18	25	1	7	4	11		12	20	8	0	8	10	4	5
22	21	18	25	6	0	2	2		8	24	14	0	0	4	5	13
22	21	18	25	8	9	1	17		6	20	11	0	5	10	14	5
22	21	18	25	3	2	14	6		4	9	22	0	8	5	1	8
22	21	19	25	0	8	2	13		14	3	11	0	2	12	4	1
22	21	19	25	9	12	0	1		8	4	18	1	6	4	12	5
22	21	19	26	4	8	5	17		8	13	19	0	3	8	9	16
22	21	19	26	5	6	1	14		11	21	10	0	4	2	1	14
22	21	19	26	3	8	3	12		8	9	0	1	7	20	7	4
22	21	19	26	10	7	3	1		8	24		9	7	2	4	3
23	21	19	27	1	4	10	10		3	13		2	8	3	3	7
23	21	19	27	0	10	15	7		4	13		5	3	7	19	5
23	21	19	27	3	8	6	28		2	18		8	5	20	3	14
23	23	20	28	7	9	0	0		7	1		0	7	7	1	8
23	23	20	28	1	0	1	50		4	7		4	2	7	9	2
23	23	20	28	1	4	13	19		15	22		0	9	1	7	11
23	23	20	28	6	9	9	7		1	13		5	3	7	1	13
23	24	20	29	1	12	5	13		1	14		0	12	5	8	7
24	24	20	31	2	11	11	19		2	5		0	7	10	3	8
24	24	21	33	0	6	3	42		9	8		2	5	13	16	7
25	24	21	33	3	2	2	16		4	14		0	6	13	6	6
25	24	22	47	2	13	6	33		2	14		1	1	8	17	2
25	25	22	47	1	10	3	6		5	10		4	6	7	2	5
25	25	22	54	1	0	5	10		12	6		1	13	13	4	5
26	26	22	54	4	2	9	2		0	15		4	10	10	2	4
26	26	22	0	7	5	0	5			14		0	4	4	13	14
26	26	22	0	2	0	1	0			10		0	9	7	1	3
26	26	22	0	7	7	10	30			15		3	7	3	5	11
27	26	22	0	2	4	9	16			17		2	9	6	3	8
27	26	22	0	6	2	0	1			8		1	5		19	3
27	26	22	0	0	4	3	37			4		0	8		4	4
27	26	22	0	10	6	4	6					3	5		3	4
30	26	22	0	7	9	0	3					0	8		6	7
30	26	23	0	0	9	0	43					3	3		9	5
30	26	23	0	2	11	3	2					2	0		0	3
30	26	23	0	3	9	0	18					0	2		11
35	26	24	0	0	9	0	27					1	6		18
35	26	24	0	4	9	7	9					0	4		4
35	26	25	0	0	1	1	21					6	7		5
35	27	25	0	4	5	1	0					0	11		3
36	27	25	0	5	4	0	14					0	2		3
36	27	25	0	1	4	4	8					3	8		0
36	27	25	0	5	8	0	28					0	10		1
36	27	25	0	2	1	16	9					11	4
38	27	25	0	1	11	7	10					0	4
38	27	25	0	2	1	1	11					2	4
38	27	26	0	8	2	5	2					5	0
38	30	26	0	16	10	4	8					8	3
38	30	26	0	14	8	4	30					0	6
38	30	26	0	1	12	12	18					4
38	30	26	0	7	4	18	10					3
38	30	27	0	20	4	4	20					3
38	30	27	0	10	18	0	3					1
38	30	27	0	11	8	5	18					6
38	30	27	0	2	18	15	2					6
38	30	28	0	4	18	12	24					0
49	30	28	0	1	7	0	7					0
49	30	28	0	1	6	11	19					3
49	30	28	0	4	0	3	0					0
49	31	28	0	7	17	2	13					7
50	31	28	0	0	5	4	2					2
50	31	28	0	13	8	7	28
50	31	28	0	0	26	1	1
50	32	29	0	1	9	12	2
59	32	29	0	16	6	2	10
59	32	29	0	9	10	0	2
59	32	29	0	3	6	3	25
59	32	30	0	0	7	1	1
0	32	30	0	15	10	3	37
0	32	30	0	6	10	17	0
0	32	30	0	14	20	15	2
0	32	31	0	3	0	19	3
0	32	31	0	12	33	7	1
0	32	32	0	0	11	0	26
0	32	32	0	0	12	1	0
0	32	32	0	3	11	21	3
0	32	32	0	18	12	10	9
0	32	33	0	1	2	5	22
1	32	33	0	1		17	0
1	33	35	0	5		3	39
1	33	35	0	1		2	42
1	33	35	0	1		7	34
2	33	35	0	0		12	8
2	33	35	0	3		6	35
2	33	35	0	2		6	33
2	33	37	0	1		0	27
2	33	37	0	0		0	10
2	33	38	0	4		11	15
2	33	38	0	5		10	27
2	33	44	0	2		0	18
2	33	44	0	8		6	12
2	34	45	0	2		4	8
2	34	45	0	6		8	1
2	34	47	0	0			13
2	34	47	0	21			5
2	34	49	0	9			11
2	34	49	1	0			9
3	34	52	1	11			16
3	34	52	1	3			13
3	35	53	1	0			29
3	35	53	1	3			4
4	35	56	1	0			7
4	35	56	1	2			0
4	45	57	1	7			9
4	45	57	1	1			10
4	45	58	2	6			4
4	45	58	2	1			11
4	45	59	2	1			10
5	45	59	2				6
5	45	63	2				5
5	45	63	2				3
5	47	66	2				4
5	47	66	2				5
5	47	0	3				0
5	47	0	3				13
5	48	0	3				2
5	48	0	3				28
5	48	1	3				1
5	48	1	3				2
5	51	1	3				10
6	51	1	3				2
6	51	1	3				25
6	51	2	3				1
6	54	2	3				37
6	54	2	3				0
6	54	2	3				2
6	54	3	4				3
6	57	3	4				1
7	57	3	4				26
7	57	4	4				0
7	57	4	4				3
7	60	4	4				9
7	60	4	4				22
7	60	4	4				0
7	60	4	4				39
7	67	4	4		14		42
7	67	4	4		5		34
7	67	5	5		8		8
7	67	5	5		19		35
7	98	5	5		21		33
8	98	5	5		28		27
8	98	5	5		18		10
8	98	5	5		4		15
8	0	5	5		12		27
8	0	5	5		12		18
8	0	5	5		8		12
8	0	5	5		31		8
8	0	6	5		3		1
8	0	6	5		30		13
8	1	6	5		18		5
8	1	7	6		16		11
8	1	7	6		6		9
9	1	7	6		3		16
9	1	7	6		9		13
9	2	7	6		13		29
10	2	7	6		12		4
10	2	7	6		2	3	7
10	2	7	6		19	6	0
10	2	7	6		14	5	9
10	3	7	6		8	19	10
10	3	7	6		34	16	4
10	3	7	6		20	18	11
10	3	7	6		3	10	10
10	4	8	6		17	24	6
10	4	8	6		18	6	5
10	4	8	6		24	19	3
10	5	8	6		0	14	4
11	5	8	6		3	27	5
11	5	8	6		21	17	0
11	5	8	6		29	7	13
11	5	8	6		11	23	2
11	5	8	6		19	4	28
11	5	8	7		11	11	1
11	5	8	7		9	14	2
11	5	9	7	2	23	26	10
11	5	9	7	11	19	22	2
11	5	9	7	11	27	24	25
11	5	9	7	12	19	18	1
12	6	9	7	6	13	17	37
12	6	9	7	9	3	14	0
12	6	9	7	4	12	8	2
12	6	9	7	9	5	13	3
12	6	9	7	16	8	15	1
12	6	9	7	34	11	26	26
12	6	9	7	15	6	13	0
12	6	9	7	13	16	8	3
13	6	9	8	17	1	21	9
13	6	9	8	10	19	19	22
13	6	9	8	22	6	14	0
13	7	9	8	25	7	11	39
13	7	9	8	10	11	26	42
13	7	9	8	22	14	21	34
13	7	9	8	10	3	28	8
13	8	10	8	18	2	20	35
13	8	10	8	16	0	13	33
13	8	10	9	36	17	5	27
14	8	10	9	21	0	15	10
14	8	10	9	8	4	17	15
14	8	11	9	11	10	20	27
14	8	11	9	5	1	13	18
14	8	11	9	14	1	14	12
14	8	11	9	13	3	11	8
14	8	11	9	25	5	32	1
14	8	11	9	14	8	9	13
15	8	11	9	3	1	12	5
15	9	11	9	13	3	12	11
15	9	11	9	16	13	15	9
15	9	11	9	21	27	21	16
15	9	11	9	17	0	18	13
15	9	12	9	14	17	5	29
15	9	12	10	6	5	5	4
15	9	12	10	11	18	16	7
16	9	12	10	3	15	17	0
16	9	13	10	28	12	19	9
16	9	13	10	4	9	17	10
16	9	13	10	10	3	15	4
16	9	13	10	9	4	9	11
16	9	13	11	15	21	7	10
16	9	13	11	10	8	8	6
16	10	13	11	28	0	17	5
17	10	13	11	16	11	28	3
17	10	14	11	7	13	8	4
17	10	14	11	22	2	5	5
17	10	14	11	5	20	4	0
17	10	14	11	21	7	6	7
17	10	14	12	9	13	11	2
17	10	14	12	17	9	3	25
17	10	14	12	5	1	1	2
17	10	14	12	17	0	1	2
17	10	14	12	12	17	3	8
17	10	14	12	7	12	25	4
17	10	15	12	9	15	4	20
18	10	15	12	11	11	0	1
18	10	15	12	3	9	13	15
18	10	15	12	10	2	1	1
18	10	15	12	27	13	11	2
18	10	15	12	11	0	9	2
18	10	15	12	14	9	8	1
18	10	15	12	15	2	12	24
18	11	15	12	13	2	7	0
18	11	16	12	1	5	3	3
19	11	16	12	1	24	10	11
19	11	16	12	1	7	1	12
19	11	16	12	1	0	2	0
19	11	16	12	2	4	0	16
19	11	17	13	7	14	23	13
20	12	17	13	11	7	12	15
20	12	17	13	2	2	1	1
21	12	17	13	8	2	0	8
21	12	17	13	9	3	16	17
21	12	17	13	11	1	8	7
21	12	17	13	0	0	11	5
21	12	17	13	7	6	2	13
21	12	17	14	11	1	4	10
21	12	17	14	3	4	13	10
21	13	17	14	11	7	14	8
21	13	17	14	0	1	11	10
22	13	17	14	2	1	2	1
22	13	17	14	5	3	1	9
22	13	17	14	8	4	3	5
22	13	18	15	1	9	8	8
22	13	18	15	5	1	5	10
22	13	18	15	9	3	12	9
23	13	18	15	0	14	10	5
23	13	18	15	0	5	2	13
23	13	18	15	0	0	11	5
23	13	18	15	0	5	2	10
23	14	18	16	11	4	1	0
23	14	18	16	9	10	4	7
24	14	18	16	3	10	10	7
24	14	18	16	0	10	3	4
24	14	18	16	1	7	20	6
25	14	18	16	13	3	8	7
25	14	19	17	3	5	7	6
25	14	19	17	7	16	7	5
27	14	19	17	2	7	12	2
27	14	19	17	1	0	2	3
28	14	20	17	0	10	1	4
29	14	20	17	0	7	2	0
30	14	20	18	5	3	8	13
37	15	20	18	2	1	0	2
41	15	20	18	13	7	0	28
41	15	21	18	1	9	10	1
44	15	21	19	2	8	2	2
44	15	21	19	6	1	2	10
44	15	21	19	8	1	5	2
46	15	21	19	4	7	4	25
46	15	22	19	2	4	5	1
0	15	22	19	3	9	4	37
0	16	22	19	1	10	3	0
0	16	22	19	6	9	2	2
0	16	22	20	1	2	2	3
0	16	22	20	13	5	4	1
0	16	23	20	4	0	21	26
0	16	23	20	8	8	3	0
0	16	24	20	2	2	1	3
0	16	24	20	1	2	10	9
0	16	24	20	4	4	1	22
0	16	24	21	16	10	3	0
0	16	24	21	1	5	6	39
0	16	25	21	3	0	8	42
0	16	25	22	7	3	10	34
0	16	25	22	4	9	8	8
0	16	25	23	1	6	3	35
0	16	25	23	1	2	4	33
0	17	25	23	2	2	2	27
0	17	26	24	1	3	3	10
0	17	26	24	2	2	1	15
0	17	26	24	1	0	11	27
0	17	26	24	1	17	1	18
0	18	26	25	3	0	1	12
0	18	27	25	5	4	0	8
0	18	27	25	7	10	4	1
0	18	27	25	2	1	9	13
0	18	28	26	7	1	12	5
0	18	28	26	9	3	2	11
0	18	28	26	5	5	3	9
0	18	30	28	0	8	12	16
0	18	30	28	7	1	11	13
0	19	30	28	8	3	11	29
0	19	30	28	3	13	2	4
0	19	30	28	8	27	2	7
0	19	30	28	0	0	3	0
0	19	31	29	3	17	5	9
0	19	33	29	4	5	5	10
0	20	34	31	10	18	4	4
0	20	34	31	1	15	7	11
0	20	48	37	5	12	3	10
0	20	48	37	7	9	13	6
0	20	52	49	0	3	2	5
0	20	52	49	0	4	1	3
0	21	54	0	0	21	3	4
0	21	54	0	0	8	9	5
0	21	62	0	5	0	3
0	21	62	0	10	11	8
0	21	85	0	3	13	1
0	21	85	0	0	2	4
0	21	0	0	1	20	3
0	21	0	0	6	7	12
0	21	0	0	4	13	2
0	21	0	0	7	9	1
0	22	0	0	3	1	2
0	22	0	0	1	0	4
	22	0	0	0	17	0
	22	0	0	0	12	1
	23	0	0	6	15	17
	23	0	0	3	11	28
	23	0	0	4	9	8
	23	0	0	1	2	5
	24	0	0	2	13	4
	24	0	0	5	0	6
	24	0	0	5	9	11
	25	0	0	4	2	3
	25	0	0	2	2	1
	27	0	0	4	5	1
	27	0	0	2	24	3
	28	0	0	5	7	25
	28	0	0	1	0	4
	28	0	0	6	4	0
	28	0	0	5	14	13
	29	0	0	8	7	1
	29	0	0	1	2	11
	29	0	0	1	2	9
	29	0	0	4		8
	29	0	0	7		12
	29	0	0	1		7
	30	0	0	3		3
	30	0	0	8		10
	30	0	0	2		1
	30	0	0	1		2
	30	0	0	1		0
	30	0	0	2		23
	33	0	0	1		12
	33	0	0	1		1
	33	0	0	1		0
	33	0	0	1		16
	34	0	0	2		8
	34	0	0	7		11
	35	0	0	11		2
	35	0	0	2		4
	37	0	0	8		13
	37	0	0	9		14
	37	0	0	11		11
	38	0	0	0		2
	38	0	0	7		1
	38	0	0	11		3
	38	0	0	3		8
	41	0	0	11		5
	41	0	0	0		12
	45	0	0	2		10
	45	0	0	5		2
	53	0	0	8		11
	53	0	0	1		2
	59			5		1
	59			9		4
	60			0		10
	60			0		3
	65			0		20
	65			0		8
	0			11		7
	0			9		7
	0			3		12
	0			0		2
	0			1		1
	0			13		2
	0			3		8
	0			7		0
	0			2		0
	0			1
	0			0
	0			0
	0			5
	0			2
	0			13
	0			1
	0			2
	0			6
	0			8
	0			4
	0			2
	0			3
	0			1
	0			6
	0			1
	0			13
	0			4
	0			8
	0			2
	0			1
	0			4
	0			16
	0			1
	0			3
	0			7
	0			4
	0			1
	0			1
	0			2
	0
	0
	0
	0
	0
	0
	0
	0
	0
	0
	0
	0
	0
	0
	0
	0
	0
	0
	0
	0
	0
	0
	0
	0
	0

## Sheet: Fig. A,B-statistics
	Fig 5A, B: Representative confocal IF images
	Fig 5A, B: Statistics
	JEKO-1			PLA: CC1-SYK			PLA: CC1-SYK
	Table Analyzed	CC1-Syk,Shp1		Table Analyzed	CC1-Syk,Shp1		Table Analyzed	CC1-Syk,Shp1		Table Analyzed	CC1-Syk,Shp1
	Column E	CC1-SHP1: 0'		Column F	CC1-SHP1: 5'		Column G	CC1-SHP1: 15'		Column H	CC1-SHP1: 30'
	vs.	vs.		vs.	vs.		vs.	vs.		vs.	vs.
	Column A	CC1-SYK: 0'		Column B	CC1-SYK: 5'		Column C	CC1-SYK: 15'		Column D	CC1-SYK: 30'
	Mann Whitney test			Mann Whitney test			Mann Whitney test			Mann Whitney test
	P value	<0.0001		P value	<0.0001		P value	<0.0001		P value	<0.0001
	Exact or approximate P value?	Approximate		Exact or approximate P value?	Approximate		Exact or approximate P value?	Approximate		Exact or approximate P value?	Approximate
	P value summary	****		P value summary	****		P value summary	****		P value summary	****
	Significantly different (P < 0.05)?	Yes		Significantly different (P < 0.05)?	Yes		Significantly different (P < 0.05)?	Yes		Significantly different (P < 0.05)?	Yes
	One- or two-tailed P value?	Two-tailed		One- or two-tailed P value?	Two-tailed		One- or two-tailed P value?	Two-tailed		One- or two-tailed P value?	Two-tailed
	Sum of ranks in column A,E	334402 , 234310		Sum of ranks in column B,F	430499 , 204002		Sum of ranks in column C,G	407997 , 256131		Sum of ranks in column D,H	301980 , 289348
	Mann-Whitney U	100924		Mann-Whitney U	99806		Mann-Whitney U	103503		Mann-Whitney U	121680
	Difference between medians			Difference between medians			Difference between medians			Difference between medians
	Median of column A	10.00, n=550		Median of column B	14.00, n=670		Median of column C	12.00, n=600		Median of column D	7.000, n=600
	Median of column E	5.000, n=516		Median of column F	8.000, n=456		Median of column G	5.000, n=552		Median of column H	10.00, n=487
	Difference: Actual	-5		Difference: Actual	-6		Difference: Actual	-7		Difference: Actual	3
	Difference: Hodges-Lehmann	-4		Difference: Hodges-Lehmann	-6		Difference: Hodges-Lehmann	-6		Difference: Hodges-Lehmann	2
	MINO
	Table Analyzed	MINO CC1-SYK,SHP1		Table Analyzed	MINO CC1-SYK,SHP1		Table Analyzed	MINO CC1-SYK,SHP1		Table Analyzed	MINO CC1-SYK,SHP1
	Column E	CC1-SHP1: 0'		Column F	CC1-SHP1: 5'		Column G	CC1-SHP1: 15'		Column H	CC1-SHP1: 30'
	vs.	vs.		vs.	vs.		vs.	vs.		vs.	vs.
	Column A	CC1-SYK: 0'		Column B	CC1-SYK: 5'		Column C	CC1-SYK: 15'		Column D	CC1-SYK: 30'
	Mann Whitney test			Mann Whitney test			Mann Whitney test			Mann Whitney test
	P value	0.5635		P value	0.026		P value	0.0003		P value	0.0014
	Exact or approximate P value?	Approximate		Exact or approximate P value?	Approximate		Exact or approximate P value?	Approximate		Exact or approximate P value?	Approximate
	P value summary	ns		P value summary	*		P value summary	***		P value summary	**
	Significantly different (P < 0.05)?	No		Significantly different (P < 0.05)?	Yes		Significantly different (P < 0.05)?	Yes		Significantly different (P < 0.05)?	Yes
	One- or two-tailed P value?	Two-tailed		One- or two-tailed P value?	Two-tailed		One- or two-tailed P value?	Two-tailed		One- or two-tailed P value?	Two-tailed
	Sum of ranks in column A,E	57548 , 61769		Sum of ranks in column B,F	59604 , 52972		Sum of ranks in column C,G	55319 , 53492		Sum of ranks in column D,H	63645 , 66660
	Mann-Whitney U	28873		Mann-Whitney U	25006		Mann-Whitney U	22117		Mann-Whitney U	27599
	Difference between medians			Difference between medians			Difference between medians			Difference between medians
	Median of column A	0.000, n=232		Median of column B	0.000, n=238		Median of column C	0.000, n=216		Median of column D	0.000, n=268
	Median of column E	0.000, n=256		Median of column F	0.000, n=236		Median of column G	0.000, n=250		Median of column H	0.5000, n=242
	Difference: Actual	0		Difference: Actual	0		Difference: Actual	0		Difference: Actual	0.5
	Difference: Hodges-Lehmann	0		Difference: Hodges-Lehmann	0		Difference: Hodges-Lehmann	0		Difference: Hodges-Lehmann	0

## Sheet: Fig. 5C
	Fig 5C: Densitometry
	IP#1	0 MIN	5 MIN	15 MIN	30 MIN		IP#2	0 MIN	5 MIN	15 MIN	30 MIN		IP#3	0 MIN	5 MIN	15 MIN	30 MIN
	CC1	78.468	98.37	76.581	93.142		CC1	139.945	168.352	158.868	163.563		CC1	130.349	105.691	115.866	124.004
	PHOSPHO-SYK	30.594	87.254	36.176	34.322		PHOSPHO-SYK	51.864	167.274	141.332	102.722		PHOSPHO-SYK	102.231	123.228	160.364	111.101
	SYK	115.123	127.453	63.193	45.213		SYK	116.185	172.858	72.793	70.483		SYK	132.824	114.264	153.116	108.405
	SHP-1	42.902	36.882	22.633	32.878		SHP-1	23.666	82.199	72.125	84.433		SHP-1	59.623	18.29	89.803	101.973
	Relative quantification wrt CC1 for IP	(Net Protein X/Net loading control)
	IP#1	0 MIN	5 MIN	15 MIN	30 MIN		IP#2	0 MIN	5 MIN	15 MIN	30 MIN		IP#3	0 MIN	5 MIN	15 MIN	30 MIN
	CC1	1	1	1	1		CC1	1	1	1	1		CC1	1	1	1	1
	PHOSPHO-SYK	0.389891	0.886998	0.472389	0.368491		PHOSPHO-SYK	0.370603	0.993597	0.889619	0.628027		PHOSPHO-SYK	0.784287	1.16593	1.38405	0.895947
	SYK	1.46713	1.29565	0.825179	0.48542		SYK	0.830219	1.02677	0.458198	0.430923		SYK	1.01899	1.08111	1.32149	0.874206
	SHP-1	0.546745	0.374931	0.295543	0.352988		SHP-1	0.169109	0.488257	0.453993	0.516211		SHP-1	0.45741	0.173052	0.775059	0.822336
	Relative quantification wrt CC1 for IP	(Net Protein X/Net loading control)
	CC1	0 MIN	5 MIN	15 MIN	30 MIN
	IP1	1	1	1	1
	IP2	1	1	1	1
	IP3	1	1	1	1
	Relative quantification wrt CC1 for IP
	Phospho-Syk	0 MIN	5 MIN	15 MIN	30 MIN
	IP1	0.389891	0.886998	0.472389	0.368491
	IP2	0.370603	0.993597	0.889619	0.628027
	IP3	0.784287	1.16593	1.38405	0.895947
	Avg	0.514927	1.01551	0.915352	0.630822
	SD	0.233472	0.140749	0.456374	0.263739
	Relative quantification wrt CC1 for IP
	Syk	0 MIN	5 MIN	15 MIN	30 MIN
	IP1	1.13259	0.995745	0.794545	0.927283
	IP2	0.830219	1.02677	0.458198	0.430923
	IP3	1.01899	1.08111	1.32149	0.874206
	Avg	0.993931	1.03454	0.858078	0.744137
	SD	0.152733	0.0432125	0.43514	0.272547
	Relative quantification wrt CC1 for IP
	SHP-1	0 MIN	5 MIN	15 MIN	30 MIN
	IP1	0.546745	0.374931	0.295543	0.352988
	IP2	0.169109	0.488257	0.453993	0.516211
	IP3	0.45741	0.173052	0.775059	0.822336
	Avg	0.391088	0.345413	0.508199	0.563845
	SD	0.197361	0.159662	0.24431	0.238272
	Relative quantification wrt CC1 for IP	Avg
		0'	5'	15'	30'
	CC1	1	1	1	1
	p-SYK	0.514927	1.01551	0.915352	0.630822
	SYK	0.993931	1.03454	0.858078	0.744137
	SHP-1	0.391088	0.345413	0.508199	0.563845
	Relative quantification wrt CC1 for IP	SD
		0 MIN	5 MIN	15 MIN	30 MIN
	CC1	0	0	0	0
	PHOSPHO-SYK	0.233472	0.140749	0.456374	0.263739
	SYK	0.152733	0.0432125	0.43514	0.272547
	SHP-1	0.197361	0.159662	0.24431	0.238272
	Fig 5C: Statistics
	Table Analyzed	JEKO-1 IP:CC1
	Column A	SYK
	vs.	vs.
	Column B	SHP-1
	Nested t test
	P value	<0.0001
	P value summary	****
	Significantly different (P < 0.05)?	Yes
	One- or two-tailed P value?	Two-tailed
	t, df	t=4.798, df=22
	F, DFn, Dfd	23.02, 1, 22
	How big is the difference?
	Mean of column A	0.9077
	Mean of column B	0.4521
	Difference between means (A - B) ± SEM	0.4555 ± 0.09494
	95% confidence interval	0.2586 to 0.6524
	Random effects	SD	Variance
	Variation within subcolumns	0.2326	0.05409
	Variation among subcolumn means	0	0
	Do the subcolumns differ (within each column)?
	Chi-square, df
	P value
	P value summary
	Is there significant difference between subcolumns (P < 0.05)?	No
	Data analyzed
	Number of treatments (columns)	2
	Number of subjects (subcolumns)	8
	Total number of values	24

## Sheet: Fig. 5D
	Fig 5D: Densitometry
	IP1	0 MIN	5 MIN	15 MIN	30 MIN		IP2	0 MIN	5 MIN	15 MIN	30 MIN		IP3	0 MIN	5 MIN	15 MIN	30 MIN
	CC1	152.779	152.792	143.634	158.011		CC1	136.348	135.21	129.81	128.866		CC1	139.576	138.449	139.165	134.404
	PHOSPHO-SYK	75.803	131.27	70.102	84.667		PHOSPHO-SYK	79.617	201.389	175.154	62.141		PHOSPHO-SYK	11.799	117.954	150.023	98.731
	SYK	159.035	160.884	112.258	75.931		SYK	132.148	167.053	121.388	66.733		SYK	133.622	161.305	154.142	95.313
	SHP-1	61.747	58.55	55.498	40.984		SHP-1	43.116	47.088	77.242	89.615		SHP-1	29.817	28.484	64.881	41.846
	Relative quantification wrt CC1 for IP	(Net Protein X/Net loading control)					Relative quantification wrt CC1 for IP	(Net Protein X/Net loading control)					Relative quantification wrt CC1 for IP	(Net Protein X/Net loading control)
		0 MIN	5 MIN	15 MIN	30 MIN			0 MIN	5 MIN	15 MIN	30 MIN			0 MIN	5 MIN	15 MIN	30 MIN
	CC1	1	1	1	1		CC1	1	1	1	1		CC1	1	1	1	1
	PHOSPHO-SYK	0.496161	0.859142	0.48806	0.53583		PHOSPHO-SYK	0.583925	1.48945	1.34931	0.482214		PHOSPHO-SYK	0.0845346	0.851967	1.07802	0.734584
	SYK	1.04095	1.05296	0.781556	0.480542		SYK	0.969196	1.23551	0.935121	0.517848		SYK	0.957342	1.16509	1.10762	0.709153
	SHP-1	0.404159	0.383201	0.386385	0.259374		SHP-1	0.31622	0.348258	0.595039	0.695412		SHP-1	0.213626	0.205736	0.466216	0.311345
	Relative quantification wrt CC1 for IP	(Net Protein X/Net loading control)
	CC1	0 MIN	5 MIN	15 MIN	30 MIN
	IP1	1	1	1	1
	IP2	1	1	1	1
	IP3	1	1	1	1
	Relative quantification wrt CC1 for IP
	Phospho-Syk	0 MIN	5 MIN	15 MIN	30 MIN
	IP1	0.496161	0.859142	0.48806	0.53583
	IP2	0.583925	1.48945	1.34931	0.482214
	IP3	0.0845346	0.851967	1.07802	0.734584
	Avg	0.388207	1.06685	0.971798	0.584209
	SD	0.266624	0.365999	0.440342	0.132959
	Relative quantification wrt CC1 for IP
	Syk	0 MIN	5 MIN	15 MIN	30 MIN
	IP1	1.04095	1.05296	0.781556	0.480542
	IP2	0.969196	1.23551	0.935121	0.517848
	IP3	0.957342	1.16509	1.10762	0.709153
	Avg	0.989162	1.15118	0.941432	0.569181
	SD	0.0452378	0.0920639	0.163124	0.122646
	Relative quantification wrt CC1 for IP
	SHP-1	0 MIN	5 MIN	15 MIN	30 MIN
	IP1	0.404159	0.383201	0.386385	0.259374
	IP2	0.31622	0.348258	0.595039	0.695412
	IP3	0.213626	0.205736	0.466216	0.311345
	Avg	0.311335	0.312398	0.482547	0.422044
	SD	0.0953606	0.0940098	0.105281	0.238166
	Relative quantification wrt CC1 for IP	Avg
		0'	5'	15'	30'
	CC1	1	1	1	1
	p-SYK	0.388207	1.06685	0.971798	0.584209
	SYK	0.989162	1.15118	0.941432	0.569181
	SHP-1	0.311335	0.312398	0.482547	0.422044
	Relative quantification wrt CC1 for IP	SD
		0 MIN	5 MIN	15 MIN	30 MIN
	CC1	0	0	0	0
	PHOSPHO-SYK	0.266624	0.365999	0.440342	0.132959
	SYK	0.0452378	0.0920639	0.163124	0.122646
	SHP-1	0.0953606	0.0940098	0.105281	0.238166
	Fig 5D: Statistics
	Table Analyzed	MINO IP:CC1
	Column A	SYK
	vs.	vs.
	Column B	SHP-1
	Nested t test
	P value	0.0065
	P value summary	**
	Significantly different (P < 0.05)?	Yes
	One- or two-tailed P value?	Two-tailed
	t, df	t=4.079, df=6
	F, DFn, Dfd	16.64, 1, 6
	How big is the difference?
	Mean of column A	0.9127
	Mean of column B	0.3821
	Difference between means (A - B) ± SEM	0.5307 ± 0.1301
	95% confidence interval	0.2123 to 0.8490
	Random effects	SD	Variance
	Variation within subcolumns	0.1313	0.01724
	Variation among subcolumn means	0.1676	0.0281
	Do the subcolumns differ (within each column)?
	Chi-square, df	8.005, 1
	P value	0.0047
	P value summary	**
	Is there significant difference between subcolumns (P < 0.05)?	Yes
	Data analyzed
	Number of treatments (columns)	2
	Number of subjects (subcolumns)	8
	Total number of values	24
