# Supplementary material for: CEACAM1 Orchestrates Lipid Raft Dynamics and B-cell Receptor Signaling in Mantle Cell Lymphoma
Source: Research Square preprint supplement (doi:10.21203/rs.3.rs-5321424/v1), 2024-11-01
Supplement: Supplementary file 7 [file 4fede77e8d30dd17db9feef6.xlsx]

## Sheet: Sheet1
Extended data Fig. 5A: Immunoblots
Extended data Fig. 5C: Statistics
	shCON		shFLNA
	Mean	SD	Mean	SD
Day 2	100	0	100	0
Day 4	84.8901	4.12213	63.7668	1.50725
Day 6	75.9956	5.86016	31.814	4.06593
Day 8	60.4727	4.16045	22.92	6.49406
			1-tailed, paired t test
		p=	0.0397919
