# Supplementary material for: CEACAM1 Orchestrates Lipid Raft Dynamics and B-cell Receptor Signaling in Mantle Cell Lymphoma
Source: Research Square preprint supplement (doi:10.21203/rs.3.rs-5321424/v1), 2024-11-01
Supplement: Supplementary file 8 [file 523e407a6bde719ce5f6c780.xlsx]

## Sheet: Fig 4C-Signal intensity
Signal intensity/cell
FLNA					LYN					Co-localized
gNTC	gNTC+aIgM	gCC1	gCC1+aIgM		gNTC	gNTC+aIgM	gCC1	gCC1+aIgM		gNTC	gNTC+aIgM	gCC1	gCC1+aIgM
62961	1480000	73033	349876		423296	561116	486429	874889		54164	535549	42909	261116
8568	967869	176583	291426		143771	759006	203046	303094		7293	606704	62457	120263
280846	200564	71263	261628		406503	271088	208211	809484		149839	94281	28105	189177
11952	399011	95888	130526		161747	292425	357253	520542		8453	172002	42030	70529
192655	1660000	124692	298994		378343	383039	259011	528114		132482	409557	55187	159604
468892	363981	58365	181520		388041	448449	435778	463010		199905	190585	44062	115125
18248	334210	23461	419365		359071	469317	203062	598230		20647	208205	8817	184146
10639	706723	221881	251354		163990	563987	614413	293820		7743	435766	130397	66810
84749	510191	53430	634432		166936	611600	228730	607742		28858	308220	14496	296590
373695	827678	158010	196801		484327	1240000	453152	230660		215879	621980	66330	73669
12727	654069	302689	91312		908146	523088	267567	282657		25544	361640	106602	43988
111707	435748	161068	96468		260698	576094	284398	252216		63914	312034	90922	42812
128088	316623	92409	369856		354919	508729	308447	536467		80800	177534	34245	144585
169323	223932	69751	154593		321729	522040	231264	628123		103551	178647	34962	105605
20695	452004	100063	121519		351038	351048	462852	352054		24025	211857	60098	47001
161592	1310000	25621	438127		839377	1540000	140766	278881		137647	970448	12920	135249
196653	1250000	262031	26380		294608	1020000	760287	55934		128819	713496	182372	5890
403184	97727	157592	474371		1050000	211420	263105	1240000		396879	52664	88202	294683
151	296974	44559	283842		0	575632	203239	383790		0	229642	20144	104648
23647	348533	88467	83247		344890	454506	46361	178360		21196	181837	20325	24193
4146	612375	220376	332895		363600	1130000	415727	729583		5779	322321	111343	226953
77752	265866	281243	189362		427843	881538	489467	416569		62602	206706	140807	97513
392265	202663	240773	200464		395840	376833	374310	223384		253593	144168	100032	60127
76484	442747	363719	116574		281989	918651	529549	106495		51075	336408	163355	38926
92906	626540	258935	127186		385381	352251	291355	349347		77841	275027	99038	76277
164904	226013	44404	178192		832776	416271	297781	254018		175698	124263	19428	60061
84477	428026	100106	387958		248718	981356	287649	180548		58401	338292	49565	117496
198473	647664	291377	79061		552410	392576	561672	334454		160712	297292	154994	46828
57070	302510	40426	79301		314343	1210000	465579	401991		35641	251269	27827	45982
248681	341092	65884	477720		753954	361909	251928	502211		210972	150847	21345	261012
350468	358787	240321	157867		415040	990454	351659	349742		168242	299877	136313	103120
159535	123312	1743	279862		565147	363939	4331	467605		135783	109401	208	179563
233724	259670	46851	272586		476363	268630	115309	522587		150069	143539	18936	145462
91056	338489	190994	144757		288588	1180000	479331	319276		82884	281589	106993	64619
191412	224439	237377	423181		563026	657465	844321	796075		182910	153736	136314	324500
204430	876275	65182	372615		377068	802426	148488	919201		112822	508103	19798	251973
112977	1430000	148682	453362		578688	472961	515542	494532		104240	508371	116599	223231
166602	1770000	137740	210910		492697	987089	401044	234330		137993	905829	68174	95415
380846	618653	11293	117994		528195	371547	25523	185222		259297	253976	506	61879
485724	1300000	268625	110661		645791	813278	518194	186856		380696	662925	129282	40403
321197	667332	29170	144275		666243	519381	84480	291524		209443	319826	9228	81238
203612	473415	252935	6742		432458	949852	343702	86022		177475	345654	102609	2331
520934	298566	66510	78516		822132	250206	439939	112011		270326	134427	36655	22785
382174	126926	81020	365660		855533	350211	308968	534403		306878	85190	40744	222312
272674	310952	135237	275839		657393	175450	185235	385198		204389	88425	42168	131169
275039	544458	166847	188959		602476	502065	491593	251231		210781	207263	84292	108090
137592	575061	98289	232077		253103	288859	526837	376631		61457	250943	82983	88917
258112	1160000	271673	18972		452830	632123	395859	166501		182778	471474	147761	7759
38852	264722	29538	374086		238294	494672	234201	290011		32003	176475	16913	143851
241586	430215	345103	317869		608342	546164	574671	464067		202074	278787	182965	149625
212488	308348	213314	154480		515569	560380	270866	439777		161548	187447	79135	80075
34645	264067	247440	276388		48694	599006	479922	753951		7611	208703	141843	214458
199137	365239	52861	333035		321416	151191	315886	366600		131245	95749	31633	157915
100383	608380	64818	191333		352048	567799	283065	274758		67728	282087	32297	88697
30426	878418	89479	323239		300728	1030000	305053	418758		32083	635353	58499	180822
34647	257428	77	636850		190467	572620	741	842651		23344	202876	0	368428
151164	531292	68999	194356		498331	745293	184462	135741		91294	295319	30616	46869
175251	393062	145480	178046		412110	690140	411870	133730		136839	307223	47894	47685
126608	435428	140505	79760		350893	807393	892346	379489		80144	353550	123271	48163
250682	369526	197666	243224		603851	365697	384853	307607		211254	175656	104554	110148
78252	94981	129727	357590		345364	287712	338987	382914		86665	45822	87008	145461
45581	1170000	134404	144066		138053	1770000	456999	186595		22211	502610	88872	82688
41021	907080	108539	297495		156776	832890	372402	636697		27116	491496	44892	133920
37940	247965	46664	675124		283434	396347	285077	1020000		36105	131275	23733	427478
270852	138133	134125	487818		843773	491023	794521	639809		240004	76267	83120	189606
99328	84981	61108	756601		446664	592380	184157	621157		76232	61730	20848	301816
175935	403385	65614	295448		451818	665487	217982	866418		110035	290504	31752	150882
9216	1190000	251514	262137		314421	821946	385770	373310		12023	631595	112397	141115
34171	789864	138629	622677		622485	385905	363531	579492		42616	330849	72681	354045
17874	1980000	342884	352405		283522	556860	785343	1020000		20286	606348	175376	202871
9298	535654	184522	411552		304122	444941	455553	817003		9871	253850	102510	229157
46168	55594	152301	509220		186855	453572	579163	698117		32834	46970	102190	233815
0	470322	119658	134893		0	411413	295012	321658		0	195432	80636	91327
460543	274186	53771	133660		627521	217611	245429	332454		313599	112732	28997	66737
29570	361274	48482	689423		205704	547466	174126	178911		15051	259611	27303	174149
36939	441811	140806	97793		190527	1270000	357395	255998		19538	383888	93065	42762
127134	1300000	96143	160260		480766	883776	269349	245415		90141	742674	42906	93469
111757	297600	114019	771489		318995	435600	455813	357169		40696	163647	70170	235029
232980	548369	103037	479676		499615	695389	744439	324170		93665	331036	98682	168609
242361	999504	258135	149865		442364	652922	335639	178949		143663	438936	120630	54271
16665	1310000	231746	106507		191680	1010000	58555	260499		12208	602617	33585	58518
86704	981641	111091	601288		198144	885393	315840	452712		36375	541531	59966	271691
35011	260810	36288	463919		646978	441133	268821	487020		35302	174701	17013	187147
120734	364305	274090	230024		385209	689192	574376	326373		56741	254461	163445	121761
66949	532518	227683	246513		255998	445493	782987	316515		54406	230999	173470	100760
286325	293612	157931	157910		535356	594446	406869	119563		193273	192661	80972	59142
104144	141930	94374	332813		184124	142006	326943	725000		37987	37144	48781	192763
210936	640768	143020	182245		329665	540088	490026	159497		94065	316804	108282	62774
35844	349573	53072	683252		220504	488652	113980	472714		20665	249688	24186	238000
149560	418994	73654	279123		772784	528557	135640	560963		121049	283810	36996	130318
170622	527967	93758	317891		272704	788745	262913	816692		103176	375997	43615	233963
60332	254420	255937	52512		149363	278329	604780	199924		23085	107032	157625	23783
70404	218576	88605	346288		6356	667540	169311	443722		4880	164695	27067	160563
201135	216382	323065	233115		703657	627302	403767	210016		174497	88167	152166	69314
194795	729739	140923	199440		476181	814373	248796	463626		157695	368240	50384	80476
17633	180212	61573	53887		152970	451544	365559	170124		10074	80642	37704	19699
118712	431493	135424	788402		377610	429937	291372	491146		68920	225512	46503	325069
154990	911548	119701	153437		682103	1070000	580067	203340		74645	676431	78809	48775
60497	239863	103562	98125		80546	523244	457783	132745		29703	96956	53610	46694
279977	988027	119364	112130		283946	452490	430438	168113		130621	400518	68084	52310
73253	608971	172112	131789		137934	547453	682750	150240		29799	294084	148083	53802
225517	352417	84928	202204		354934	648227	313955	114272		99848	169714	47124	72121
68140	356816	168267	224551		172513	647770	352020	262137		31938	207709	75330	93292
302218	89011	254070	60835		469099	416671	564436	72709		209687	63220	130811	14499
265622	313641	215132	281892		529285	530926	377237	644042		145202	171497	99635	121216
215423	596088	39012	138439		382936	718138	143261	217890		183621	332061	21131	35531
105930	682735	216453	407188		232055	475662	283916	1040000		65387	285482	71006	219866
120057	364097	71763	261499		544927	876651	410385	340018		108246	239055	30031	135940
48723	653669	168132	208280		316119	713940	381933	184633		38747	420111	63828	32189
56866	194846	65633	221121		346253	571056	287656	272996		44199	141337	37966	91160
150291	280707	199556	132963		481288	851482	569176	206861		116742	236249	95520	69322
274048	827605	148344	36062		689352	802891	288916	48436		283150	537960	77846	22667
277160	365204	106624	215614		1520000	861677	444472	376932		263225	260600	70401	103849
350542	213604	269489	139841		1200000	687858	659492	448148		287600	169847	166844	85459
126616	652769	161986	171873		344636	707071	266167	314670		104261	386757	80833	109397
85744	628451	139952	270549		414727	752721	561844	370442		78566	427746	90377	127785
123725	544045	121716	276785		344975	422801	306043	443655		62446	195654	66825	89624
314786	1120000	71186	340533		692783	1070000	712611	749969		285882	759866	54576	155383
25388	271123	183046	272074		208355	744296	420818	500937		12955	140064	85447	192423
37252	252111	338387	157941		90214	699884	545836	216450		17297	202192	166665	82531
197785	231534	193043	654624		229686	545098	183435	395202		121664	167532	61034	264357
98483	820107	87451	101300		404497	636961	263519	406361		73328	430358	38854	47804
85975	1010000		142422		315526	1240000		269676		59732	705524		98026
114562	976471		104393		722381	1300000		550046		102633	681073		84562
258337	897349		485715		799541	527352		508969		176591	429050		185101
36933	457700		404059		232162	689539		376568		29598	262053		163813
440616	600386		202101		784863	616696		184237		371308	318259		77576
19340	1390000		111599		125693	1180000		136975		10766	914061		32310
67433	444906		73499		346271	383517		286237		54785	226007		43876
128428	236900		62913		395688	477011		40725		111433	124077		11528
154997	547216		559553		198537	463558		784343		83946	273687		317857
78169	978162		123091		319647	750674		134669		59258	500774		33184
403947	460180		153990		481064	674761		126961		231635	317488		52033
137902	637823		146981		340740	842473		358477		108186	408999		55886
	155801		47169			385430		113984			119533		17957
	695665		543112			565745		448250			349527		199681
	291817		136675			934061		392663			239619		85327
	81173		126643			299034		401318			42910		66238
	93278		369468			365774		377286			89023		208103
	237439		193072			398214		1250000			154470		181391
	488933		132463			479603		282724			324853		64910
	342607		279351			760351		455057			275725		183243
	420210		179483			568540		486103			241967		122613
	174754		225759			677601		338392			133146		145138
	334269		262069			613281		753162			200758		187186
	328433		116287			960422		250487			254420		69918
	1080000		1238			988458		1736			658110		0
	314415		509463			501553		488791			233899		227250
	82900		388693			222414		636304			41214		222426
	312029		34666			585354		138151			170893		15894
	538741		347641			467806		407988			311658		196857
	345634		364253			863036		376816			182798		188223
	825014		156653			1170000		397446			591629		92690
	985348		113089			351735		108134			273231		30969
	401693		90922			876312		232639			308919		43907
	286266		439527			268841		557410			139866		241940
	387535		253467			1180000		322141			346189		146435
	244655		317449			610096		373663			164978		162047
	964175		435049			1110000		287930			637538		181372
	531413		171947			1610000		302561			439281		74762
	232936		197921			1340000		126995			226121		48563
	356741		228347			966666		358290			180943		97287
	485649		135711			652088		215903			277430		53455
	541013		90323			542915		295499			323740		46450
	512046		244610			820877		449156			336954		127892
	1340000		219161			796539		473678			543861		109741
	84021		223136			397134		336596			50021		59410
	1240000		126739			497340		248524			463056		55479
	410828		271888			854605		748633			238893		180979
	480693		237905			844094		383958			331475		130321
	494807		179729			1150000		150271			467698		43698
	290446		78059			569750		141265			153294		36556
	936518		111489			1440000		146331			734883		40437
	534701		135711			393930		133631			267448		37517
	441795		292804			686215		389473			233575		130763
	536939		522348			1190000		448519			451129		199326
	580292		129061			971522		238053			470925		54792
	230746		301030			718093		358782			135846		103813
	792420		116270			323216		228957			295580		70397
	698753		321227			400670		640263			253191		191131
	249718		411854			413212		76828			104549		76435
	969829		506461			832460		736688			606930		282762
	530003		184355			619038		255868			351429		69218
	1120000		97031			886480		227937			577277		72127
	494671		318755			706330		51425			247552		43038
	359603		219689			595706		513967			265134		114614
	626319		311923			533436		387100			357842		156528
	178066		493581			303807		337512			96114		185808
	352577		435928			688528		485529			234225		194717
	944287		326875			683404		556232			435767		196541
	103239		139153			376635		142351			58897		48074
	1100000		161165			877234		183212			584184		43178
	1150000		266922			1290000		340591			486932		155840
	870008		144172			1020000		326486			529073		94662
	851120		30537			871897		132012			466272		12449
	593832		537003			682151		548833			425314		299706
	1560000		89954			639873		184559			605250		30254
	272374		327412			592793		360312			207076		146837
	637551		517218			980078		335759			366971		210563
	493522		389881			442716		366627			282430		157078
	716095		100827			578817		258097			408138		59155
	444385		126883			332550		153805			190087		44346
	329890		79774			849417		143989			255498		28778
	524193		235160			580090		267533			340389		140604
	174501		71593			571932		152049			154088		16164
	3400000		190729			215273		277089			264151		73867
	453036		595228			737816		351020			271772		198357
	743013		205762			536375		312916			423695		47528
	217618		274463			792223		328643			131809		105176
	245831		231549			1030000		1940000			184847		187109
	628944		290170			2060000		369465			567081		127387
	1590000		277487			799292		317486			765338		122186
	238345		221636			622733		710008			181937		129008
	276859		242285			281077		175443			83238		106838
	226394		259673			1670000		310015			204550		108424
	822816		393121			1220000		387687			620554		227871
	179818		896076			480025		726160			136958		475954
	91809		308758			214481		667918			53838		172707
	233586		413047			471370		455720			145687		232027
	164328		787793			406800		682102			99436		342734
	457563		543369			1000000		291760			285311		130713
	801995		314032			1070000		458909			577681		146464
	407891		438055			766365		338772			221649		152959
	972946		758986			738492		472506			557620		335322
	714297		141023			735618		567621			472887		85980
	206203		292057			535176		285696			135816		132155
	220381		242389			556182		440134			193769		136699
	1240000		656477			1250000		729531			739943		274364
	1360000		361295			678057		442578			569729		183282
	673748		306044			329055		570095			235646		211088
			150039					250674					61974
			68272					121255					22998
			344647					258394					125103
			493345					652957					275166
			123445					88450					20674
			360279					136915					83973
			214524					392574					109841
			168304					226825					86937
			189689					389571					113668
			193194					318679					111824
			92197					265725					38793
			397794					341806					193172
			415287					210554					95524
			205660					558765					116754
			76069					138424					27532
			775138					448549					345938
			193838					120086					40851
			279031					488322					168558
			34507					103096					6481
			549291					373708					234865
			409475					282841					143699
			399970					317736					159220
			141548					405549					71482
			303929					617577					202465
			129388					88014					27809
			401211					361586					148676
			159537					189325					57155
			203457					245124					60806
			199426					253733					69109
			108980					199272					42462
			328343					457049					153812
			681682					528314					257142
			124675					180715					54468
			173858					231635					77135
			296929					1000000					242331
			96458					179536					40520
			355469					297551					151991
			99366					108044					34205
			18978					172960					9836
			335481					331572					112413
			281360					480519					166882
			313787					585849					184575
			444184					631274					275793
			172337					271184					82298
			131873					728426					88448
			357465					324027					123640
			74230					174862					35837
			86922					394787					50823
			112549					199730					56693
			44261					141425					16836

## Sheet: Fig 4D-Signal intensity
Signal intensity/cell
CEACAM1							Lipid raft (GM1)							p-Src							F-actin
gNTC	gNTC+aIgM	gCC1	gCC1+aIgM	gCC1+4L	gCC1+4L+aIgM		gNTC	gNTC+aIgM	gCC1	gCC1+aIgM	gCC1+4L	gCC1+4L+aIgM		gNTC	gNTC+aIgM	gCC1	gCC1+aIgM	gCC1+4L	gCC1+4L+aIgM		gNTC	gNTC+aIgM	gCC1	gCC1+aIgM	gCC1+4L	gCC1+4L+aIgM
2482.34	2199.25	848.454	508.005	1768.39	5319.25		588.275	792.308	617.71	461.146	704.545	945.346		4664.54	5343.1	2291.26	2647.55	3239.64	6397.65		5620.19	4327.63	2488.4	2894	4139.28	4205.72
1673.6	2298.16	850.407	585.403	952.845	1371.28		324.587	1114.83	660.422	556.403	680.915	1201.97		3518.45	7817.26	2474.11	4252.41	2838.05	3698.71		3295.51	5173.83	2553.94	3013.05	3459.34	3605.43
1617.74	2890.43	551.551	557.927	662.602	6631.27		470.114	543.422	815.006	628.111	437.272	815.603		2931.14	8196.05	2286.96	4095.77	8132.28	3955.24		3047.18	4579.6	1724.73	3686.74	4077.36	4160.72
1987.07	1161.38	525.577	418.948	1146.06	5852.73		545.442	682.678	604.537	381.676	872.493	643.845		2382.64	3533.69	2798.76	3267.85	4938.35	6063.76		4418.76	3928.03	1755.32	2445.82	3886.72	4922.78
1214.57	2323.97	562.147	454.442	1725.91	1604.58		546.098	767.297	465.726	830.262	581.386	885.813		3149.32	7623.62	1899.61	3405.16	2969.54	5021.07		3441.95	4203.34	2413.49	2353.34	3324.07	3033.12
2994.39	1153.4	668.625	516.055	809.356	6347.4		653.852	497.121	416.473	781.216	453.725	889.114		4841.51	6857.02	2554.44	5562.26	6048.65	5268.06		4426.53	3503.17	2023.81	1330.3	3122.31	1710.46
1563.24	1100.76	606.157	585.9	1271.42	960		998.532	467.129	662.277	596.612	531.863	707.112		4137.26	6624.77	2229.24	8259.99	2494.49	4814.39		3019.4	3466.87	2267.24	2389.24	3043.64	3109.99
1000.02	1317.36	539.3	446.541	1102.06	9828.98		315.944	509.63	746.103	690.169	516.602	985.07		2948.2	7990.72	3885.3	6088.09	3748.33	4172.94		3544.18	1379.13	2556.23	3304.31	3980.03	4194.04
874.942	1788.57	383.129	411.505	747.548	3077.24		340.611	710.842	385.177	662.216	509.557	1015.03		3532.97	12114.8	4446.62	5188.34	4176.95	8027.8		2934.53	2806.12	2428.03	2659.82	3027.32	4019.24
3107.42	702.321	848.006	478.943	927.515	2906.55		728.734	289.838	876.29	618.188	362.64	1046.13		5653.63	7087.16	5211.89	3385.89	1663.27	4499.28		4203.1	2934.69	2647.77	2063.73	2834.88	4071.5
1021.09	1531.24	692.516	556.847	1280.36	7068.69		348.233	647.074	723.522	857.469	354.171	1164.44		3757.81	7580.84	1669.65	3384.04	3468.8	9066.53		4385.99	3842.53	2312.81	2974.68	3160.07	3484.62
1699.9	1162.83	510.158	438.373	870.245	1796.4		749.968	911.294	465.75	633.65	414.617	933.236		6276.93	7817.17	1527.6	5206.64	4777.32	7152.93		2852.36	4783.25	2241.34	2270.41	3442.71	4506.21
1946.79	1220.17	382.129	544.375	2371.44	965.214		521.414	552.572	426.889	1039.84	544.171	763.715		4437.93	4684.86	3669.57	7441.49	2105.55	5738.46		4734.97	3529.12	5860.58	1985.34	3186.8	4165.42
1835.67	1747.17	624.273	502.96	1090.28	4786.19		399.908	736.794	413.56	745.847	601.889	575.845		2287.31	9142.5	3209.81	5060.03	2277.02	5733.78		4086.28	3279.92	2516.8	3936.47	3026.61	3038.46
2050.96	1184.36	525.733	349.868	895.771	4135.59		520.395	821.287	345.622	476.863	726.705	813.41		4139.13	6442.97	2980.46	4283.7	3290.51	7072.15		4174.52	3876.84	3404.76	3425.13	2924.71	3462.64
1000.03	1439.47	683.408	387.696	3525.98	8795.29		402.572	508.809	444.486	594.745	700.128	1179.22		3746.09	2469.16	4622.23	5468.47	2483.75	9281.57		3799.96	3850.76	3067.34	2159.89	3531.97	3828.6
1710.71	1995.8	713.16	435.705	452.661	5990.9		555.082	1120.42	369.711	686.444	383.867	1032.96		4379.02	7845.54	2842.28	4238.48	2437.62	5893.4		3890.15	2941.06	2636.41	2267.02	4190.15	4987.15
1103.82	2173.75	723.506	458.879	507.941	1526.63		592.675	972.578	690.418	803.723	262.024	851.985		3700.93	10904.3	2617.95	6110.47	3318.07	6218.22		3332.61	2772.67	3014.25	3184.74	2172.31	4063.43
2032.84	1398.82	610.711	429.744	1207.17	1803.28		877.193	812.188	750.425	635.297	625.159	723.947		2926.86	6337.7	3693.38	4031.11	5803.42	6017.49		3361.18	4350.3	3969.33	3365.89	2737.24	4337.57
2147.06	2899.91	705.155	479.75	2545.79	7799.08		815.913	1089.62	826.755	732.34	814.477	633.765		3644.86	7346.84	2055.35	4648.15	4343.07	7085.21		3665.51	4421.68	2648.32	2423.65	3529.1	3798.36
879.346	1513.48	533.768	489.008	1966.78	8227.42		515.623	596.628	636.509	991.346	435.555	742.245		2510.22	7231.19	2247.71	4191.38	1879.44	8516.72		2447.11	4214.88	3256.2	2093.57	2231.72	4415.72
2414.7	1284.77	579.777	231.466	936.75	1686.7		462.341	856.06	357.442	475.647	392.916	943.379		2850.86	5134.11	2562.72	5608.07	1763.31	8181.8		2607.94	3117.18	2965.03	3214.97	3995.93	4352.36
1749.52	1715.61	705.249	229.211	2951.33	1291.04		538.596	844.423	784.814	299.178	486.227	1017.7		3229.59	11471.6	2604.88	6136.76	4839.79	10237		3398.17	4234.46	3402.05	3862.01	2561.78	4911.18
929.667	856.654	632.854	458.162	755.682	1913.81		300.02	654.807	392.247	548.197	451.442	770.216		2785.1	7239.19	3956.18	4688.38	2711.02	1818.43		4639.65	4098.08	2787.41	3402.74	2260.61	3943.01
1723.95	2332.69	786.959	564.833	616.243	4537.78		468.626	700.917	567.015	589.511	371.519	697.777		2608.89	6620.19	2508.59	4055.48	3538.37	7619.12		3409.39	3504.28	2932.02	3389.61	5711.96	6506.22
1921.15	1868.78	643.262	491.687	630.03	3090.51		859.954	567.196	808.433	908.796	610.264	993.332		1448.87	8640.73	2947.99	7756.88	3489.49	10186.6		2023.17	3538.48	4949.88	4159.63	2660.25	3586.71
1856.78	1983.82	567.248	441.948	712.039	1142.87		709.773	542.21	495.517	511.339	367.641	1082.67		3200.98	5846.55	4287.99	5928.17	4050.5	6965.75		4157.67	2890.68	4077.6	2647.3	4114.52	3115.67
2262.93	1507.57	605.006	418.439	4067.37	1549.27		864.218	560.138	601.2	576.996	455.633	794.689		770.037	10587.4	3197.91	4239.96	1619.34	2861.03		2442.35	3907.15	2301.58	3670.6	4513.18	3363.34
1051.51	1536.48	765.039	433.801	899.972	4993.1		419.145	1174.04	431.677	514.212	524.711	1018.85		3303.09	5825.98	5847.4	5141.86	2201.04	3374.4		2793.79	3570.84	3003.87	2404.29	3267.23	6474.68
1190.67	1465.5	812.871	588.354	585.41	3856.84		429.6	875.377	564.898	801.899	548.196	794.849		1209.84	9642.72	2058.87	4011.45	5734.14	6128.17		4656.64	2363.95	3343.66	2855.69	3864.84	3686.79
814.411	2129.84	621.152	627.361	3105.86	7069.52		436.74	870.273	357.089	1077.4	525.046	778.299		3127.81	8941.85	2784.3	5591.28	5554.86	6233.84		2355.18	4102.11	3704.14	3229.8	4390.86	4950.25
1328.9	1272.03	621.241	520.404	2691.17	972.265		398.965	692.788	579.638	658.812	508.2	713.333		2287.04	6960.78	2375.75	4250.56	3804.13	6698.51		4273.08	4359.01	3910.76	2613.55	2587.9	4062.01
1132.2	1522.86	549.795	555.446	1144.73	2200.93		342.94	619.744	421.891	669.818	604.095	1125.55		2620.13	6592.57	2653.17	5257.1	2971.39	7342.52		3575.56	3676.8	1899.98	4016.37	2186.68	3742.79
1455.27	1895.16	500.332	631.068	1452.69	1360.76		403.765	541.28	760.916	811.252	1124.06	784.353		4905.96	9281.14	1376.92	3686.78	2356.19	9206.73		5212.34	2308.73	3654.61	3193.39	3910.87	3314.39
2384.49	1520.46	806.675	554.157	1120.89	2783.79		480.792	350.853	434.411	591.847	663.018	764.877		3449.19	4767.14	4238.97	5532.03	3219.25	8244.33		2168.08	3193.01	3450.45	2583.97	2991.18	3657.95
2405.62	1119.59	461.097	516.857	976.021	2498.41		535.09	442.375	354.186	807.846	612.303	572.073		3421.95	5240.95	2169.6	3849.66	5178.9	7805.46		3759.04	4446.38	3872.57	2302.19	3903.61	3113.12
1304.11	1887.69	596.422	529.731	743.815	1748.92		478.494	880.32	367.188	655.058	401.625	1289.75		3388.64	4850.69	3503.27	5711.81	3311.18	7191.79		3054.55	2843.95	4048.06	3140.07	2497.19	6572.62
1080.12	1674.31	736.128	542.286	342.66	1273.22		353.575	828.614	481.878	1100.16	288.894	884.642		3910.95	5122.31	3323.17	4330.73	4631.35	6753.48		1738.9	5052.33	3021.9	2770.01	1552.87	3150.98
2122.44	1874.1	651.958	506.625	3791.99	2075.1		533.729	663.141	406.96	637.828	764.982	577.225		5312.45	4064.79	1332.9	5637.12	8132.21	4655.7		2356.56	4398.1	3259.99	3053.58	4096.12	4688.2
1596.6	1032.64	883.61	498.733	5060.86	1305.67		330.578	717.806	691.01	631.299	720.833	750.768		5404.52	9864.6	4726.6	5824.93	5465.83	2926.02		2761.12	4247.98	3245.79	3569.63	3200.62	5703.09
955.454	1537.33	674.456	585.064	2863.3	1051.98		337.101	371.374	648.336	965.983	807.702	601.749		2889.62	6363.84	3350.05	4315.6	5326.05	7357.03		3636.56	2801.5	3483.94	3499.32	4078.56	3810.93
740.73	2641.14	983.686	559.372	2166.64	1714.84		248.21	989.249	472.586	1065.66	661.149	869.457		3965.28	6188.54	2402.02	4126.54	3699.18	7374.5		3430.1	3470.33	2442.42	2913.99	4819.69	3111.74
2843.89	1673.43	513.339	362.291	1275.72	871.671		556.461	679.442	551.436	574.006	382.613	697.878		4038.65	6217.75	3998.51	6833.93	915.67	6704.24		5068.06	2642.48	2046.54	3405.88	2556.18	4553.57
1282.13	1531.94	535.901	677.118	494.416	7485.35		262.92	593.499	644.696	582.027	343.812	1080.8		5751.68	8384.61	4041.16	3996.51	3215.07	7863.51		2162.21	5192.09	2726.01	3021.64	2485.5	4754.48
1087.85	2153.85	913.566	468.564	788.223	6426		283.886	874.263	496.415	753.941	719.436	542.814		3719.87	10700.5	2893.55	6338.35	4985.57	10730.8		1658.29	3926.03	2105.38	3333.98	3848.86	4378.46
1390.78	1171.25	577.211	390.381	915.96	1510.81		558.505	807.462	455.183	747.234	358.884	948.278		3496.03	10893.1	3307.13	4535.68	2676.53	4372.4		3247.53	7941.96	2921.99	4068.99	2957.22	3492.89
1278.12	1206.6	595.562	346.524	767.51	1170.28		411.591	660.828	417.576	480.713	470.816	835.008		2953.01	3725.96	2865.21	4342.57	4288.98	4548.81		3751.76	4174.41	1836.44	3559	2983.75	4406.9
1570.2	2429.97	1053.22	440.459	856.17	1798.25		246.328	762.256	639.586	916.409	665.037	958.274		5036.05	6223.06	3295.41	3203.86	2188.61	5081.99		2777.77	3464.03	2988.64	1997.64	2729.78	2462.35
1223.32	1571.53	504.724	486.944	1179.43	1358.15		338.969	692.332	521.046	695.816	414.485	1144.08		3609.9	8020.26	3142.33	5496.01	6300.84	5079.77		3503.61	5968.36	1670.6	3849.99	3045.72	3405.5
1585.7	1168.59	601.342	403.951	1008.27	1461.59		567.76	666.618	899.875	701.246	493.62	1103.24		5378.3	6476.24	2856.93	3250.42	2873.4	4888.5		2814.66	3254.91	3831.23	3685.72	2873.49	5078.71
1272.6	1655.53	576.641	423.968	2012.86	3765.64		585.763	611.912	552.036	723.895	696.534	759.301		6115.94	4901.44	2243.3	3739.55	4225.06	7269.07		3651.71	3633.41	1932.98	3833.77	2285.71
1422.37	1625.77	732.483	485.21	617.188	3975.47		490.547	629.331	536.397	427.733	645.996	905.236		5366.07	6947.33	2272.32	4948.8	2417.1	5208.75		2986.39	3275.09	2469.83	3459.59	2450.5
1902.34	1070.44	677.834	522.154	1161.16	8603.24		409.906	771.235	430.719	941.71	493.581	1680.46		6250.27	6256.97	3718.22	4274.85	3254.79	7625		3084.15	4005.21	2069.44	3577.62	3271.47
1220.01	1932.53	599.17	348.428	473.652	4005.78		889.091	974.279	570.072	491.581	461.133	1069.82		3179.22	7334.92	2717.48	3952.88	3518.56	7389.74		2108.93	3854.22	3170.67	4828.92	3184.63
726.301	1878.15	467.442	456.575	4364.56	1057.07		527.877	674.642	497.073	640.162	822.935	917.551		3721.11	6949.1	1996.65	5664.66	3733.09	8877.63		1998.08	3742.23	2169.89	2641.47	2652.85
1053.89	1998.6	493.752	353.89	1103.48	4740.62		390.735	904.406	553.251	507.764	530.861	1089.66		4771.85	5779.94	2250.72	3195.6	5403.45	5142.72		2275.51	3994.76	2723.57	3703.53	2665.79
2523.73	2856.72	887.236	477.654	1417.76	1537.43		473.053	735.773	1015.23	744.256	697.77	533.093		6118.88	9561.47	1904.1	4676.99	1961.83	3136.19		3404.21	6740.86	1842.56	2699.22	1792.76
1298.86	2925.75	437.376	408.972	903.964	2391.11		711.687	714.063	668.607	588.14	818.136	546.05		4863.76	8416.19	3453.61	3155.12	2871.14	4082.11		3741.43	4042.5	2073.8	2969.39	3192.93
2345.2	2756.61	467.598	561.407	862.121	2200.01		476.78	1799.01	498.798	614.146	1042.46	1623.98		4698.78	6443.44	901.378	3747.72	2199.62	6170.5		3509.07	4030.76	1853.45	2224.48	2341.61
2828.95	2958.05	727.988	387.825	776.284			573.665	825.687	383.481	690.967	662.282			6947.47	10960.4	4059.12	6083.86	1355.15	8058.29		3830.59	3156.18	3300.59	3175.08	3454.02
1992.74	2411.66	425.204	471.632	1322.24			441.072	821.15	328.755	546.221	1012.11				8104.16	4214.89	4054.12	3788.57	7322.4		3921.08	4210.34	3382.88	4104.9	2600.64
1535.43	2134.9	668.015	374.617	572.076			301.848	734.394	315.292	341.9	506.098				5352.57	3803.56	2658.66	4007.69	9656.48		4113.98	3776.02	3568.35		3247.18
2061.43	2534.12	619.471	375.508	1199.7			1149.98	763.868	459.32	422.598	480.038				11370.6	4582.49	3056.29	4521.57	4238.1		4381.86	3744.39	2544.45		1965.17
928.952	1981.58	567.997	538.747	3561.17			434.018	875.924	623.523	712.527	683.649				5666.04	2704.16	4068.21	2928.16	3195.5		3121.05	4190.98	3203.8		3413.04
1579.69	1873.97	611.878	397.27	1096.44			321.859	741.111	443.991	846.825	812.745				8002.29	4280.98	3647.91	3508.31	6293.61		4758.68	4939.13	4141.24		2730.76
1541.48	4122.66		371.98	3169.52			1464.67	972.143		556.445	349.089				9124.48	1463.19	4583.49	3155.17	6236.1		1965.55	4483.57	4597.82		3963.25
3204.28	2266.56		459.959	554.874			565.508	543.9		388.19	721.187				6785.6	3540.92	1914.18	2917.27	5723.38		2459.39	4706.34	3270.84		4818.27
2760.71	2551.03		371.449	3107.95			393.499	1552.28		378.946	650.578				9844.31	2961.65	2148.85	2966.45	10117.4		3006.06	5664.76	3120.93		4262.19
2341.75	3030.31		350.728	4030.26			824.668	848.671		532.689	402.995				5061.12	3273.72	6546.91	5196.7	6415.93		3075.92	4250.04	2714.6		4071.73
1618.09	4872.55		692.359	1334.38			450.033	1040.19		740.193	1156.8				6991.13	925.48		3528.39	2751.22		4059.84	3716.82	1899.12		4113.92
1456.69	2154.94		455.492	2442			309.238	933.405		517.115	526.859				6923.83	3340.55		3275.03	4647.02		2500.57	4919.52	2771.11		1841.57
2356.31	2465.42		337.831	1427.26			410.923	1066.37		314.371	642.085				7798.92	3104.16		3630.5	6252.85		4545.55	3030.13	2070.81		2854.18
1181.26	3078.53		366.665	3474.53			570.848	797.014		286.346	472.989				4469.68	2241.32		799.724	5593.56		4132.36	3080.57	2652.89		2325.05
1847.41	1868.2		410.138	2901.38			766.94	712.17		745.623	1063.99				10825.8	2510.44		2545.85	5015.07		2964.91	3640.32	3293.21		4044.5
1658.23	1705.94		361.183	1510.7			371.236	559.672		659.32	681.431				11203.8	2919.81		1806.87	5555.26		4148.91	3717.47	1030.25		1937.8
1206.05	2395.92		571.588	3532.52			381.131	1084.17		881.502	609.191				5274.78	2292.59		2535.93	4592.09		2692.5	4506.86	3524.48		4391.89
1185.03	2584.03		436.052	3409.44			929.28	789.041		841.057	654.38				11865.1	3424.92		2785.33	7147.24		3442.99	3163.94	1812.51		3988.43
2664.68	2703.39		469.218	1197.57			845.22	549.011		504.837	776.139				8012.56	1344.04		1743.72	8886.49		4139.29	3032.61	2547.47		4175.19
1575.18	3447.36		583.927	1830.35			858.141	1118.08		655.729	550.041				6523.15	2679.02		2084.7	8685.45		5214.22	2537.54	2260.99		3584.5
1637.37	2078.3		450.539	2587.48			306.712	964.075		938.992	535.183				11227.6	2422.76		4370.55	6303.7		3874.7	3162.68	5110.94		1809.85
2095.2	1892.78		412.424	1217.27			569.489	576.411		380.949	477.735				8147.48	3313.2		3017.3	5732.12		4691.59	2818.07	1453.81		2123.87
1616.83	3458.27		431.631	1807.27			652.617	870.411		402.974	338.174				6955.93	1296.94		2961.59	3516.97		3087.63	4235.54	2158.16		2464.33
1381.39	2978.62		697.527	478.02			575.18	1325.04		901.86	369.584				7407.63	2810.3		5913.23	5987.44		2959.69	2816.56	3315.98		3701.73
1528.01	1384.51		586.021	966.689			431.379	562.466		1200.79	619.313				4417.72	2186.81		2907.26	6873.01		4789.25	3579.77	3922.17		946.274
1499.87	1959.43		432.481	1705.56			600.464	690.827		660.197	599.426				9687.3	769.076		5627.4	5197.04		3747.85	5124.95	3539.77		2062.85
1800.69	1617.02		533.456	412.253			509.377	783.678		517.285	486.498				8275.45	2938.08		2183.47	5394.05		3735.94	3611.18	3895.63		2848.65
1554.78	3101.68		595.582	949.09			230.285	660.494		629.577	730.562				10140.6	3305.68		3816.9	3541.39		2461.41	2959.83	3137.43		2804.82
2194.87	1964.64		626.453	1499.35			734.202	972.543		590.095	475.104				4098.21	4146.87		2889.9	5217.63		2607.27	3085.33	2426.85		2748.81
1765.63	1527.96		542.441	2185.13			484.61	746.882		625.813	681.569				9380.79	2933.22		4405.52	4704.7		2492.46	3021.28	1613.33		2833.79
2005.9	2488.38		460.101	5192.77			486.394	920.361		1081.43	721.129				9711.96	2196.69		3251.15	5935.23		2052.67	5252.41	3195.01		2622.46
1343.36	1424.69		526.385	2026.31			480.57	880.222		646.464	873.919				5332	3001.02		4226.5	8053.25		2238.55	3347.46	3412.42		1828.31
2197.81	1937.89		519.658	2503.46			1006.01	605.261		772.603	547.837				7140.65	3296.16		3423.1	8061.72		2578.71	3964.48	3963.29		2660.31
1617.66	4343.7		462.936	4609.91			630.439	1428.21		631.12	736.493				5087.36	3451.86		3237.26	5835.49		1828.52	5217.82	2876.66		3006.36
1618.76	1358.26		544.878	558.027			510.454	823.144		734.539	440.182				10221.6	3733.96		1307.64	4216.2		1683.09	3228.74	2729.39		2681.61
1272.63	1874.55		596.023	2185.33			363.868	913.331		640.765	663.529				3620.85	2054.13		3524.76	4895.4		4072.66	2627.44	3607		2264.8
2351.95	2034.23		406.305	1048.37			539.703	1014.45		492.77	514.413				7251.65	2532.98		1680.61	4532.12		3214.47	3423.55	3831.5		5984.53
2106.12	2166.72		357.606	644.584			810.263	739.824		891.753	731.547				9640.94	2845.54		5029	2985.38		1714.39	3506.09	1611.36		3845.9
1640.11	1972.16		471.922	893.732			403.372	695.319		615.003	709.514				8737.71	4356.13		5245.76	7313.98		3070.81	4364.15	1119.03		1635.19
1647.99	2709.83		644.008	1250.98			521.398	1165.82		974.944	951.696				7338.22	1566.25		4424.19	4243.26		5124.84	3373.09	3432.33		3906.87
1374.59	2128.99		470.287	3341.87			357.729	846.489		576.409	419.754				10216.4	2777.47		5445.78	10034.5		1882.2	2803.43	2288.45		2831.2
1878.71	2383.6		530.534				443.431	711.468		608.15					8002.56	2650.58		3207.3	4454.89		4012.83	2877.93	2734.34		3279.85
1630.1	1961.38		481.192				1095.81	704.486		1077.77					8280.06	2913.42		1702.22	4444.3		3182.46	3363.51	3185.86		1665.12
4742.65			440.94				806.132	566.066		460.707					7706.58	1531.81		3381.76	5432.31		3328.19	4242.79	3073.04		3132.16
1327.67			584.013				334.417	762.203		1168.23					8757.58	2277.99		4686.3	4531.87			3436.64	2749.92		1673.47
2154.65			362.157				925.262	735.324		503.778					7285.81	3157.07		3462.72	4616.01				3057.5		1822.07
3391.04			645.853				466.381	724.836		472.907					9320.71	2430.84		3193.09	6092.87				1662.07		2530.28
2456.32			359.143				417.563	674.049		449.484					11745.1	4081.93		1581.49	4911.14				2923.02		5268.84
1628.47			469.286				489.403	1048.64		655.205					5051.68	2915.9		5646.46	5762.55				3859.66
1199.15			480.351				347.485	808.232		960.006					9289.12	2893.11		2481.11	8265.2				2368.16
825.383			487.286				790.538	637.251		508.919					7384.75	2717.42		2479.51	5479.05				1675.22
1138.89			415.996				313.642	906.287		656.65					7273.09	3006.79		3400.48	7538.02				2716.34
1152.95			427.045				709.667	985.864		658.669					6030.82	2404.17		4156.02	9210.49				1051.13
2685.19			440.555				726.672	637.752		683.687					9048.46	2477		3350.82	2387.49
1951.81			518.148				907.843	565.531		587.549					5289.47	3293.3		2062.18	6232.94
1629.85			471.526				495.053	626.049		789.87					8721.63	1921.71		2137.46	7445.97
1510.82			557.017				481.693	924.92		549.872					7556.12	2930.21		3189.09	5850.13
1603.9			443.789				711.95	770.751		1000.72					4590.65	1902.45		2371.48	8595.3
1572.72			513.731				485.135	623.559		369.444					6158.57	1687.2		3325.89	7510.87
3024.38			456.83				624.286	566.042		756.249					10136.5	3621.84		4298.77	4323.32
1537.75			356.266				946.185	758.075		509.506					8109.31	3615.92		4052.13	3923.24
1032.14			399.446				436.931	658.289		586.828					10674.1	5107.4		4453.31	5922.98
2004.44			556.883				584.92	696.436		654.462					8521.11	2836.14		1968.08	4935.43
1198.48			564.305				438.574	632.738		1115.9					3763.95	3173.63		4763.18	5312.97
2775.57			419.492				566.167	656.804		744.357					6152.13	2785.32		1709.54	6077.86
1294.07			434.206				512.446	1000.63		435.751					7420.2	2167.66		3021.93	9166.43
1188.99			602.975				534.358	640.188		1029					6644.01	3056.7		3361.21	5591.86
1577.52			542.249				639.346	969.146		975.163					7871.3	2619.44		3191.82	8232.09
1014.14			383.877				339.038	751.597		430.404					5502.96	3639.47		2434.32	4328.11
1395.59			510.577				575.776	976.347		623.767					9627.1	2949.59		4292.82	6551.05
1533.56			439.492				640.32	1543.73		452					7376.36	2737.13		2875.61
2977.86			422.159				550.51	841.887		480.57					5124.05	2277.17		1714.41
1982.63			564.379				590.03	810.943		591.051					8742.53	3799.74		3313.96
2596.1							582.836	629.367							8032.87	2269.33
982.837							417.402	723.803							5076.21
1672.76							286.451	838.751							8449.62
1292.3							447.08	719.948							11661
1693.86							779.578	870.337							10755
1072.13							577.818	1035.32							11483
1840.01							686.467	828.13							5859.4
2950.33							591.808	1601.29							10043.8
1575.9							359.369	988.118							8890.17
2123.4							510.418	904.638							4604.4
1361.6							620.321	1047.6							10708.1
1276							530.742	853.552							7476.35
1301.33							338.771	683.98							13769.7
1886.47							333.221	681.918							9502.36
1244.96							578.453	592.435							6044.29
932.895							300.611	1035.86							9987.48
1970.82							493.82	812.47							6423.85
2622.31							1041.76	544.438							8443.86
2470.95							811.235	896.404							9949.01
1422.35							489.219	997.33							4103.41
1679.19							637.884	613.496							9420.28
1351.74							498.115	863.732							9728.61
1756.73							495.226	1315.22							11207.3
2732.5							1044.18	520.591							7414.51
								722.75							6459.86
	2509.97							767.348							7706.1
	2228.29							580.109							11792.7
	2008.09							750.725							8283.68
	2273.37							948.517							10373.2
	2047.02							691.069							6054.33
	1674.71							681.539							7253.92
	3631.78							1004.52							9448.55
	1976.9							857.262							7702.01
	2476.7							646.628							9113.98
	2481							892.404							7344.19
	2518.24							970.778							8158.61
	3661.57							631.312							5651.41
	1768.64							556.631							8469.05
	3140.91							654.539							6347.47
	1705.29							956.346							11715.6
	1676.06							609.005							8398.05
	1350.73							745.914							10044.8
	1424.86							555.265							15092.9
	2262.68							762.891							8835.33
	1083.96							706.558							11472
	2030.52							673.619							3891.97
	1799.57							629.8							9362.39
	1928.15							631.13							10212.9
	2158.67							1043.18							9884.55
	1897.53							670.327							7718.31
	1943.16							933.159							8621.72
	2813.84							755.624							6151.83
	2432.3							970.988							5098.78
	2696.75							1618.65							8588.4
	2858.15							801.604							9941.61
	2361.43							808.388							6831.68
	2545.09							723.148							11793.2
	1806.15							660.583							3673.8
	2061.88							842.196							2900.2
	1793.5							706.527							3599.36
	2921.48							876.254							2985.84
	4296.67							1015.09							5852.84
	2678.33							1492.85							4014.72
	2808.3							802.444							4943.74
	4865.64							1019.17							4528.67
	2137.7							913.936							2633.87
	2419.74							1085.61							2897.06
	2244.05							832.568							2876.81
	3089.33							632.397							4680.47
	1934.46							674.98							2786.96
	1629.12							558.254							3239.96
	2496.39							1054.76							3439.3
	2446.96							774.244							1452.34
	2572.75							544.428							2065.51
	2589.05							886.903							3576.88
	2818.15							1001.69							4267.37
	2099.76							580.494							2413.53
	2839.66							1302.25							2974.18
	3516.52							836.525							3517.96
	1313.22							527.783							1911.29
	1986.73							707.063							3156.25
	1473.78							683.137							2607.81
	1584.6							827.813							1476.96
	1849.95							1327.06							4038.85
	2188.99							883.01							5348.07
	2503.89							605.363							4540.27
	2028.26							722.244							1380.6
	2315.41							794.244							4314.86
	1101.24							581.666							3524.78
	1987.13							889.664							5411.95
	1487.04							972.83							2795.66
	1489.59							647.814							2820.48
	964.816							675.298							2564.28
	1840.17							664.068							2917.87
	2940.53							830.545							6040.17
	1708.31							502.083							2963
	1882.06							833.358							3573.18
	1679.22							504.737							3380.65
	1473.61							738.497							4357.35
	2306.9							640.251							3752.66
	1622.14							628.131							2599.05
	2138.74							923.28							2157.55
	2223.97							604.398							1947.47
	1006.56							459.534							4463.19
	1661.32							385.213							3266.2
	1654.51							445.815							4760.9
	1360.8							927.322							3476.67
	2754.82							625.855							2552.72
	2887.96							601.756							5327.6
	2382.06							1094.01							4481.24
	2340.74							1025.51							2448.87
	943.105							382.342							3242.34
	1418.55							1270.9							5056.52
	1650.36							565.596							3010.57
	1751.81							1035.23							3168.55
	1833.99							1247.21							3874.28
	1131.95							397.535							3337.39
	1909.42							633.528							4371.94
	2338.45							516.51							4761.64
	2069.55							768.779
	1601.69							1030.84
	954.776							602.195
	1576.84							774.324
	1226.33							439.686
	2368.06							747.951
	1599.33							844.717
	1204.46							682.404
	1696.86							994.92
	1489.51							603.957
	1756.63							526.384
	1944.17							714.601
	1661.67							391.972
	1894.61							583.602
	1539.36							587.335
	1234.1							703.496

## Sheet: Fig 4C,D-statistics
Fig 4C: Statistics
	Table Analyzed	Cell Cytoplasm Intensity Sum Ch=1=FLNA			Table Analyzed	Cell Cytoplasm Intensity Sum Ch=2=LYN			Table Analyzed	Cell Cytoplasm Intensity Sum Ch=5=colocalized
	Column D	gCC1+aIgM			Column D	gCC1+aIgM			Column D	gCC1+aIgM
	vs.	vs.			vs.	vs.			vs.	vs.
	Column B	gNTC+aIgM			Column B	gNTC+aIgM			Column B	gNTC+aIgM
	Unpaired t test with Welch's correction				Unpaired t test with Welch's correction				Unpaired t test with Welch's correction
	P value	<0.0001			P value	<0.0001			P value	<0.0001
	P value summary	****			P value summary	****			P value summary	****
	Significantly different (P < 0.05)?	Yes			Significantly different (P < 0.05)?	Yes			Significantly different (P < 0.05)?	Yes
	One- or two-tailed P value?	Two-tailed			One- or two-tailed P value?	Two-tailed			One- or two-tailed P value?	Two-tailed
	Welch-corrected t, df	t=10.20, df=294.0			Welch-corrected t, df	t=11.80, df=418.5			Welch-corrected t, df	t=13.95, df=305.6
	How big is the difference?				How big is the difference?				How big is the difference?
	Mean of column B	561792			Mean of column B	673396			Mean of column B	310607
	Mean of column D	265230			Mean of column D	379458			Mean of column D	123809
	Difference between means (D - B) ± SEM	-296562 ± 29089			Difference between means (D - B) ± SEM	-293938 ± 24915			Difference between means (D - B) ± SEM	-186798 ± 13393
	95% confidence interval	-353811 to -239313			95% confidence interval	-342912 to -244965			95% confidence interval	-213153 to -160444
	R squared (eta squared)	0.2612			R squared (eta squared)	0.2496			R squared (eta squared)	0.3889
	F test to compare variances				F test to compare variances				F test to compare variances
	F, DFn, Dfd	5.768, 229, 279			F, DFn, Dfd	1.753, 229, 279			F, DFn, Dfd	4.871, 229, 279
	P value	<0.0001			P value	<0.0001			P value	<0.0001
	P value summary	****			P value summary	****			P value summary	****
	Significantly different (P < 0.05)?	Yes			Significantly different (P < 0.05)?	Yes			Significantly different (P < 0.05)?	Yes
	Data analyzed				Data analyzed				Data analyzed
	Sample size, column B	230			Sample size, column B	230			Sample size, column B	230
	Sample size, column D	280			Sample size, column D	280			Sample size, column D	280
Fig 4D: Statistics
	Table Analyzed	CEACAM1_JekoNTC,P4,4L			Table Analyzed	Lipid raft GM1_JekoNTC,P4,4L			Table Analyzed	p-SRC_JekoNTC,P4,4L			Table Analyzed	F-Actin_JekoNTC,P4,4L
	Column D	gCC1+aIgM			Column D	gCC1+aIgM			Column D	gCC1+aIgM			Column D	gCC1+aIgM
	vs.	vs.			vs.	vs.			vs.	vs.			vs.	vs.
	Column B	gNTC+aIgM			Column B	gNTC+aIgM			Column B	gNTC+aIgM			Column B	gNTC+aIgM
	Unpaired t test				Unpaired t test				Unpaired t test				Unpaired t test
	P value	<0.0001			P value	<0.0001			P value	<0.0001			P value	<0.0001
	P value summary	****			P value summary	****			P value summary	****			P value summary	****
	Significantly different (P < 0.05)?	Yes			Significantly different (P < 0.05)?	Yes			Significantly different (P < 0.05)?	Yes			Significantly different (P < 0.05)?	Yes
	One- or two-tailed P value?	Two-tailed			One- or two-tailed P value?	Two-tailed			One- or two-tailed P value?	Two-tailed			One- or two-tailed P value?	Two-tailed
	t, df	t=25.58, df=342			t, df	t=4.927, df=397			t, df	t=6.273, df=318			t, df	t=5.471, df=163
	How big is the difference?				How big is the difference?				How big is the difference?				How big is the difference?
	Mean of column B	2046			Mean of column B	785.9			Mean of column B	6774			Mean of column B	3809
	Mean of column D	477.1			Mean of column D	670.1			Mean of column D	4638			Mean of column D	3063
	Difference between means (D - B) ± SEM	-1569 ± 61.33			Difference between means (D - B) ± SEM	-115.8 ± 23.51			Difference between means (D - B) ± SEM	-2136 ± 340.5			Difference between means (D - B) ± SEM	-745.2 ± 136.2
	95% confidence interval	-1689 to -1448			95% confidence interval	-162.1 to -69.61			95% confidence interval	-2806 to -1466			95% confidence interval	-1014 to -476.3
	R squared (eta squared)	0.6567			R squared (eta squared)	0.05762			R squared (eta squared)	0.1101			R squared (eta squared)	0.1551
	F test to compare variances				F test to compare variances				F test to compare variances				F test to compare variances
	F, DFn, Dfd	63.98, 211, 131			F, DFn, Dfd	1.332, 266, 131			F, DFn, Dfd	4.622, 250, 68			F, DFn, Dfd	1.884, 103, 60
	P value	<0.0001			P value	0.0645			P value	<0.0001			P value	0.0084
	P value summary	****			P value summary	ns			P value summary	****			P value summary	**
	Significantly different (P < 0.05)?	Yes			Significantly different (P < 0.05)?	No			Significantly different (P < 0.05)?	Yes			Significantly different (P < 0.05)?	Yes
	Data analyzed				Data analyzed				Data analyzed				Data analyzed
	Sample size, column B	212			Sample size, column B	267			Sample size, column B	251			Sample size, column B	104
	Sample size, column D	132			Sample size, column D	132			Sample size, column D	69			Sample size, column D	61
	Table Analyzed	CEACAM1_JekoNTC,P4,4L			Table Analyzed	Lipid raft GM1_JekoNTC,P4,4L			Table Analyzed	p-SRC_JekoNTC,P4,4L			Table Analyzed	F-Actin_JekoNTC,P4,4L
	Column F	gCC1+4L+aIgM			Column F	gCC1+4L+aIgM			Column F	gCC1+4L+aIgM			Column F	gCC1+4L+aIgM
	vs.	vs.			vs.	vs.			vs.	vs.			vs.	vs.
	Column D	gCC1+aIgM			Column D	gCC1+aIgM			Column D	gCC1+aIgM			Column D	gCC1+aIgM
	Unpaired t test				Unpaired t test				Unpaired t test				Unpaired t test
	P value	<0.0001			P value	<0.0001			P value	<0.0001			P value	<0.0001
	P value summary	****			P value summary	****			P value summary	****			P value summary	****
	Significantly different (P < 0.05)?	Yes			Significantly different (P < 0.05)?	Yes			Significantly different (P < 0.05)?	Yes			Significantly different (P < 0.05)?	Yes
	One- or two-tailed P value?	Two-tailed			One- or two-tailed P value?	Two-tailed			One- or two-tailed P value?	Two-tailed			One- or two-tailed P value?	Two-tailed
	t, df	t=13.65, df=189			t, df	t=6.795, df=189			t, df	t=5.926, df=196			t, df	t=6.470, df=109
	How big is the difference?				How big is the difference?				How big is the difference?				How big is the difference?
	Mean of column D	477.1			Mean of column D	670.1			Mean of column D	4638			Mean of column D	3063
	Mean of column F	3411			Mean of column F	895.1			Mean of column F	6133			Mean of column F	4069
	Difference between means (F - D) ± SEM	2934 ± 215.0			Difference between means (F - D) ± SEM	225.0 ± 33.12			Difference between means (F - D) ± SEM	1495 ± 252.3			Difference between means (F - D) ± SEM	1006 ± 155.5
	95% confidence interval	2510 to 3358			95% confidence interval	159.7 to 290.4			95% confidence interval	997.3 to 1992			95% confidence interval	697.9 to 1314
	R squared (eta squared)	0.4963			R squared (eta squared)	0.1963			R squared (eta squared)	0.1519			R squared (eta squared)	0.2775
	F test to compare variances				F test to compare variances				F test to compare variances				F test to compare variances
	F, DFn, Dfd	797.8, 58, 131			F, DFn, Dfd	1.390, 58, 131			F, DFn, Dfd	2.155, 128, 68			F, DFn, Dfd	2.005, 49, 60
	P value	<0.0001			P value	0.1257			P value	0.0006			P value	0.0106
	P value summary	****			P value summary	ns			P value summary	***			P value summary	*
	Significantly different (P < 0.05)?	Yes			Significantly different (P < 0.05)?	No			Significantly different (P < 0.05)?	Yes			Significantly different (P < 0.05)?	Yes
	Data analyzed				Data analyzed				Data analyzed				Data analyzed
	Sample size, column D	132			Sample size, column D	132			Sample size, column D	69			Sample size, column D	61
	Sample size, column F	59			Sample size, column F	59			Sample size, column F	129			Sample size, column F	50
