# Supplementary material for: CEACAM1 Orchestrates Lipid Raft Dynamics and B-cell Receptor Signaling in Mantle Cell Lymphoma
Source: Research Square preprint supplement (doi:10.21203/rs.3.rs-5321424/v1), 2024-11-01
Supplement: Supplementary file 9 [file 59d1b15a6dd7b5738ff381dc.xlsx]

## Sheet: Fig. 2C-Statistics
CEACAM1 mRNA expression (GSE132929)					Fig 2C: Statistics
BL (n=59)	DLBCL (n=95)	FL (n=65)	MCL (n=43)		Table Analyzed	Copy of CEACAM1 mRNA expression from GSE132929
-0.303981	0.718648	-1.18307	1.84509
-0.446426	-0.0822838	1.51636	0.104739		Column D	BL
-0.659493	0.969035	0.95339	0.921616		vs.	vs.
0.273887	-0.897803	-0.432176	1.65499		Column B	MCL
0.0432672	1.20273	0.114971	-0.536583
-0.017571	-0.660687	0.423832	0.0050652		Mann Whitney test
0.109549	-0.779985	1.15802	3.1081		P value	<0.0001
0.0847703	-0.655177	-0.253383	0.828414		Exact or approximate P value?	Exact
-0.946772	-0.93788	0.873156	1.68232		P value summary	****
1.1152	-0.0941154	-0.052544	1.42186		Significantly different (P < 0.05)?	Yes
-1.12182	-1.43846	1.26599	0.756311		One- or two-tailed P value?	Two-tailed
-0.415795	-0.238175	-0.350709	2.23199		Sum of ranks in column B,D	3314 , 2146
2.2682	3.14713	1.07667	0.00865313		Mann-Whitney U	316
0.0161548	-0.474353	0.038067	0.00166542
-0.70645	-0.452638	-1.1693	2.16091		Difference between medians
0.878296	-0.0290279	0.131548	0.958366		Median of column B	5.665, n=44
-0.618576	-0.246723	0.238629	1.63701		Median of column D	3.844, n=60
-0.887491	-0.082713	0.424103	1.38977		Difference: Actual	-1.821
-0.231863	-0.869457	-1.01465	0.482142		Difference: Hodges-Lehmann	-1.619
0.155264	-0.0782033	-0.110123	1.40481
-0.740917	-0.967314	0.503673	3.44669		Table Analyzed	Copy of CEACAM1 mRNA expression from GSE132929
-0.556122	0.861393	-0.75877	3.42606
-0.75856	-0.779816	0.0607409	2.10847		Column C	DLBCL
-0.547492	-0.0475343	0.33832	0.763935		vs.	vs.
0.330064	-0.00166542	-0.789659	0.705249		Column B	MCL
-0.599963	0.895079	0.78911	1.72495
0.115218	0.245736	-0.69584	2.10522		Mann Whitney test
-0.822754	0.0637127	0.856737	-0.472369		P value	<0.0001
-0.31705	1.39634	-0.255132	0.567823		Exact or approximate P value?	Exact
-0.455805	0.193693	1.19803	0.728064		P value summary	****
-0.670229	-1.1835	-0.534794	1.84421		Significantly different (P < 0.05)?	Yes
1.67105	1.3701	-0.615955	2.45031		One- or two-tailed P value?	Two-tailed
-1.34191	0.902299	-0.667148	1.04499		Sum of ranks in column B,C	4580 , 5290
-0.0422937	0.817939	0.252398	1.58733		Mann-Whitney U	634
-0.66746	-0.410572	2.42197	1.67579
1.02768	-1.22067	2.29585	0.765064		Difference between medians
-0.910616	-1.00327	-1.02152	1.17903		Median of column B	5.665, n=44
-0.434931	-0.0804668	1.02438	2.56834		Median of column C	4.166, n=96
-0.139472	-0.236308	0.726124	1.37864		Difference: Actual	-1.499
0.869285	0.240321	0.207529	0.578735		Difference: Hodges-Lehmann	-1.398
3.13592	1.66973	-0.126535	1.64107
-0.394804	0.0740391	-0.755776	2.44532		Table Analyzed	Copy of CEACAM1 mRNA expression from GSE132929
-0.869614	-0.18404	0.00905912	2.13964
-1.14407	-0.313631	-0.944506			Column B	MCL
-0.946273	-0.610661	-0.96974			vs.	vs.
0.857064	0.0189598	0.0355029			Column A	FL
0.816989	-0.027385	0.619989
-0.948179	-0.664545	-0.56561			Mann Whitney test
-0.0785894	-1.49191	0.181981			P value	<0.0001
-1.16839	0.731176	1.26449			Exact or approximate P value?	Exact
-0.774673	1.52773	-0.737384			P value summary	****
-0.963713	0.353019	-0.890403			Significantly different (P < 0.05)?	Yes
1.91935	0.504388	-0.490494			One- or two-tailed P value?	Two-tailed
-0.813207	-1.14666	0.556913			Sum of ranks in column A,B	2634 , 3471
-0.0254073	-0.495652	0.0485313			Mann-Whitney U	423
-1.80403	-0.279147	-0.470511
-0.571079	-0.582703	-0.385047			Difference between medians
0.355002	-0.897278	-0.296119			Median of column A	4.269, n=66
-0.365363	-0.507479	0.150367			Median of column B	5.665, n=44
	-0.498675	-0.635527			Difference: Actual	1.396
	-0.272042	-0.55679			Difference: Hodges-Lehmann	1.372
	1.1423	-1.0636
	-0.861068	-0.402969
	-0.656271	0.191846
	0.372886	-1.02859
	2.28731
	1.78499
	-0.20816
	2.6472
	-0.442494
	0.567135
	-0.219867
	1.07992
	-0.294864
	-0.847267
	0.183307
	-0.67753
	-1.04754
	0.156121
	-0.0596948
	0.0683937
	-1.34757
	0.709024
	-0.555913
	0.66707
	1.93701
	0.630517
	-0.37599
	0.530846
	0.883229
	-0.61853
	-0.306983
	1.18755
	-0.094046
	-0.113432
