# Supplementary material for: CEACAM1 Orchestrates Lipid Raft Dynamics and B-cell Receptor Signaling in Mantle Cell Lymphoma
Source: Research Square preprint supplement (doi:10.21203/rs.3.rs-5321424/v1), 2024-11-01
Supplement: Supplementary file 10 [file 6c9c8f22a24a297978605baa.xlsx]

## Sheet: Fig. 7A
	Fig 7A: Immunoblots
		Fig 7A				Fig 7A: Densitometry			repl1	repl2	avg=	std=
						pSYK Y352	EV	0'	0.0639161	0.0404526	0.0521843	0.0165912
								10'	0.878485	1.26699	1.07274	0.274714
								60'	0.386536	1.12372	0.755128	0.521268
								120'	0.189672		0.189672
							4L	0'	0.00090782	0.0533994	0.0271536	0.0371171
								10'	0.151237	0.501394	0.326316	0.247598
								60'	0.0418717	0.477951	0.259911	0.308355
								120'	0.000849322		0.000849322
							4S	0'	0.112799	0.218878	0.165839	0.075009
								10'	0.776478	0.823684	0.800081	0.0333802
								60'	0.316497	0.590174	0.453335	0.193519
								120'	0.0407477		0.0407477
									0
						pCD79A	EV	0'	0.671306	0.0542543	0.36278	0.436321
								10'	1.00377	0.834449	0.919107	0.119725
								60'	0.601009	0.575114	0.588062	0.0183104
								120'	0.290954		0.290954
							4L	0'	0.152142	0.0447983	0.0984699	0.0759031
								10'	0.316019	0.274743	0.295381	0.0291865
								60'	0.197058	0.344791	0.270925	0.104463
								120'	0.0581616		0.0581616
							4S	0'	0.404698	0.139843	0.272271	0.18728
								10'	0.880264	0.573614	0.726939	0.216834
								60'	0.544501	0.384627	0.464564	0.113048
								120'	0.331021		0.331021
	Fig 7A: Statistics
	Table Analyzed	Fig 7A pSYK Y352			Table Analyzed	Fig 7A pSYK Y352
	Column A	EV			Column A	EV
	vs.	vs.			vs.	vs.
	Column B	4L			Column C	4S
	Nested t test				Nested t test
	P value	0.033			P value	0.3463
	P value summary	*			P value summary	ns
	Significantly different (P < 0.05)?	Yes			Significantly different (P < 0.05)?	No
	One- or two-tailed P value?	Two-tailed			One- or two-tailed P value?	Two-tailed
	t, df	t=2.756, df=6			t, df	t=1.222, df=2
	F, DFn, Dfd	7.596, 1, 6			F, DFn, Dfd	1.492, 1, 2
	How big is the difference?				How big is the difference?
	Mean of column A	0.9139			Mean of column A	0.9139
	Mean of column B	0.2931			Mean of column C	0.6267
	Difference between means (A - B) ± SEM	0.6208 ± 0.2253			Difference between means (A - C) ± SEM	0.2872 ± 0.2351
	95% confidence interval	0.06965 to 1.172			95% confidence interval	-0.7244 to 1.299
	Random effects	SD	Variance		Random effects	SD	Variance
	Variation within subcolumns	0.3186	0.1015		Variation within subcolumns	0.3105	0.09644
	Variation among subcolumn means	0	0		Variation among subcolumn means	0.08401	0.007058
	Do the subcolumns differ (within each column)?				Do the subcolumns differ (within each column)?
	Chi-square, df				Chi-square, df	0.01262, 1
	P value				P value	0.9105
	P value summary				P value summary	ns
	Is there significant difference between subcolumns (P < 0.05)?	No			Is there significant difference between subcolumns (P < 0.05)?	No
	Data analyzed				Data analyzed
	Number of treatments (columns)	2			Number of treatments (columns)	2
	Number of subjects (subcolumns)	4			Number of subjects (subcolumns)	4
	Total number of values	8			Total number of values	8
	Table Analyzed	Fig 7A pCD79A Y182			Table Analyzed	Fig 7A pCD79A Y182
	Column A	EV			Column A	EV
	vs.	vs.			vs.	vs.
	Column B	4L			Column C	4S
	Nested t test				Nested t test
	P value	0.1052			P value	0.5328
	P value summary	ns			P value summary	ns
	Significantly different (P < 0.05)?	No			Significantly different (P < 0.05)?	No
	One- or two-tailed P value?	Two-tailed			One- or two-tailed P value?	Two-tailed
	t, df	t=2.834, df=2			t, df	t=0.7473, df=2
	F, DFn, Dfd	8.034, 1, 2			F, DFn, Dfd	0.5584, 1, 2
	How big is the difference?				How big is the difference?
	Mean of column A	0.7536			Mean of column A	0.7536
	Mean of column B	0.2832			Mean of column C	0.5958
	Difference between means (A - B) ± SEM	0.4704 ± 0.1660			Difference between means (A - C) ± SEM	0.1578 ± 0.2112
	95% confidence interval	-0.2437 to 1.185			95% confidence interval	-0.7509 to 1.067
	Random effects	SD	Variance		Random effects	SD	Variance
	Variation within subcolumns	0.08129	0.006608		Variation within subcolumns	0.1364	0.01862
	Variation among subcolumn means	0.1557	0.02424		Variation among subcolumn means	0.1879	0.0353
	Do the subcolumns differ (within each column)?				Do the subcolumns differ (within each column)?
	Chi-square, df	3.181, 1			Chi-square, df	1.769, 1
	P value	0.0745			P value	0.1835
	P value summary	ns			P value summary	ns
	Is there significant difference between subcolumns (P < 0.05)?	No			Is there significant difference between subcolumns (P < 0.05)?	No
	Data analyzed				Data analyzed
	Number of treatments (columns)	2			Number of treatments (columns)	2
	Number of subjects (subcolumns)	4			Number of subjects (subcolumns)	4
	Total number of values	8			Total number of values	8

## Sheet: Fig. 7C
	Fig 7C: Densitometry	JEKO-1+gCC1+4L, IP:CC1					Z-138 +gCC1+4L, IP:CC1
		0'	5'	15'	30'		0'	5'	15'	30'
	IP-A1
	CC1	154.091	140.53	157.993	157.732		137.994	141.105	155.332	139.05
	SHP-1	38.964	33.054	45.736	68.402		68.795	85.18	95.855	70.335
	SHP-2	54.971	55.269	78.19	93.307		84.511	114.745	150.08	100.587
	IP-A2
	CC1	145.647	133.259	141.67	148.744		131.025	109.973	115.784	146.055
	PHOSPHO-SYK	19.847	125.203	127.528	121.026		19.024	30.581	39.344	37.253
	SYK	87.203	110.952	125.743	114.671		47.475	44.339	43.556	44.215
	IP-B1
	CC1	173.163	163.972	178.9	161.011		173.416	150.857	180.152	179.301
	SHP-2	85.945	96.178	113.35	91.926		122.867	114.861	144.761	169.222
	IP-B2
	CC1	134.815	141.553	172.652	165.148		119.574	145.699	166.298	158.76
	PHOSPHO-SYK	13.923	114.605	151.433	139.606		17.922	25.676	50.342	56.925
	SYK	91.399	138.26	161.749	145.569		38.728	54.399	77.487	61.988
	SHP-1	71.001	83.775	86.634	94.102		68.118	72.996	81.892	88.881
	Relative quantification wrt CC1 for IP
	IPA1 and A2
		0'	5'	15'	30'		0'	5'	15'	30'
	CC1	1	1	1	1		1	1	1	1
	SHP-1	0.252864	0.23521	0.289481	0.43366		0.498536	0.603664	0.617098	0.505825
	SHP-2	0.356744	0.39329	0.494895	0.591554		0.612425	0.813189	0.966189	0.723387
	PHOSPHO-SYK	0.136268	0.939546	0.900176	0.813653		0.145194	0.278077	0.339805	0.255061
	SYK	0.598728	0.832604	0.887577	0.770929		0.362335	0.403181	0.376183	0.302728
	IPB1 and B2
		0'	5'	15'	30'		0'	5'	15'	30'
	CC1	1	1	1	1		1	1	1	1
	SHP-1	0.526655	0.591828	0.501784	0.569804		0.569672	0.501005	0.492441	0.559845
	SHP-2	0.496324	0.586551	0.633594	0.57093		0.70851	0.76139	0.803549	0.943787
	PHOSPHO-SYK	0.103275	0.809626	0.8771	0.845339		0.149882	0.176226	0.302722	0.35856
	SYK	0.677959	0.976737	0.93685	0.881446		0.323883	0.373366	0.465953	0.390451
	IPA1/A2 and IPB1/B2
	CC1	1	1	1	1		1	1	1	1
	CC1	1	1	1	1		1	1	1	1
	AVG	1	1	1	1		1	1	1	1
	SD	0	0	0	0		0	0	0	0
	SHP-1	0.252864	0.23521	0.289481	0.43366		0.498536	0.603664	0.617098	0.505825
	SHP-1	0.526655	0.591828	0.501784	0.569804		0.569672	0.501005	0.492441	0.559845
	AVG	0.389759	0.413519	0.395633	0.501732		0.534104	0.552335	0.554769	0.532835
	SD	0.1936	0.252167	0.150121	0.0962686		0.0503009	0.0725905	0.0881453	0.0381978
	SHP-2	0.356744	0.39329	0.494895	0.591554		0.612425	0.813189	0.966189	0.723387
	SHP-2	0.496324	0.586551	0.633594	0.57093		0.70851	0.76139	0.803549	0.943787
	AVG	0.426534	0.489921	0.564245	0.581242		0.660468	0.787289	0.884869	0.833587
	SD	0.0986983	0.136657	0.0980749	0.0145834		0.0679424	0.0366273	0.115003	0.155846
	PHOSPHO-SYK	0.136268	0.939546	0.900176	0.813653		0.145194	0.278077	0.339805	0.255061
	PHOSPHO-SYK	0.103275	0.809626	0.8771	0.845339		0.149882	0.176226	0.302722	0.35856
	AVG	0.119771	0.874586	0.888638	0.829496		0.147538	0.227152	0.321263	0.306811
	SD	0.0233296	0.0918675	0.0163178	0.0224052		0.00331521	0.0720195	0.026222	0.0731846
	SYK	0.598728	0.832604	0.887577	0.770929		0.362335	0.403181	0.376183	0.302728
	SYK	0.677959	0.976737	0.93685	0.881446		0.323883	0.373366	0.465953	0.390451
	AVG	0.638344	0.90467	0.912213	0.826187		0.343109	0.388273	0.421068	0.34659
	SD	0.0560242	0.101917	0.0348413	0.0781474		0.0271899	0.0210825	0.0634766	0.0620292
	IPA1/A2 and IPB1/B2 - AVERAGE
		JEKO-1 (gCC1+4L)					Z-138 (+4L)
		0'	5'	15'	30'		0'	5'	15'	30'
	CC1	1	1	1	1		1	1	1	1
	p-SYK	0.119771	0.874586	0.888638	0.829496		0.147538	0.227152	0.321263	0.306811
	SYK	0.638344	0.90467	0.912213	0.826187		0.343109	0.388273	0.421068	0.34659
	SHP-1	0.389759	0.413519	0.395633	0.501732		0.534104	0.552335	0.554769	0.532835
	SHP-2	0.426534	0.489921	0.564245	0.581242		0.660468	0.787289	0.884869	0.833587
	IPA1/A2 and IPB1/B2 - SD
		JEKO-1-gCC1-4L 0'	JEKO-1-gCC1-4L 5'	JEKO-1-gCC1-4L 15'	JEKO-1-gCC1-4L 30'		Z-138+4L 0'	Z-138+4L 5'	Z-138+4L 15'	Z-138+4L 30'
	CC1	0	0	0	0		0	0	0	0
	P-SYK	0.0233296	0.0918675	0.0163178	0.0224052		0.00331521	0.0720195	0.026222	0.0731846
	SYK	0.0560242	0.101917	0.0348413	0.0781474		0.0271899	0.0210825	0.0634766	0.0620292
	SHP-1	0.1936	0.252167	0.150121	0.0962686		0.0503009	0.0725905	0.0881453	0.0381978
	SHP-2	0.0986983	0.136657	0.0980749	0.0145834		0.0679424	0.0366273	0.115003	0.155846
	Fig 7C: Statistics
	Table Analyzed	Fig 7B-JEKO-1 IP:CC1
	Column A	SYK
	vs.	vs.
	Column B	SHP-1
	Nested t test
	Significantly different (P < 0.05)?	<0.0001
	P value summary	****
	Significantly different (P < 0.05)?	Yes
	One- or two-tailed P value?	Two-tailed
	t, df	t=5.719, df=14
	F, DFn, Dfd	32.71, 1, 14
	How big is the difference?
	Mean of column A	0.8204
	Mean of column B	0.4252
	Difference between means (A - B) ± SEM	0.3952 ± 0.06910
	95% confidence interval	0.2470 to 0.5434
	Random effects	SD	Variance
	Variation within subcolumns	0.1382	0.0191
	Variation among subcolumn means	0	0
	Do the subcolumns differ (within each column)?
	Chi-square, df
	P value
	P value summary
	Is there significant difference between subcolumns (P < 0.05)?	No
	Data analyzed
	Number of treatments (columns)	2
	Number of subjects (subcolumns)	8
	Total number of values	16
	Table Analyzed	Fig 7B-JEKO-1 IP:CC1
	Column A	SYK
	vs.	vs.
	Column C	SHP-2
	Nested t test
	P value	0.0058
	P value summary	**
	Significantly different (P < 0.05)?	Yes
	One- or two-tailed P value?	Two-tailed
	t, df	t=4.175, df=6
	F, DFn, Dfd	17.43, 1, 6
	How big is the difference?
	Mean of column A	0.8204
	Mean of column C	0.5155
	Difference between means (A - C) ± SEM	0.3049 ± 0.07302
	95% confidence interval	0.1262 to 0.4835
	Random effects	SD	Variance
	Variation within subcolumns	0.08595	0.007387
	Variation among subcolumn means	0.08348	0.006969
	Do the subcolumns differ (within each column)?
	Chi-square, df	1.935, 1
	P value	0.1642
	P value summary	ns
	Is there significant difference between subcolumns (P < 0.05)?	No
	Data analyzed
	Number of treatments (columns)	2
	Number of subjects (subcolumns)	8
	Total number of values	16
	Table Analyzed	Fig 7B-MINO IP:CC1
	Column A	SYK
	vs.	vs.
	Column B	SHP-1
	Nested t test
	P value	<0.0001
	P value summary	****
	Significantly different (P < 0.05)?	Yes
	One- or two-tailed P value?	Two-tailed
	t, df	t=6.736, df=14
	F, DFn, Dfd	45.37, 1, 14
	How big is the difference?
	Mean of column A	0.3748
	Mean of column B	0.5435
	Difference between means (A - B) ± SEM	-0.1688 ± 0.02505
	95% confidence interval	-0.2225 to -0.1150
	Random effects	SD	Variance
	Variation within subcolumns	0.05011	0.002511
	Variation among subcolumn means	0	0
	Do the subcolumns differ (within each column)?
	Chi-square, df
	P value
	P value summary
	Is there significant difference between subcolumns (P < 0.05)?	No
	Data analyzed
	Number of treatments (columns)	2
	Number of subjects (subcolumns)	8
	Total number of values	16
	Table Analyzed	Fig 7B-MINO IP:CC1
	Column A	SYK
	vs.	vs.
	Column C	SHP-2
	Nested t test
	P value	0.0002
	P value summary	***
	Significantly different (P < 0.05)?	Yes
	One- or two-tailed P value?	Two-tailed
	t, df	t=8.097, df=6
	F, DFn, Dfd	65.56, 1, 6
	How big is the difference?
	Mean of column A	0.3748
	Mean of column C	0.7916
	Difference between means (A - C) ± SEM	-0.4168 ± 0.05148
	95% confidence interval	-0.5428 to -0.2908
	Random effects	SD	Variance
	Variation within subcolumns	0.08103	0.006567
	Variation among subcolumn means	0.04491	0.002017
	Do the subcolumns differ (within each column)?
	Chi-square, df	0.3983, 1
	P value	0.528
	P value summary	ns
	Is there significant difference between subcolumns (P < 0.05)?	No
	Data analyzed
	Number of treatments (columns)	2
	Number of subjects (subcolumns)	8
	Total number of values	16

## Sheet: Fig. 7D
PLA signal counts/cell									Fig. 7D: Statistics
Z-138 + 4L
PLA: CC1-SYK				PLA: CC1-SHP-1					Table Analyzed	PLA: CC1-SYK,SHP1 Z+4L only		Table Analyzed	PLA: CC1-SYK,SHP1 Z+4L only		Table Analyzed	PLA: CC1-SYK,SHP1 Z+4L only		Table Analyzed	PLA: CC1-SYK,SHP1 Z+4L only
0'	5'	15'	30'	0'	5'	15'	30'
0	0	0	0	10	6	16	9		Column E	0'		Column F	5'		Column G	15'		Column H	30'
4	0	0	0	10	3	13	9		vs.	vs.		vs.	vs.		vs.	vs.		vs.	vs.
0	0	0	1	8	2	10	15		Column A	0'		Column B	5'		Column C	15'		Column D	30'
0	1	0	0	13	7	16	5
1	0	0	0	4	8	12	1		Mann Whitney test			Mann Whitney test			Mann Whitney test			Mann Whitney test
2	1	0	1	8	21	14	14		P value	<0.0001		P value	<0.0001		P value	<0.0001		P value	<0.0001
0	0	0	1	5	15	15	19		Exact or approximate P value?	Approximate		Exact or approximate P value?	Approximate		Exact or approximate P value?	Approximate		Exact or approximate P value?	Approximate
0	0	0	0	8	16	13	12		P value summary	****		P value summary	****		P value summary	****		P value summary	****
0	0	0	0	24	22	11	17		Significantly different (P < 0.05)?	Yes		Significantly different (P < 0.05)?	Yes		Significantly different (P < 0.05)?	Yes		Significantly different (P < 0.05)?	Yes
0	0	1	0	24	14	12	12		One- or two-tailed P value?	Two-tailed		One- or two-tailed P value?	Two-tailed		One- or two-tailed P value?	Two-tailed		One- or two-tailed P value?	Two-tailed
0	0	0	0	18	19	13	6		Sum of ranks in column A,E	15785 , 49196		Sum of ranks in column B,F	24587 , 144485		Sum of ranks in column C,G	22822 , 53423		Sum of ranks in column D,H	15422 , 40858
0	0	0	0	21	18	14	14		Mann-Whitney U	733.5		Mann-Whitney U	55.5		Mann-Whitney U	31		Mann-Whitney U	22
1	2	0	0	10	8	14	12
0	2	0	0	10	21	8	18		Difference between medians			Difference between medians			Difference between medians			Difference between medians
0	0	0	0	1	12	20	5		Median of column A	0.000, n=173		Median of column B	0.000, n=221		Median of column C	0.000, n=213		Median of column D	0.000, n=175
2	0	0	0	8	15	20	22		Median of column E	9.000, n=187		Median of column F	12.00, n=360		Median of column G	13.00, n=177		Median of column H	12.00, n=160
0	0	1	0	4	14	16	7		Difference: Actual	9		Difference: Actual	12		Difference: Actual	13		Difference: Actual	12
1	1	1	0	8	12	6	15		Difference: Hodges-Lehmann	9		Difference: Hodges-Lehmann	12		Difference: Hodges-Lehmann	13		Difference: Hodges-Lehmann	12
1	0	0	0	7	13	6	18
0	0	0	0	3	13	6	12
1	1	0	0	8	26	30	16		Fig. 7D: Original confocal IF images
1	0	2	0	7	20	15	9
1	0	1	0	7	20	6	16
0	0	0	0	5	8	14	19
4	0	0	0	0	14	11	21
0	0	0	0	2	9	19	14
1	0	0	0	12	13	30	4
1	0	0	0	5	12	7	2
0	1	0	0	10	19	14	16
0	1	0	0	7	6	20	13
2	0	0	0	16	12	9	18
2	0	0	0	5	15	8	15
0	1	0	0	9	15	6	11
1	0	0	4	10	9	11	5
0	1	2	0	10	16	17	15
0	0	0	0	6	25	13	6
1	0	0	0	15	16	19	16
1	0	0	0	12	12	10	8
1	1	1	0	14	23	17	17
3	0	0	0	13	14	22	13
3	0	0	0	13	18	19	13
0	0	0	0	10	8	4	8
0	1	0	0	11	28	11	17
0	0	0	0	3	18	18	16
0	0	1	0	14	19	3	11
0	0	0	1	11	13	6	7
1	0	0	0	7	15	18	10
0	0	0	0	1	19	16	14
0	0	0	0	9	6	14	20
0	0	0	0	11	23	16	12
4	0	0	0	7	12	14	5
0	1	1	0	7	6	14	20
0	0	0	0	10	6	6	7
0	1	0	0	11	10	18	20
1	0	0	0	11	13	1	8
1	1	0	0	8	7	7	5
0	0	0	0	2	12	5	11
1	0	0	0	8	21	25	16
0	0	0	0	11	13	18	17
0	0	0	0	10	13	3	15
1	0	0	0	17	9	6	9
0	0	0	0	11	14	6	29
0	1	0	0	22	24	8	11
1	0	0	0	7	19	10	9
0	0	0	0	3	16	11	6
0	0	0	0	2	12	13	9
0	2	0	0	9	14	15	4
0	0	0	0	11	12	16	8
0	2	0	0	12	9	7	16
0	1	0	0	8	13	18	11
0	0	0	0	10	26	21	11
0	0	0	0	18	17	8	3
0	0	0	0	10	10	24	18
0	0	0	0	16	14	5	17
0	0	0	0	7	8	14	5
0	0	0	0	6	5	18	10
0	0	0	0	7	14	7	7
1	0	0	0	7	11	23	3
0	0	0	0	4	8	12	9
1	0	0	0	1	16	7	9
0	1	0	0	3	11	22	8
0	0	0	0	14	14	6	4
0	0	0	0	0	25	12	10
0	0	0	0	9	16	9	6
0	0	0	0	4	7	5	9
0	0	0	0	11	9	12	3
0	0	0	0	8	5	8	10
0	1	0	0	9	9	4	20
1	0	0	0	7	18	15	5
1	0	0	1	5	9	15	15
0	1	0	0	2	13	13	4
1	0	0	0	5	20	16	4
2	0	0	0	3	14	4	10
1	0	0	0	4	20	14	7
0	0	0	0	9	10	10	23
2	0	0	0	1	18	10	29
0	1	0	0	7	14	16	22
0	0	0	0	6	12	7	14
1	0	0	0	7	6	22	4
1	0	0	0	8	9	12	17
1	0	0	0	0	14	16	12
0	0	0	0	5	12	12	10
3	0	0	0	10	15	7	6
0	0	0	1	10	13	12	9
0	0	0	0	3	7	10	8
1	0	0	0	2	17	5	18
0	0	0	0	15	16	6	13
0	0	0	0	16	9	14	16
0	0	0	0	23	12	19	11
2	0	0	0	9	10	8	9
0	0	0	0	17	11	13	18
2	0	0	0	9	8	15	15
1	0	0	0	20	10	8	6
0	0	0	0	26	11	14	24
0	0	0	0	11	20	9	8
1	0	0	0	5	16	16	7
0	0	0	0	3	17	12	18
1	0	0	0	11	12	14	9
0	0	0	0	7	7	16	12
0	0	0	0	2	14	11	16
1	0	0	0	10	5	13	11
0	0	0	0	17	7	7	26
0	1	2	0	3	15	8	20
4	0	0	0	8	10	13	21
2	0	0	0	8	10	10	10
0	0	0	0	3	10	14	20
0	0	0	0	9	21	11	18
1	0	0	0	12	7	13	5
1	0	0	2	20	17	13	17
0	0	0	0	11	11	14	17
0	0	0	0	10	17	13	14
0	0	0	1	2	9	1	22
0	0	0	0	16	17	9	14
1	0	0	0	14	13	6	11
0	0	2	0	4	12	17	1
0	0	0	0	8	12	17	8
2	0	1	0	17	20	16	6
0	0	0	0	7	11	16	10
1	0	0	0	25	17	17	13
1	0	0	0	4	22	13	12
0	0	0	1	25	17	16	30
0	0	0	0	13	11	12	22
1	0	0	0	18	18	17	12
0	0	0	0	12	15	8	22
0	0	0	0	11	10	19	21
0	0	0	0	9	15	16	21
2	0	0	1	12	11	9	14
1	0	0	0	11	17	22	14
0	0	0	0	15	15	16	30
0	0	0	0	8	12	18	11
0	0	0	0	13	17	12	27
2	0	0	0	9	10	18	18
0	0	0	0	12	13	11	27
1	0	0	0	13	14	8	21
1	0	0	0	22	19	30	26
0	0	0	0	11	22	10	4
2	0	0	0	8	13	17	20
0	1	1	0	19	18	15	5
1	0	0	0	12	26	19	10
0	0	0	0	7	15	8	14
1	2	0	0	10	8	1
1	1	0	0	10	7	19
0	0	0	0	22	18	17
1	0	0	0	6	23	15
0	0	0	0	3	13	12
1	0	0	0	19	9	19
0	0	0	0	11	10	6
0	0	0	0	2	12	24
1	0	0	0	9	8	20
0	0	0	0	7	6	13
0	0	1	1	22	3	16
0	0	0	0	12	8	14
0	0	0	0	5	4	8
	0	0	0	5	16	14
	0	0	0	10	18	9
	0	0		8	11	8
	0	0		6	20	10
	0	0		10	10
	0	0		20	30
	0	0		16	9
	0	0		21	6
	0	0		9	9
	0	0		10	15
	0	0		3	5
	0	0		9	20
	0	0		2	9
	0	0		10	11
	0	0			1
	0	0			10
	0	0			6
	0	0			11
	0	0			13
	0	0			12
	0	0			19
	0	0			1
	0	0			11
	0	0			11
	0	0			19
	0	0			9
	0	0			6
	0	0			8
	0	0			16
	0	0			19
	0	3			17
	0	0			9
	0	0			15
	0	0			8
	0	0			15
	0	0			7
	0	0			6
	0	0			14
	0	0			13
	0	0			12
	0				5
	0				10
	0				13
	0				6
	0				8
	0				6
	0				3
	0				11
					6
					1
					8
					9
					12
					9
					10
					10
					12
					11
					10
					7
					14
					5
					7
					7
					8
					21
					9
					15
					13
					10
					14
					18
					4
					8
					7
					10
					18
					12
					16
					11
					2
					3
					11
					6
					14
					8
					14
					12
					35
					6
					7
					19
					8
					5
					7
					3
					6
					4
					6
					5
					6
					3
					2
					7
					8
					21
					15
					16
					22
					14
					19
					18
					8
					21
					12
					15
					14
					12
					13
					13
					26
					20
					20
					8
					14
					9
					13
					12
					19
					6
					12
					15
					15
					9
					16
					25
					16
					12
					23
					14
					18
					8
					28
					18
					19
					13
					15
					19
					6
					23
					12
					6
					6
					10
					13
					7
					12
					21
					13
					13
					9
					14
					24
					19
					16
					12
					14
					12
					9
					13
					26
					17
					10
					14
					8
					5
					14
					11
					8
					16
					11
					14
					25
					16
					7
					9
					5
