# Supplementary material for: CEACAM1 Orchestrates Lipid Raft Dynamics and B-cell Receptor Signaling in Mantle Cell Lymphoma
Source: Research Square preprint supplement (doi:10.21203/rs.3.rs-5321424/v1), 2024-11-01
Supplement: Supplementary file 11 [file 7a074a9df159779bcf5bb51c.xlsx]

## Sheet: Suppl. Tables 4,5,6,7
Supplementary Table 4: Primer sequences for amplifying sgRNA library and NGS.
Primer	Sequence
NGS-Lib-Fwd-1	AATGATACGGCGACCACCGAGATCTA CACTCTTTCCCTACACGACGCTCTTCC GATCTTAAGTAGAGGCTTTATATATCT TGTGGAAAGGACGAAACACC
NGS-Lib-Fwd-2	AATGATACGGCGACCACCGAGATCTA CACTCTTTCCCTACACGACGCTCTTCC GATCTATCATGCTTAGCTTTATATATC TTGTGGAAAGGACGAAACACC
NGS-Lib-Fwd-3	AATGATACGGCGACCACCGAGATCTA CACTCTTTCCCTACACGACGCTCTTCC GATCTGATGCACATCTGCTTTATATAT CTTGTGGAAAGGACGAAACACC
NGS-Lib-Fwd-4	AATGATACGGCGACCACCGAGATCTA CACTCTTTCCCTACACGACGCTCTTCC GATCTCGATTGCTCGACGCTTTATATA TCTTGTGGAAAGGACGAAACACC
NGS-Lib-Fwd-5	AATGATACGGCGACCACCGAGATCTA CACTCTTTCCCTACACGACGCTCTTCC GATCTTCGATAGCAATTCGCTTTATAT ATCTTGTGGAAAGGACGAAACACC
NGS-Lib-Fwd-6	AATGATACGGCGACCACCGAGATCTA CACTCTTTCCCTACACGACGCTCTTCC GATCTATCGATAGTTGCTTGCTTTATA TATCTTGTGGAAAGGACGAAACACC
NGS-Lib-Fwd-7	AATGATACGGCGACCACCGAGATCTA CACTCTTTCCCTACACGACGCTCTTCC GATCTGATCGATCCAGTTAGGCTTTAT ATATCTTGTGGAAAGGACGAAACACC
NGS-Lib-Fwd-8	AATGATACGGCGACCACCGAGATCTA CACTCTTTCCCTACACGACGCTCTTCC GATCTCGATCGATTTGAGCCTGCTTTA TATATCTTGTGGAAAGGACGAAACAC C
NGS-Lib-Fwd-9	AATGATACGGCGACCACCGAGATCTA CACTCTTTCCCTACACGACGCTCTTCC GATCTACGATCGATACACGATCGCTTT ATATATCTTGTGGAAAGGACGAAACA CC
NGS-Lib-Fwd-10	AATGATACGGCGACCACCGAGATCTA CACTCTTTCCCTACACGACGCTCTTCC GATCTTACGATCGATGGTCCAGAGCTT TATATATCTTGTGGAAAGGACGAAAC ACC
NGS-Lib-KO-Rev- 1	CAAGCAGAAGACGGCATACGAGATTCGCCTTGGTGACTGGAGTTCAGACGTG TGCTCTTCCGATCTCCGACTCGGTGCC ACTTTTTCAA
NGS-Lib-KO-Rev- 2	CAAGCAGAAGACGGCATACGAGATATAGCGTCGTGACTGGAGTTCAGACGTG TGCTCTTCCGATCTCCGACTCGGTGCC ACTTTTTCAA
NGS-Lib-KO-Rev- 3	CAAGCAGAAGACGGCATACGAGATGAAGAAGTGTGACTGGAGTTCAGACGTG TGCTCTTCCGATCTCCGACTCGGTGCC ACTTTTTCAA
NGS-Lib-KO-Rev- 4	CAAGCAGAAGACGGCATACGAGATATTCTAGGGTGACTGGAGTTCAGACGTG TGCTCTTCCGATCTCCGACTCGGTGCC ACTTTTTCAA
Supplementary Table 5: Primer sequences for cloning sgRNA.
Name	Sequence
gCC1#1_top	CACCgTCTGATTGTTTATCCACCAC
gCC1#1_bottom	AAACGTGGTGGATAAACAATCAGAc
gCC1#2_top	CACCgCACGCCAATAACTCAGTCAC
gCC1#2_bottom	AAACGTGACTGAGTTATTGGCGTGc
gCC1#3_top	CACCgCATGCCATTCAATGTTGCAG
gCC1#3_bottom	AAACCTGCAACATTGAATGGCATGc
gCC1#4_top	CACCgAGAGCTCTTGTGTGCTTTGC
gCC1#4_bottom	AAACGCAAAGCACACAAGAGCTCTc
gNTC-top	CACCGCTGAAAAAGGAAGGAGTTGA
gNTC-bottom	AAACTCAACTCCTTCCTTTTTCAGC
Supplementary Table 6: shRNA sequences.
shRNA	Sequence
shCEACAM1#1	CCGGGACGTATTGGTGTGAGGTCTTCTCGAGAAGACCTCACACCAATACGTCTTTTTG
shCEACAM1#2	CCGGCCCATCATGCTGAACGTAAACCTCGAGGTTTACGTTCAGCATGATGGGTTTTTG
shCEACAM1#3	CCGGCAACCTTCTTGTCATTGAAATCTCGAGATTTCAATGACAAGAAGGTTGTTTTTG
shFLNA#1	CCGGCCCACCCACTTCACAGTAAATCTCGAGATTTACTGTGAAGTGGGTGGGTTTTTG
shFLNA#2	CCGGCCCGCCTGTCACTGCAGCTGCCTCGAGGCAGCTGCAGTGACAGGCGGGTTTTTG
Supplementary Table 7: Primer sequences for cloning of CEACAM1 expression vectors.
Name	Sequence
Primer 1_CEACAM1-F	cgtgagcggccgctgaactgaattcATGGGGCACCTCTCAGCC
Primer 2_CEACAM1-4L-R	TCCTAGCCCGGGTACTCTAGAATTATTACTGCTTTTTTACTTCTGA
Primer 3_CEACAM1-4S-R	TCCTAGCCCGGGTACTCTAGAATTATTATTGGAGTGGTCCTGAGCT
Primer 4_Ires-F	TAAtaattctagagtacccgg
Primer 5_Ires-R	TGTTCAATGGCCGATCCCATGGTTGTGGCCATATTATCA
Primer 6_Neo-F	ATGGGATCGGCCATTGAACA
Primer 7_Neo-R	GTCTCGATCGAGGTCGACGGTATCGATGCGATCCTCAGAAGAACTCGTCAAGAA
