# Supplementary material for: CEACAM1 Orchestrates Lipid Raft Dynamics and B-cell Receptor Signaling in Mantle Cell Lymphoma
Source: Research Square preprint supplement (doi:10.21203/rs.3.rs-5321424/v1), 2024-11-01
Supplement: Supplementary file 12 [file bf0f4143b1c3ffd9b85e1f01.xlsx]

## Sheet: CD79B-SYK
PLA: CD79B-SYK signal counts/cell
CEACAM1- KO JEKO-1
+ 4L		+ YY/FF		+ delta N
0'	5'	0'	5'	0'	5'		Table Analyzed	CD79B-SYK 4L,doppel,deltaN,itim
5	5	2	2	0	1
6	13	1	14	0	3		Column D	5'
11	12	1	3	1	0		vs.	vs.
13	8	0	3	0	7		Column B	5'
5	20	4	5	1	4
15	27	0	7	0	7		Mann Whitney test
14	3	2	2	0	1		P value	<0.0001
5	35	0	7	2	20		Exact or approximate P value?	Approximate
15	20	1	4	0	16		P value summary	****
8	46	1	1	0	11		Significantly different (P < 0.05)?	Yes
0	23	1	13	0	6		One- or two-tailed P value?	Two-tailed
10	28	2	9	1	1		Sum of ranks in column B,D	29560 , 18026
14	36	1	0	0	1		Mann-Whitney U	2975
17	15	0	11	0	7
2	23	3	0	0	3		Difference between medians
3	35	0	8	0	5		Median of column B	15.00, n=135
5	15	4	1	1	0		Median of column D	4.000, n=173
6	12	0	8	0	12		Difference: Actual	-11
4	17	1	8	0	3		Difference: Hodges-Lehmann	-11
1	18	0	2	0	3
20	22	0	4	0	11
1	36	0	8	0	3		Table Analyzed	CD79B-SYK 4L,doppel,deltaN,itim
16	28	4	6	2	6
1	5	1	7	0	0		Column F	5'
4	15	0	12	0	7		vs.	vs.
10	22	1	7	3	3		Column B	5'
4	19	2	2	0	0
11	14	0	5	1	6		Mann Whitney test
2	13	2	8	0	1		P value	<0.0001
1	1	0	0	0	6		Exact or approximate P value?	Approximate
13	16	0	7	0	10		P value summary	****
4	16	0	1	0	0		Significantly different (P < 0.05)?	Yes
1	44	2	1	1	11		One- or two-tailed P value?	Two-tailed
10	36	2	4	1	0		Sum of ranks in column B,F	29597 , 17989
15	14	3	8	0	3		Mann-Whitney U	2938
5	9	0	1	1	2
8	19	1	1	0	10		Difference between medians
6	11	0	8	3	3		Median of column B	15.00, n=135
0	11	1	5	0	2		Median of column F	3.000, n=173
6	13	0	0	0	0		Difference: Actual	-12
6	22	2	2	4	8		Difference: Hodges-Lehmann	-11
5	16	0	2	1	6
5	15	0	2	0	8
8	3	2	6	1	5
6	15	0	4	0	10
3	3	0	2	0	5
11	15	1	2	0	3
6	20	2	2	0	3
7	21	2	1	1	6
9	5	3	1	0	1
22	3	3	8	1	4
10	29	1	2	0	0
1	30	0	5	1	6
12	5	1	1	1	11
20	17	0	4	0	0
15	9	2	6	0	0
13	7	0	8	3	3
29	11	1	5	2	11
12	9	1	3	1	3
11	11	0	10	0	8
16	8	0	0	0	2
12	13	1	5	0	6
11	4	2	3	0	6
3	13	3	5	0	4
7	9	0	6	0	2
9	15	0	5	1	0
16	4	3	1	0	2
5	15	1	4	0	1
2	34	0	8	2	1
8	5	0	12	0	9
4	7	0	21	1	0
0	23	1	4	0	0
2	7	2	1	0	13
1	5	0	0	0	5
2	43	0	4	1	7
6	4	2	12	1	0
1	22	0	1	0	2
7	34	0	3	0	4
6	2	1	9	0	3
1	15	2	6	0	1
6	21	0	1	0	1
2	31	1	4	0	0
10	25	0	3	0	4
6	26	4	4	0	2
8	10	0	7	0	9
1	33	0	1	0	0
4	30	0	2	1	3
1	19	0	3	0	1
4	65	0	2	0	3
5	9	0	4	0	3
1	21	1	4	0	1
11	38	0	8	0	1
11	13	2	9	0	4
4	29	0	3	1	1
4	24	0	7	0	0
6	17	0	10	0	2
3	5	0	15	1	1
5	42	1	4	0	6
7	31	0	4	1	2
1	48	1	8	0	4
6	12	0	2	1	5
2	30	2	6	0	7
3	5	0	9	1	2
9	7	1	1	1	5
6	11	0	3	0	1
3	21	1	3	0	4
7	9	1	1	0	2
0	33	1	9	0	2
10	14	1	4	0	2
0	5	0	8	0	6
0	5	0	0	1	1
0	3	0	8	0	5
12	0	1	1	0	1
5	35	2	2	2	9
0	42	0	4	0	13
2	10	0	3	0	1
12	2	0	0	0	1
5	32	1	0	0	6
0	9	0	9	0	6
2	12	0	10	0	4
7	4	0	4	0	4
0	0	0	2	0	6
11	8	0	1	0	7
2	11	0	7	0	13
5	30	0	1	0	6
5	25	0	6	0	1
1	23	0	6	0	9
4	24	0	2	0	6
2	28	0	8	0	2
4	5	0	4	0	7
3	3	0	3	0	7
1	36	0	0	1	15
2	8	0	1	0	10
	13	0	10	1	14
	6	0	6	1	12
		0	3	0	7
		0	3	0	1
		1	2	0	1
		3	1	0	2
		0	1	0	11
		0	3	0	1
		0	7	0	1
		1	1	0	2
		0	4	0	7
		0	7	0	1
		0	13	0	6
		0	2	0	4
		0	3	0	1
		0	2	0	2
		0	2	0	3
		1	8	0	1
		1	1	0	3
		2	8	0	9
		0	1	0	9
		1	8	0	4
		1	2	0	3
		0	2	0	2
		0	2	0	6
		1	0	0	1
		0	5	0	15
		2	2	0	3
			0	1	0
			1	0	6
			4	0	1
			0	0	1
			3	0	1
			1	0	8
			11	0	4
			5	0	1
			7	0	2
			3	0	1
			6	0	2
			5		3
