# Supplementary material for: CEACAM1 Orchestrates Lipid Raft Dynamics and B-cell Receptor Signaling in Mantle Cell Lymphoma
Source: Research Square preprint supplement (doi:10.21203/rs.3.rs-5321424/v1), 2024-11-01
Supplement: Supplementary file 13 [file d00c1ecc5a34bc22c4bd5466.xlsx]

## Sheet: Sheet1
Fig. 1C: Immunoblots
Fig. 1D: Statistics
	Mean	Day 2	Day 4	Day 6	Day 8		1-tailed, paired t test
	gNTC1	100	87.0204	70.7098	60.0124
	gCC1#1	100	60.7725	38.3234	12.9608		0.0372665
	gCC1#2	100	69.546	47.6523	18.3815		0.0481405
	STDEV	Day 2	Day 4	Day 6	Day 8
	gNTC1	0	5.81862	5.31498	5.90006
	gCC1#1	0	0.691249	13.0027	4.73935
	gCC1#2	0	5.19826	6.57457	0.551331
Fig 1F: statistics
		Mean					Stdev					One-tailed, paired t test
	days	2	4	6	8		2	4	6	8		compared to SUDHL6
	JEKO-1	100	43.6953	18.3729	5.88457		0	6.64021	0.527387	2.66519		0.0294963
	MINO	100	62.4173	27.4694	22.3953		0	10.295	8.29283	0.958994		0.0322465
	MAVER-1	100	94.6498	77.9716	59.2346		0	7.56632	9.84281	7.28176		0.0309346
	OCI-LY10	100	107.499	97.4443	89.4944		0	5.72867	15.8921	14.4024
	HBL1	100	102.066	99.6088	97.3131		0	4.69276	0.553292	8.15126
	SUDHL6	100	112.598	97.0427	73.3846		0	4.51384	6.98263	7.86698
	K1718	100	70	27.5	22		#DIV/0!	#DIV/0!	#DIV/0!	#DIV/0!		0.0346648
	SSK41	100	110.846	106.846	106		0	4.46021	1.19664	8.48528
Fig 1H: statistics
	BLI (photons/s) (x10^6)	Mouse 1	Mouse 2	Mouse 3	Mouse 4	Mouse 5	Mouse 6		Mean	stdev	SEM	1-tailed t test
Day 7	shControl	2.17	2.46	2.5	2.04	2.05	2.75		2.32833	0.286455	0.116945
	sh1906	2.52	1.81	1.86	1.57	1.15	1.44		1.725	0.467622	0.190906	0.0132167
Day 14	shControl	2.72	14.8	15.6	20	27.1	3.72		13.99	9.42047	3.84589
	sh1906	2.77	2.6	2.21	1.92	2.84	1.87		2.36833	0.427056	0.174345	0.0146529
Day 21	shControl	31.5	317	675	821	933	200		496.25	364.432	148.779
	sh1906	72.4	35.1	23.1	5.32	372	12.1		86.67	141.772	57.878	0.0198987
Day 28	shControl	790	1640	9240	4850	4500	785		3634.17	3281.37	1339.61
	sh1906	298	200	120	63.1	4350	82.3		852.233	1715.73	700.444	0.0526228
Day 35	shControl	8470	14700	65900	55500	54900	6070		34256.7	27278.7	11136.5
	sh1906	391	1450	1050	1530	32000	746		6194.5	12649.3	5164.06	0.0279244
Day 42	shControl	Dead	Dead	Dead	Dead	Dead	Dead
	sh1906	681	5890	5410	14800	Dead	564
Fig 1I: statistics
	Comparison of Survival Curves
	Log-rank (Mantel-Cox) test
	Chi square	7.964
	df	1
	P value	0.0048
	P value summary	**
	Are the survival curves sig different?	Yes
	Gehan-Breslow-Wilcoxon test
	Chi square	7.719
	df	1
	P value	0.0055
	P value summary	**
	Are the survival curves sig different?	Yes
	Median survival
	shControl	38
	shCEACAM1	60.5
	Ratio (and its reciprocal)	0.6281	1.592
	95% CI of ratio	0.2026 to 1.948	0.5135 to 4.937
	Hazard Ratio (Mantel-Haenszel)	A/B	B/A
	Ratio (and its reciprocal)	13.67	0.07317
	95% CI of ratio	2.223 to 84.04	0.01190 to 0.4499
	Hazard Ratio (logrank)	A/B	B/A
	Ratio (and its reciprocal)	3.062	0.3266
	95% CI of ratio	0.8233 to 11.38	0.08784 to 1.215
