# Supplementary material for: CEACAM1 Orchestrates Lipid Raft Dynamics and B-cell Receptor Signaling in Mantle Cell Lymphoma
Source: Research Square preprint supplement (doi:10.21203/rs.3.rs-5321424/v1), 2024-11-01
Supplement: Supplementary file 14 [file d52e08dbc784104ca7d8742c.xlsx]

## Sheet: Suppl. Table 8
Supplementary Table 8: Reagents, cells, animals, and software
Antibodies	Source	Identifier
Beta-catenin (12F7) mouse IgG1	Santa Cruz Biotechnology	sc-59737
Phospho-GSK3b (S9) (D3A4) Rabbit IgG	Cell Signaling Technology	9322S
GSK3-beta (D5C5Z) Rabbit IgG		12456S
CD79A Rabbit IgG	Cell Signaling Technology	3351
Phospho-CD79A (Tyr188) Rabbit IgG	Cell Signaling Technology	5173
CD79B (B29/123) Mouse IgG2b	Santa Cruz Biotechnology	sc-53210
LYN Rabbit IgG	Cell Signaling Technology	2732
Phospho-Src (Tyr416) Rabbit IgG	Cell Signaling Technology	2101
Phospho-SYK (Tyr352) Rabbit IgG	Cell Signaling Technology	2701
Phospho-SYK (Tyr525/526) Rabbit IgG	Cell Signaling Technology	2711
Phospho-PLCγ1 (Tyr783) Rabbit IgG	Cell Signaling Technology	14008
Phospho-p44/42 MAPK (Erk1/2) (Thr202/Tyr204) Rabbit IgG	Cell Signaling Technology	4376
Phospho-Akt (Ser473) Rabbit IgG	Cell Signaling Technology	9271
SYK Rabbit IgG	Cell Signaling Technology	2712
PLCγ1Rabbit IgG	Cell Signaling Technology	2822
p44/42 MAPK (Erk1/2) (137F5) Rabbit IgG	Cell Signaling Technology	4695
AKT Rabbit IgG	Cell Signaling Technology	9272
CEACAM1 (E-1) Mouse IgG2b	Santa Cruz Biotechnology	sc-166453
LYN (H-6) Mouse IgG2a	Santa Cruz Biotechnology	sc-7274
Filamin 1 (FLMN01) Mouse IgG1	Santa Cruz Biotechnology	sc-58763
GAPDH (6C5) Mouse IgG1	Santa Cruz Biotechnology	sc-32233
CEACAM1 [EPR4049] Rabbit IgG	Abcam	ab108397
SHP-1 (D-11) Mouse IgG3	Santa Cruz Biotechnology	sc-7289
Goat anti-Mouse IgG2a, Alexa Fluor™ 555	Invitrogen	A-21137
Goat anti-Mouse IgG1, Alexa Fluor™ 647	Invitrogen	A-21240
AffiniPure F(ab')₂ fragment donkey anti-Human IgM	Jackson ImmunoResearch	709-006-073
Rabbit IgG (H+L)	Invitrogen	A-21206
Mouse IgG2b-UNLB (A-1) isotype control	SouthernBiotech	0104-01
HA-Tag (C29F4) rabbit mAb	Cell Signaling Technology	3724
HA-Tag (6E2) Mouse mAb	Cell Signaling Technology	2367
AffiniPure Donkey Anti-Mouse IgG (H+L)	Jackson ImmunoResearch	715-005-150
AffiniPure Donkey Anti-Rabbit IgG (H+L)	Jackson ImmunoResearch	711-005-152
SHP-1 Monoclonal Antibody (1SH01 (11D7C8H5))	ThermoFisher Scientific	MA5-11669
mCEACAM1	Invitrogen	14-0661-82
p-Y (4G10)	EMD Millipore	05-321
Goat Anti-Mouse IgG2a, Human ads-HRP	SouthernBiotech	1080-05
Goat Anti-Mouse IgG2b, Human ads-HRP	SouthernBiotech	1090-05
Goat Anti-Mouse IgG1, Human ads-HRP	SouthernBiotech	1070-05
Goat Anti-Mouse IgG3, Human ads-HRP	SouthernBiotech	1100-05
Goat Anti-Rabbit Ig, Human ads-HRP	SouthernBiotech	4010-05
Reagents and Commercial kits
RPMI-1640	Corning	10-040-CV
FBS	Sigma-Aldrich	F-2442
Penicillin-Streptomycin	Gibco	15140122
MagniSort Mouse B cell Enrichment Kit	ThermoFisher Scientific	8804-6827-74
Glutamine	ThermoFisher Scientific	25030081
Sodium pyruvate	ThermoFisher Scientific	11360070
Beta-Mercaptoethanol	Sigma-Aldrich	444203
DNAse I	Sigma-Aldrich	10104159001
Lipofectamine™ 2000 Transfection Reagent	Life Technologies	11668019
Protease inhibitor cocktail	Sigma-Aldrich	P8340
Halt™ Phosphatase Inhibitor Cocktail	ThermoFisher Scientific	78420
Pierce™ BCA Protein Assay Kit	Pierce Biotechnology	23227
Nitrocellulose membranes	ThermoFisher Scientific	88018
TaqMan™ Universal PCR Master Mix	Thermo Fisher Scientific	4304437
Protein A Agarose beads	Pierce Biotechnology	20421
35 mm poly-L-lysine-coated No 1.5 glass bottom dish	MatTek	P35GC-1.5-14-C
Acti-Stain 488 Phalloidin	Cytoskeleton	PHDG1
4′,6-diamidino-2-phenylindole (DAPI)	Life Technologies	62248
SuperSignal™ West Dura Extended Duration Substrate	ThermoFisher Scientific	34075
SuperSignal™ West Femto Maximum Sensitivity Substrate	ThermoFisher Scientific	34094
Vybrant™ Alexa Fluor™ 488 Lipid Raft Labeling Kit	Invitrogen	V34403
Duolink® In Situ Detection Reagents Red	Sigma-Aldrich	DUO92008
Duolink® In Situ PLA® Probe Anti-mouse PLUS	Sigma-Aldrich	DUO92001
Duolink® In Situ PLA® Probe Anti-rabbit MINUS	Sigma-Aldrich	DUO92005
Taqman probes
CEACAM1 long variants (Hs00989786_m1)	ThermoFisher Scientific
CEACAM1 short variants (Hs00266109_m1)	ThermoFisher Scientific
CEACAM3 (Hs00174351_m1)	ThermoFisher Scientific
CEACAM1 short variants (Hs00266109_m1)	ThermoFisher Scientific
CEACAM3 (Hs00174351_m1)	ThermoFisher Scientific
CEACAM5 (Hs00944025_m1)	ThermoFisher Scientific
CEACAM6 (Hs03645554_m1)	ThermoFisher Scientific
GAPDH (Hs02786624_g1)	ThermoFisher Scientific
Recombinant DNA
pMD2.g	Addgene	12259
psPAX2	Addgene	12260
Human GeCKO v2 Library, 2-plasmid	Feng Zhang (Addgene)	1000000049
Endura ElectroCompetent cells	Lucigen	60242
LentiGuide-Puro	Addgene	52963
Lentiviral vector pHIV-Luc-ZsGreen	Addgene	39196
Cell lines
JEKO-1	ATCC
Z-138	ATCC
MINO	ATCC
REC-1	ATCC
MAVER-1	ATCC
SP-53	Dr. Louis Staudt
SUDHL-4	Dr. Louis Staudt
SUDHL-6	Dr. Louis Staudt
OCI-LY10	Dr. Louis Staudt
HBL-1	Dr. Louis Staudt
RAMOS	Dr. Louis Staudt
K1718	Dr. Louis Staudt
SSK41	Dr. Louis Staudt
H-929	Dr. Louis Staudt
Experimental models ; Mouse
NSG mice (NOD.Cg-Prkdcscid Il2rgtm1Wjl/SzJ)	Jackson Laboratory	5557
Software and Algorithms
MAGeCK software	github.com/liulab-dfci/MAGeCK
ImageJ 142 software	https://imagej.nih.gov/ij/index.html
GraphPad Prism 9.0	https://www.graphpad.com
FlowJo Software vX 10.0.7v2	FLOWJO, LLC
QuPath V.0.3.2	https://QuPath.github.io
