# Supplementary material for: CEACAM1 Orchestrates Lipid Raft Dynamics and B-cell Receptor Signaling in Mantle Cell Lymphoma
Source: Research Square preprint supplement (doi:10.21203/rs.3.rs-5321424/v1), 2024-11-01
Supplement: Supplementary file 15 [file d56d3cfc7b13c5ed4efede84.xlsx]

## Sheet: Suppl. Table 3
Supplementary Table 3: MCL PDX samples.
Case	PDX name	Age	Gender	Disease Stage	Cytogenetics/Karyotype	Exome-seq
98848	BOS 4	81	M	Relapse	IGH-CCND1 by FISH	NOTCH1P2514fs* KRASS136R
44685	BOS 5	63	M	Relapse	t(11;14)(q13;q32) IGH-CCND1	ATMV1671fs* NSD2E1009K CREBBPQ2257H
91438	BOS 7	75	M	Progressive	IGH-CCND1 by FISH	TET2N1103fs*
96069	BOS 9	72	F	Refractory	t(11;14)(q13;q32) IGH-CCND1	BIRC3L548fs*
